# Supplementary material for: Transcriptome and Proteome Expression Analysis of the Metabolism of Amino Acids by the Fungus Aspergillus oryzae in Fermented Soy Sauce
Source: Biomed Res Int. 2015 Apr 7;2015:456802. doi: 10.1155/2015/456802 (PMC4405012; doi:10.1155/2015/456802)
Supplement: Supplementary file 1 — Table S1: The FPKM values of all the genes and genes that involved in amino acid metabolism in A. oryzae 100-8 and 3.042, along with a comparison of those that are related in the two fungus strains. Table S2: The identified spots related to amino acid metabolism of the proteome analysis of A. oryzae 3.042 and 100-8 applying 2D PAGE and MALDI-TOF MS. Table S3: Corrsponding enzymes (coding genes) of biochemical reactions potentially catalyzing these reactions. Reactions and CDSs depicted in Figure 2 are indicated. [file 456802.f1.xlsx]

## Sheet: Table S1
Table S1 The FPKM values and the comparison results of the related genes in A. oryzae 3.042 and 100-8 in the amino acid metabolism
Gene ID of A. oryzae 3.042	Gene ID of A. oryzae 100-8	Gene Annotation	FPKM_3.042_30 h	FPKM_3.042_36 h	FPKM_3.042_42 h	FPKM_1008_30 h	FPKM_1008_36 h	FPKM_1008_42 h
1. amino acid hydrolase
Ao3042_04957	AO1008_08925	dipeptidyl aminopeptidase	69.6467	51.2628	23.5116	128.295	114.199	203.247
Ao3042_04310	AO1008_10299	aspartyl protease	67.4141	51.8881	18.2572	135.805	127.717	80.7899
Ao3042_09696	AO1008_04104	tripeptidyl-peptidase sed2	141.513	43.0481	25.3791	72.501	89.2937	79.0496
Ao3042_08945	AO1008_07822	carboxypeptidase C (cathepsin A)	87.7595	47.306	10.94	148.513	176.648	291.054
Ao3042_04852	AO1008_00157	carboxypeptidase C (cathepsin A)	315.967	144.746	111.94	45.6817	298.71	159.441
Ao3042_08954	AO1008_07831	aspergillopepsin-2 heavy chain	158.424	363.099	108.355	31.1349	116.799	304.119
Ao3042_01331	AO1008_11554	serine carboxypeptidases (lysosomal cathepsin A)	366.501	140.939	70.0725	307.324	547.511	412.242
Ao3042_01573	AO1008_11297	tripeptidyl-peptidase sed2	149.351	138.217	38.6304	388.147	544.207	737.633
Ao3042_08223	AO1008_10885	aspartic-type endopeptidase, putative	297.452	88.8926	28.7079	780.295	364.594	217.177
Ao3042_03187	AO1008_03097	alpha/beta hydrolase family protein, putative	24.4332	20.1674	9.9385	38.2732	44.4786	46.6001
Ao3042_10942	AO1008_00627	putative Xaa-Pro aminopeptidase	15.7807	13.5546	14.5771	43.8654	35.0763	38.7875
Ao3042_05322	AO1008_09201	metalloendoprotease HMP1 (insulinase superfamily)	29.0785	11.8007	10.5213	32.9884	37.8187	22.6518
Ao3042_11601	AO1008_07473	prenyl protein protease	19.7253	11.1637	13.8189	20.6725	26.8869	38.6709
Ao3042_09912	AO1008_08760	M13 family peptidase	34.2083	17.9242	26.2965	29.9024	37.6264	34.0309
Ao3042_04458	AO1008_00611	serine carboxypeptidases (lysosomal cathepsin A)	42.0672	29.4165	29.8261	79.0549	65.7348	46.2073
Ao3042_05498	AO1008_05376	dipeptidyl peptidase III	35.0817	19.3261	20.0207	88.4904	61.875	40.3407
2. amino acid transporter
Ao3042_01176	AO1008_03619	amino acid transporters	35.7745	51.6089	41.6853	9.15757	16.8371	54.771
Ao3042_09669	AO1008_04077	amino acid transporters	58.2903	42.5703	49.3619	13.6272	20.0392	21.7259
Ao3042_03923	AO1008_04621	amino acid transporters	11.5924	23.3116	5.68948	1.00755	5.38786	12.5105
Ao3042_02133	AO1008_10118	amino acid transporters	8.63161	19.5374	27.2171	8.0415	7.55377	9.5463
Ao3042_00365	AO1008_08475	amino acid transporters	8.38664	9.41559	6.88958	3.54343	20.0806	116.663
Ao3042_06544	AO1008_08891	amino acid transporters	8.52137	3.20027	2.37279	41.0929	14.5131	3.9285
Ao3042_01295	AO1008_10476	amino acid transporters	9.86111	7.45068	11.7189	6.32473	20.642	74.3937
Ao3042_03013	AO1008_07138	amino acid transporters	4.57609	11.3539	14.4946	3.53916	25.0705	47.0838
Ao3042_11804	AO1008_07956	amino acid transporters	24.0868	2.22678	2.84224	15.9709	17.075	6.441
Ao3042_09698	AO1008_04106	amino acid transporters	10.6737	13.7526	21.6769	7.53131	33.1141	60.5099
Ao3042_08461	AO1008_08332	amino acid transporters	22.5966	12.2401	5.002	13.1986	32.064	28.7656
Ao3042_04978	AO1008_08946	amino acid transporters	7.04332	4.10346	6.00695	15.5073	29.2553	24.2555
Ao3042_10543	AO1008_11893	amino acid transporters	19.5092	6.07574	9.64553	36.0292	36.2317	16.459
Ao3042_11378	AO1008_01213	amino acid transporters	15.0213	4.5446	5.45514	20.8213	38.892	6.8515
Ao3042_00563	AO1008_02674	amino acid transporters	23.5061	13.5831	10.0362	64.7153	53.7254	127.156
Ao3042_02488	AO1008_07599	amino acid transporters	38.8769	20.3435	21.279	36.915	71.4137	61.7025
Ao3042_11364	AO1008_01227	amino acid transporters	56.153	29.8374	43.9643	102.065	88.3588	46.6848
Ao3042_09015	AO1008_07892	amino acid transporters	60.672	41.2435	27.7727	106.867	112.398	129.331
Ao3042_03111	AO1008_07040	amino acid transporters	354.623	48.6931	98.768	87.072	161.037	52.6715
Ao3042_05422	AO1008_09301	amino acid transporter protein	19.2909	7.25641	5.80848	19.3635	18.1354	14.6133
Ao3042_02042	AO1008_10209	amino acid transporter, putative	349.753	53.5861	90.5453	177.592	434.544	112.561
3. amino acid metabolism relate genes
Ao3042_07353	AO1008_00919	cysteine dioxygenase CDO1	2.37926	22.0142	13.0824	1.78635	6.70378	50.8619
Ao3042_06596	AO1008_04992	cysteine synthase	43.2541	23.0785	22.8887	75.8618	56.9217	43.4313
Ao3042_10223	AO1008_05222	selenocysteine lyase	12.1136	30.9093	32.4252	5.75438	7.12459	6.87501
Ao3042_10950	AO1008_00635	phosphopentothenoylcysteine decarboxylase	34.0671	19.0783	27.5543	27.5515	41.4298	30.0116
Ao3042_01741	AO1008_06982	phenylalanine and histidine ammonia-lyase	33.5888	23.2887	8.10551	148.019	63.0665	44.0186
Ao3042_05174	AO1008_04147	L-kynurenine hydrolase	3.9524	1.20045	2.10573	0.283451	22.9011	4.30611
Ao3042_10662	AO1008_04491	glutamate decarboxylase and related PLP-dependent proteins	8.87701	13.6881	7.74511	71.6193	33.5841	33.8944
Ao3042_10314	AO1008_05313	glutamate decarboxylase/sphingosine phosphate lyase	493.515	118.856	73.4645	1058.97	1091.92	318.228
Ao3042_05455	AO1008_09334	glutamate/leucine/phenylalanine/valine dehydrogenases	275.283	288.942	153.863	396.246	711.124	437.191
Ao3042_00003	AO1008_11218	glutamine synthetase	18.7361	9.28805	8.19193	98.0524	80.3333	66.3677
Ao3042_00002	AO1008_11217	predicted glutamine synthetase	15.3155	16.6625	23.7993	64.7345	74.9889	68.2017
Ao3042_02899	AO1008_07252	S-adenosylmethionine synthetase	0	12.548	133.457	0	0.481809	5.49772
Ao3042_06597	AO1008_04991	sulfite oxidase, molybdopterin-binding component	43.5599	36.2982	77.439	5.45932	10.585	27.151
Ao3042_01432	AO1008_11453	sulfite oxidase, molybdopterin-binding component	2.6284	15.9287	46.9043	0.789846	1.2903	7.8696
Ao3042_05703	AO1008_06002	acetylglutamate kinase/acetylglutamate synthase	38.6756	45.0455	41.1625	91.1552	124.466	159.452
Ao3042_02023	AO1008_10228	putative glutamate/ornithine acetyltransferase	75.5208	68.2852	77.398	254.13	272.495	193.245
Ao3042_06096	AO1008_09628	lysine-ketoglutarate reductase/saccharopine dehydrogenase	31.9487	11.1613	6.70308	139.744	61.1281	11.6567
Ao3042_07008	AO1008_06789	lysine-ketoglutarate reductase/saccharopine dehydrogenase	121.198	129.737	105.478	457.399	284.11	198.697
Ao3042_10751	AO1008_04401	Zn-finger protein	6.34995	2.18387	4.59262	3.95699	8.19141	2.27981
Ao3042_10750	AO1008_04402	4-hydroxyphenylpyruvate dioxygenase	946.591	434.354	602.243	59.4487	1639.19	19.0612
Ao3042_10749	AO1008_04403	unnamed protein product	826.57	403.169	748.099	40.3763	1536.49	23.6227
Ao3042_10748	AO1008_04404	homogentisate 1,2-dioxygenase	304.181	146.098	204.13	95.4583	657.635	24.4225
Ao3042_10747	AO1008_04405	fumarylacetoacetase	265.972	95.8774	119.97	216.711	539.232	27.9833
Ao3042_10746	AO1008_04406	glutathione S-transferase	98.5964	68.2828	121.153	28.0635	261.068	29.0571
Ao3042_10745	AO1008_04407	Zn(II)2Cys6 transcription factor	17.8921	6.19891	9.85355	10.5284	26.5939	8.88291
Ao3042_10744	AO1008_04408	C6 transcription factor, putative	39.046	12.7028	17.7588	12.2255	53.6266	8.96888
Ao3042_07507	AO1008_00528	short chain dehydrogenase	75.038	37.2204	55.9059	80.6412	108.039	107.65
Ao3042_07506	AO1008_00529	triglyceride lipase-cholesterol esterase	26.7685	29.9487	53.6038	33.3993	29.7658	54.3921
Ao3042_07505	AO1008_00530	Ras-related GTPase	11.4793	11.634	11.6485	21.7053	23.6952	15.6583
Ao3042_07504	AO1008_00531	3-Methylcrotonyl-CoA carboxylase, non-biotin containing subunit/Acetyl-CoA carboxylase carboxyl transferase, subunit beta	164.776	53.9655	45.9471	125.413	173.449	53.3787
Ao3042_07503	AO1008_00532	isovaleryl-CoA dehydrogenase	138.756	38.093	42.2814	115.62	140.478	50.0364
Ao3042_07502	AO1008_00533	hypothetical protein AOR_1_862084	2.07737	1.13086	2.31897	3.77546	3.82073	6.17773
Ao3042_07501	AO1008_00534	3-Methylcrotonyl-CoA carboxylase, biotin-containing subunit/Propionyl-CoA carboxylase, alpha chain/Acetyl-CoA carboxylase, biotin carboxylase subunit	127.776	43.1083	41.9392	74.8454	116.199	37.6355
Ao3042_00574	AO1008_02685	threonine aldolase	10.033	4.35163	2.48859	19.7471	14.7957	9.11293
Ao3042_08053	AO1008_02381	threonine aldolase	54.7002	57.2644	55.4876	176.048	118.666	102.261
Ao3042_10525	AO1008_11875	threonine dehydrogenase and related Zn-dependent dehydrogenases	76.5455	169.178	149.773	10.7168	59.1174	71.8412
Ao3042_01362	AO1008_11523	aspartate-semialdehyde dehydrogenase	43.7753	26.9987	26.8334	111.041	67.3722	49.7896
Ao3042_08520	AO1008_08391	L-asparaginase II	11.2515	7.71155	7.77415	15.1288	21.3761	23.2132
Ao3042_05331	AO1008_09210	threonine/serine dehydratases	6.14726	8.39734	12.046	42.5557	22.8197	131.775
Ao3042_05298	AO1008_09177	threonine/serine dehydratases	29.5172	17.3309	21.2824	67.9558	73.5444	30.9624
Ao3042_01944	AO1008_07454	imidazoleglycerol-phosphate dehydratase	16.5176	15.661	20.3354	52.3187	35.7736	44.0369
Ao3042_01660	AO1008_05450	imidazolonepropionase and related amidohydrolases	17.0495	44.8212	26.5318	8.82074	17.1527	33.5523

## Sheet: all the genes
3.042 ID	100-8 ID	3.042_30h_FPKM	3.042_36h_FPKM	3.042_42h_FPKM	100-8_30h_FPKM	100-8_36h_FPKM	100-8_42h_FPKM
Ao3042_00001	AO1008_11216	12.2887	5.02135	1.55862	48.7117	50.0312	28.8044
Ao3042_00002	AO1008_11217	15.3155	16.6625	23.7993	64.7345	74.9889	68.2017
Ao3042_00003	AO1008_11218	18.7361	9.28805	8.19193	98.0524	80.3333	66.3677
Ao3042_00004	AO1008_11219	773.522	978.146	1659.64	25.9767	128.26	520.603
Ao3042_00005	AO1008_11220	0	0.545964	0	0	0	0.273297
Ao3042_00006	AO1008_11221	0	0	0.453638	0.224548	0.306436	0
Ao3042_00007	AO1008_11222	0	0	2.05767	0	0	0.542469
Ao3042_00008	AO1008_11223	0	0.441614	38.6473	0	0	1.47012
Ao3042_00009	AO1008_11224	6.58454	11.1734	9.62327	4.32299	11.5539	23.4002
Ao3042_00010	AO1008_11225	24.119	17.9866	24.3616	28.0489	33.3281	24.3624
Ao3042_00011	AO1008_11226	47.0184	39.9433	43.744	51.0224	43.6416	41.6329
Ao3042_00012	AO1008_11227	13.748	10.2622	11.7937	14.0904	14.075	8.56405
Ao3042_00013	AO1008_11228	11.9725	7.36574	8.18908	32.7092	25.1998	21.8365
Ao3042_00014	AO1008_11229	37.5803	40.2656	38.9351	29.5901	37.8315	35.9551
Ao3042_00016	AO1008_11231	63.1235	82.7476	75.0274	64.026	55.1078	65.9867
Ao3042_00017	AO1008_11232	7.77762	6.77773	7.07942	9.99098	18.969	23.981
Ao3042_00018	AO1008_11233	21.4831	39.8374	35.7361	21.8416	32.2449	39.0575
Ao3042_00019	AO1008_11234	96.5688	135.98	139.876	55.1232	65.6355	79.9406
Ao3042_00020	AO1008_11235	99.3566	75.0548	91.4312	52.2516	91.9096	81.6395
Ao3042_00021	AO1008_11236	0.808698	0.628103	0.802685	0.197848	0.26916	0.713097
Ao3042_00022	AO1008_11237	0.357406	0	0	0	0	0.177204
Ao3042_00023	AO1008_11238	4.23403	1.8551	2.36821	1.16831	2.28608	1.39317
Ao3042_00024	AO1008_11239	38.7154	9.96917	4.65553	3.44536	9.17179	4.13883
Ao3042_00025	AO1008_11240	10.3218	4.47544	2.92997	2.0236	4.03337	1.76192
Ao3042_00026	AO1008_11241	0.408026	0	0	0.127015	0.17305	0
Ao3042_00027	AO1008_11242	4.29192	6.05906	3.09531	4.21219	7.09988	4.66898
Ao3042_00028	AO1008_11243	38.9723	39.1224	22.3818	24.6244	66.0625	84.2409
Ao3042_00029	AO1008_11244	485.657	543.604	302.25	196.047	767.094	1028.68
Ao3042_00030	AO1008_11245	388.116	354.289	224.338	480.387	501.052	559.667
Ao3042_00031	AO1008_11246	182.548	194.087	216.651	421.678	180.111	389.097
Ao3042_00032	AO1008_11247	38.9544	53.1165	46.9416	34.8433	39.4443	44.7999
Ao3042_00033	AO1008_11248	108.473	102.749	101.605	163.641	99.0571	131.493
Ao3042_00034	AO1008_11249	65.6385	64.1895	67.6543	69.9986	68.4383	60.3262
Ao3042_00035	AO1008_11250	12.8371	12.1713	19.6956	5.11229	8.36123	10.0004
Ao3042_00036	AO1008_11251	110.867	68.4653	110.922	42.0347	66.5737	52.9389
Ao3042_00037	AO1008_11252	218.998	136.941	145.069	131.959	177.71	206.796
Ao3042_00038	AO1008_11253	9.84379	8.89983	8.02534	14.2991	9.07803	10.2401
Ao3042_00039	AO1008_11254	1.53732	3.11125	5.8045	2.71298	1.84653	5.35187
Ao3042_00040	AO1008_11255	1.64347	1.31563	5.29853	2.03973	2.6893	3.58097
Ao3042_00041	AO1008_11256	1.75683	1.55957	1.65864	4.09211	3.34262	2.51567
Ao3042_00042	AO1008_11257	28.5148	25.6575	33.1435	41.0225	41.1956	42.8908
Ao3042_00043	AO1008_11258	19.7656	69.8282	53.131	181.691	79.858	235.29
Ao3042_00044	AO1008_11259	0.536903	0.662031	1.01384	0.583653	2.1568	5.47929
Ao3042_00045	AO1008_11260	0	0	0.403953	0.199845	0	0.211741
Ao3042_00046	AO1008_11261	0	0	0	0	0	0
Ao3042_00047	AO1008_11262	17.0323	3.65582	4.43958	60.8272	40.9021	7.31786
Ao3042_00048	AO1008_11263	14.5763	6.26926	6.61473	122.53	44.7039	18.5028
Ao3042_00049	AO1008_11264	14.4143	12.2505	19.0155	5.63874	12.0356	11.4509
Ao3042_00050	AO1008_11265	3.69002	2.37813	3.17484	5.36051	5.16319	4.30612
Ao3042_00051	AO1008_01589	39.909	56.9379	64.4784	37.6632	48.753	29.0131
Ao3042_00052	AO1008_01590	14.1018	17.1652	21.4796	11.3171	8.88643	8.96893
Ao3042_00053	AO1008_01591	11.5243	54.1842	94.9336	4.3704	7.3662	25.7289
Ao3042_00054	AO1008_01592	35.7425	40.2857	56.1467	31.7488	50.3681	52.6273
Ao3042_00055	AO1008_01593	12.325	20.0785	7.92431	3.70179	4.19755	4.52353
Ao3042_00056	AO1008_01594	30.5078	27.8184	20.0954	21.4017	20.137	18.1299
Ao3042_00058	AO1008_01596	45.9257	131.378	99.6084	150.431	187.055	68.8321
Ao3042_00059	AO1008_01597	12.8146	17.245	17.6021	32.305	38.1956	15.058
Ao3042_00060	AO1008_01598	17.3489	42.2563	26.2908	43.9848	33.3865	31.002
Ao3042_00061	AO1008_01599	4.68924	10.2908	4.06245	6.05659	9.94833	10.6882
Ao3042_00062	AO1008_01600	2.91462	3.39763	4.83642	6.00729	7.50622	4.79729
Ao3042_00063	AO1008_01601	19.0842	41.9591	33.1478	72.496	65.3134	69.1315
Ao3042_00064	AO1008_01603	37.5166	27.1178	18.613	16.0699	40.158	38.1518
Ao3042_00065	AO1008_01604	17.3997	14.4954	15.802	45.2835	28.4753	14.2768
Ao3042_00066	AO1008_01605	19.1292	14.4957	17.7811	33.5151	28.5206	27.5528
Ao3042_00067	AO1008_01606	990.902	965.422	658.521	128.664	363.47	364.641
Ao3042_00068	AO1008_01607	48.4822	54.0784	36.1711	39.5082	50.7677	51.2847
Ao3042_00069	AO1008_01608	2.9996	11.1758	12.1792	3.61529	4.38376	5.53291
Ao3042_00070	AO1008_01609	0.266422	0	0.335385	0.330984	0.337958	0.0877048
Ao3042_00071	AO1008_01610	25.5386	49.912	75.6803	30.5655	33.1378	39.3281
Ao3042_00072	AO1008_01611	26.2193	23.1981	25.7927	34.5127	35.0847	29.3419
Ao3042_00073	AO1008_01612	3.20516	33.8673	70.137	0.231485	2.84345	11.281
Ao3042_00074	AO1008_01613	1.21007	42.285	81.5983	0.251103	3.76315	17.1644
Ao3042_00075	AO1008_01614	2.13516	38.499	70.4002	0.3359	4.1333	10.3164
Ao3042_00076	AO1008_01615	41.9557	562.273	947.971	4.76333	99.6465	354.54
Ao3042_00077	AO1008_01616	5.55451	32.5458	36.8435	0.163828	3.86244	13.1706
Ao3042_00078	AO1008_01617	7.43416	15.0161	14.3155	5.56988	11.1719	10.638
Ao3042_00080	AO1008_01619	0.123951	6.59221	23.9727	0	0.706331	2.6898
Ao3042_00081	AO1008_01620	0	1.82648	2.78409	0	0	0.243361
Ao3042_00082	AO1008_01621	0	8.85242	21.4514	0	0	3.21586
Ao3042_00083	AO1008_01622	0	0	0	0	0	1.8131
Ao3042_00084	AO1008_07479	0.377806	0.373463	0.238042	0.822852	0.16013	0.124581
Ao3042_00085	AO1008_07480	75.5641	63.4179	57.6517	133.404	91.5289	76.3051
Ao3042_00086	AO1008_07481	21.639	19.3185	19.9494	26.934	23.3998	20.1568
Ao3042_00087	AO1008_07482	107.886	49.1227	66.9375	115.772	198.843	102.019
Ao3042_00088	AO1008_07483	73.1388	52.3874	44.2125	170.368	79.1383	60.1992
Ao3042_00089	AO1008_07484	5.54786	5.20144	5.52228	7.63885	9.85148	6.07142
Ao3042_00090	AO1008_07485	80.6795	54.6656	134.553	19.2993	28.6474	42.4107
Ao3042_00091	AO1008_07486	1.79077	0.764348	3.88233	1.4418	0.984058	0.763712
Ao3042_00092	AO1008_05172	0	0.222039	0	0.279494	0	0.296189
Ao3042_00093	AO1008_05173	0.209082	0	0	0	0	0
Ao3042_00094	AO1008_05174	0.0863161	0.383087	0.651907	0	0.21895	0.17047
Ao3042_00095	AO1008_05175	0.414003	0	0	0	0	0
Ao3042_00096	AO1008_05176	0	0	0	0	0	0
Ao3042_00097	AO1008_05177	0.414003	0	0	0	0	0
Ao3042_00098	AO1008_05178	3.57609	1.76279	3.15042	0	1.41045	0.0784489
Ao3042_00099	AO1008_05179	0.512663	1.53177	1.94504	0.240783	0.986042	0
Ao3042_00100	AO1008_05180	10.1586	3.66152	10.158	0	2.51809	2.43211
Ao3042_00101	AO1008_05181	11.312	21.9434	17.3575	0	8.01048	0.729859
Ao3042_00102	AO1008_05182	13.9997	8.58061	6.87633	3.73449	11.3662	9.06338
Ao3042_00103	AO1008_05183	36.1125	23.3329	29.4323	1.81419	13.9572	4.01589
Ao3042_00104	AO1008_05184	5.5678	2.57288	1.81284	0.137577	2.03906	0
Ao3042_00105	AO1008_05185	0.564841	0.209565	0.267027	0	0.359457	0.279577
Ao3042_00106	AO1008_05186	1.35438	0.401864	0.768217	0.252958	0.172318	0.536158
Ao3042_00107	AO1008_05187	1.0145	4.0608	1.28591	0	0.43592	0.675554
Ao3042_00108	AO1008_05188	0.140749	0	0.532303	0	0	0
Ao3042_00109	AO1008_05189	0	0.320926	0	0	0	0
Ao3042_00110	AO1008_05190	3.32724	7.40564	5.24278	4.66142	8.29181	4.25391
Ao3042_00111	AO1008_05191	16.1873	28.5754	38.888	11.4452	14.6676	16.1721
Ao3042_00112	AO1008_05192	0.27551	7.33892	29.8295	0	0.116518	2.35843
Ao3042_00114	AO1008_05459	1.82084	7.17279	5.49693	2.08959	2.61301	5.32798
Ao3042_00115	AO1008_05460	17.2575	6.90739	3.97378	32.6753	22.7418	38.6396
Ao3042_00116	AO1008_05461	5.12493	8.57501	3.4897	24.6528	13.4242	9.53973
Ao3042_00117	AO1008_05462	0.129351	0.381778	2.03286	0	0	0.127481
Ao3042_00118	AO1008_05463	14.3453	10.2347	5.34081	5.8583	6.38212	3.62197
Ao3042_00119	AO1008_05464	640.584	787.708	758.889	1812.6	783.714	1111.94
Ao3042_00120	AO1008_05465	96.8642	92.0662	95.5663	214.583	115.867	166.611
Ao3042_00121	AO1008_05466	8.42899	7.16489	10.4982	13.9534	10.9203	10.5387
Ao3042_00122	AO1008_05467	15.6982	13.8446	13.1275	14.9327	13.9469	13.1359
Ao3042_00124	AO1008_05469	40.4074	35.7631	39.2296	67.1655	43.1904	36.2889
Ao3042_00125	AO1008_05470	1.18936	7.91728	12.5112	2.21595	1.4006	2.01324
Ao3042_00126	AO1008_05471	47.9737	24.906	22.0032	57.5601	38.765	22.0677
Ao3042_00127	AO1008_05472	15.1935	8.45447	10.0402	11.2065	10.8879	7.25154
Ao3042_00128	AO1008_05473	23.1206	24.5009	27.0884	31.6455	24.9578	35.9992
Ao3042_00129	AO1008_05474	0	0	0	0	6.52068	0
Ao3042_00130	AO1008_05475	42.2378	43.8853	37.9327	49.4575	43.0552	38.6576
Ao3042_00131	AO1008_05476	11.3592	9.64538	14.5347	4.41624	7.66935	10.9991
Ao3042_00132	AO1008_05477	9.47648	13.3072	11.7553	11.4005	14.4038	18.1784
Ao3042_00133	AO1008_05478	69.6781	60.1492	61.6634	123.041	95.9592	104.054
Ao3042_00134	AO1008_05479	9.78329	7.01918	7.60267	10.8652	11.4017	10.2232
Ao3042_00135	AO1008_05480	26.4786	18.6589	21.6753	10.6432	15.0036	15.8589
Ao3042_00136	AO1008_05481	13.2479	10.4417	14.7443	2.40301	2.668	2.94937
Ao3042_00137	AO1008_05482	64.197	61.4369	48.41	54.8627	43.9691	38.7538
Ao3042_00138	AO1008_05483	22.752	28.6775	19.8264	14.6368	31.0246	51.7608
Ao3042_00139	AO1008_05484	149.984	133.335	93.6386	114.788	182.328	194.371
Ao3042_00140	AO1008_05485	13.4187	9.96958	7.23594	19.3	17.5421	16.2541
Ao3042_00141	AO1008_05486	66.287	35.2417	41.8986	40.5962	59.6263	40.7546
Ao3042_00142	AO1008_05487	9.88982	3.92813	4.92412	9.4778	11.4344	5.39468
Ao3042_00143	AO1008_05488	6.83656	9.87872	8.44522	4.96956	4.0812	7.11896
Ao3042_00144	AO1008_05489	18.6773	26.0606	15.0228	21.3507	52.1501	31.1807
Ao3042_00145	AO1008_05490	78.0613	74.7483	70.238	78.9058	77.4844	74.2
Ao3042_00147	AO1008_05492	36.0821	32.4865	22.603	52.3843	79.8438	60.1661
Ao3042_00148	AO1008_05493	334.846	117.316	49.7652	1347.65	763.162	404.65
Ao3042_00149	AO1008_05494	13.5704	10.4816	5.572	18.9749	15.1027	20.0143
Ao3042_00150	AO1008_05495	542.08	46.5817	35.7082	420.666	609.84	76.5864
Ao3042_00151	AO1008_05496	0	0	0	0	0	0
Ao3042_00152	AO1008_05497	0	0	0	0	0	0
Ao3042_00153	AO1008_05498	0	0	0	0	0	0
Ao3042_00154	AO1008_05499	0	0	0	0	0	0
Ao3042_00155	AO1008_05500	0	0	0	0	0	0.204655
Ao3042_00156	AO1008_05501	0.70607	15.8709	47.5903	1.09799	4.18745	9.30953
Ao3042_00157	AO1008_05502	29.5038	17.1972	21.1331	20.3425	22.3144	21.9262
Ao3042_00158	AO1008_05503	85.2503	66.8806	57.1571	133.421	86.9183	98.0379
Ao3042_00159	AO1008_05504	87.6591	110.071	140.77	90.9147	89.9946	86.497
Ao3042_00160	AO1008_05505	4.33834	8.08502	9.22108	4.25726	2.77594	5.43839
Ao3042_00161	AO1008_05506	8.46592	9.07612	8.53262	9.24266	9.91875	9.73357
Ao3042_00162	AO1008_05507	52.6627	42.5279	48.2078	103.867	113.914	78.2363
Ao3042_00163	AO1008_05508	15.1299	15.5426	24.6218	29.254	23.0066	31.3327
Ao3042_00164	AO1008_05509	91.2035	96.2036	125.216	162.832	157.165	106.669
Ao3042_00165	AO1008_05510	93.3643	112.412	133.655	127.599	148.847	122.488
Ao3042_00166	AO1008_05511	7.99448	5.32925	4.18355	11.0607	6.86554	3.61964
Ao3042_00167	AO1008_05512	30.049	31.5103	24.946	38.8259	29.769	28.4578
Ao3042_00168	AO1008_05513	37.491	73.5244	72.307	13.442	33.5506	21.811
Ao3042_00170	AO1008_01783	0	0	6.17599	0	0.148327	0.461673
Ao3042_00171	AO1008_01784	0	0.193572	5.1813	0	0.166001	0.645686
Ao3042_00172	AO1008_01785	0	0.572335	27.6699	0	0	0.190768
Ao3042_00173	AO1008_01786	0	0.609159	3.75972	0	0	0.0677817
Ao3042_00174	AO1008_01787	1.80919	0.54388	1.37682	1.02493	0.934306	2.89451
Ao3042_00175	AO1008_01788	2.88731	0.857142	3.27621	1.88823	2.57294	3.00157
Ao3042_00176	AO1008_01789	0	0.787433	0	0	0	0.350017
Ao3042_00177	AO1008_01790	0.527829	0.469037	1.19657	1.08284	0.93838	2.19102
Ao3042_00178	AO1008_01791	28.1481	21.1391	37.4423	0.0389399	1.74817	8.13204
Ao3042_00179	AO1008_01792	1.52546	0	4.85679	0.483567	0	2.55943
Ao3042_00180	AO1008_01793	0.534787	2.56841	1.13536	0.0622198	1.01614	1.45096
Ao3042_00181	AO1008_01794	0	0.123952	0.15821	0	0	0
Ao3042_00182	AO1008_01795	0	0	0	0.306918	0	0
Ao3042_00183	AO1008_01796	0.249681	1.11058	0.471931	0.349566	0.476179	0.493966
Ao3042_00184	AO1008_01797	1.02533	1.91472	1.45878	0	0.657361	0.765245
Ao3042_00185	AO1008_01798	0.213222	0.157903	0	0.0994196	0.270781	0.210744
Ao3042_00186	AO1008_01799	0.234371	0.231043	0.5899	0	0	0.0771163
Ao3042_00187	AO1008_01800	3.16745	2.40233	2.91322	0.832103	2.57435	3.60814
Ao3042_00188	AO1008_01801	10.3629	9.41045	9.89007	12.13	10.7714	13.5203
Ao3042_00189	AO1008_01802	1.53712	3.98173	3.62883	2.59678	3.53572	13.477
Ao3042_00190	AO1008_01803	0	0	0	0	0	0
Ao3042_00191	AO1008_01804	0.225472	0	1.28207	0	0.288535	1.5684
Ao3042_00192	AO1008_01805	11.6838	23.6105	21.4952	15.5752	17.4412	30.5553
Ao3042_00193	AO1008_01806	2.19654	12.8637	11.7238	1.06815	1.45436	4.52854
Ao3042_00194	AO1008_01807	0.159512	0	0	0	0	0.158037
Ao3042_00195	AO1008_01808	0.177964	1.32334	0.33687	0.333069	0	0.529399
Ao3042_00196	AO1008_01809	0	0	0	0	0	0
Ao3042_00197	AO1008_01810	0.878886	0	0	0.206026	0	0
Ao3042_00198	AO1008_01811	4.06242	3.92773	4.86667	7.93016	6.93226	9.71666
Ao3042_00199	AO1008_01812	1.5428	1.33463	0.486067	1.56028	1.96203	4.07036
Ao3042_00200	AO1008_01813	0	0	0.17568	0	0	0
Ao3042_00201	AO1008_01814	0	0	0	0	0	0
Ao3042_00202	AO1008_01815	0	0	0	0	0	0
Ao3042_00203	AO1008_01816	4.30688	1.32297	0.280893	4.44084	6.24069	3.08839
Ao3042_00204	AO1008_01817	0	0	1.32391	0	0	0
Ao3042_00205	AO1008_01818	0.612315	1.21601	0.77326	0.191238	0.782497	1.21577
Ao3042_00206	AO1008_01819	0.416799	0.824632	0.525409	0.259529	1.06083	0.687599
Ao3042_00207	AO1008_01820	0	0	0	0	0	0.0564864
Ao3042_00209	AO1008_01822	0	0	0	0	0	0
Ao3042_00210	AO1008_01823	0	0.600538	0	0.377104	0	1.19797
Ao3042_00211	AO1008_01824	0	0	0	0.151394	0	0.641722
Ao3042_00212	AO1008_01825	5.30669	5.48921	5.63304	11.2365	8.99054	7.98412
Ao3042_00213	AO1008_01826	1.62931	1.93681	1.84971	0.304711	0.207664	1.77594
Ao3042_00214	AO1008_01827	1.15559	0	7.01	0	0.887603	0.459453
Ao3042_00215	AO1008_01828	0.159526	0.117957	0.752883	0	0	0.0787405
Ao3042_00216	AO1008_01829	0	0	0	0	0	0
Ao3042_00217	AO1008_01830	0	0	0	0	0	0
Ao3042_00218	AO1008_01831	0	0	0	0	0.118037	0
Ao3042_00219	AO1008_01832	0	0	0.336777	0	0.226243	0.0880694
Ao3042_00220	AO1008_01833	8.25235	11.2222	17.3019	11.5999	11.777	31.0706
Ao3042_00221	AO1008_01834	0	0	0.451116	0	0	0
Ao3042_00222	AO1008_01835	0.465645	0.114755	0	0	0.295125	0.383026
Ao3042_00223	AO1008_01836	10.6758	25.666	36.5539	2.6872	4.59256	5.6918
Ao3042_00224	AO1008_01837	3.53618	0.990251	2.888	1.78157	1.69801	2.36037
Ao3042_00226	AO1008_01839	0.313225	1.6284	1.48139	0.146402	0.399058	5.43003
Ao3042_00227	AO1008_01840	3.34249	12.6602	6.9259	24.6023	33.8006	22.9384
Ao3042_00228	AO1008_01841	3.18376	377.88	94.3929	4.5655	43.1977	116.93
Ao3042_00229	AO1008_01842	0	0	0	1.11414	0	0
Ao3042_00230	AO1008_01843	39.6872	1594.02	328.347	10.1679	170.889	29.401
Ao3042_00231	AO1008_01844	138.036	208.201	88.7854	10.5877	37.6619	6.70301
Ao3042_00232	AO1008_01845	5.6685	4.9855	0.852565	1.78074	1.99485	0.160832
Ao3042_00233	AO1008_01846	311.572	226.571	150.829	936.588	832.556	560.719
Ao3042_00234	AO1008_01847	1.54543	2.03222	5.51169	1.35976	2.1778	1.18692
Ao3042_00235	AO1008_01848	3.29278	10.3541	16.185	1.22976	1.67536	2.73691
Ao3042_00236	AO1008_01849	141.443	140.484	144.105	165.764	94.5072	108.722
Ao3042_00237	AO1008_01850	7.50443	3.79448	4.26614	2.34248	3.05715	5.52372
Ao3042_00239	AO1008_01852	3.32618	4.17364	4.35287	2.62732	1.78956	4.55636
Ao3042_00240	AO1008_01853	67.5465	72.94	115.611	80.588	111.611	150.393
Ao3042_00241	AO1008_01854	76.8761	46.1356	43.6606	71.3893	62.5667	43.5675
Ao3042_00242	AO1008_01855	19.6591	9.31513	11.7228	35.8994	32.6012	24.2463
Ao3042_00243	AO1008_01856	3.36377	3.2617	1.16544	4.61179	2.40774	3.12226
Ao3042_00244	AO1008_01857	0.428565	0	0.60724	0	0.272137	0.211797
Ao3042_00245	AO1008_01858	0.0944547	0.279602	1.96222	0.0880318	0.239719	0
Ao3042_00246	AO1008_01859	98.4448	112.819	109.493	48.29	84.3579	162.998
Ao3042_00247	AO1008_01860	1.58064	2.5236	3.0656	1.09733	1.43355	4.16399
Ao3042_00248	AO1008_01861	0	0	0	0	0	0.651323
Ao3042_00249	AO1008_01862	0	0	0	0	0	0
Ao3042_00250	AO1008_01863	71.001	137.21	179.156	59.4079	97.442	134.149
Ao3042_00251	AO1008_01864	12.2698	21.1863	44.7065	7.45196	15.4087	18.4214
Ao3042_00252	AO1008_01865	6.09579	10.0225	13.0196	11.2888	16.8902	13.441
Ao3042_00254	AO1008_01867	2.63229	0.678345	1.0813	20.4995	28.7923	1.69737
Ao3042_00255	AO1008_01868	0.75995	0.378373	1.44151	0.237916	0	0.252047
Ao3042_00256	AO1008_01869	70.5649	35.1787	72.9442	101.775	126.89	59.2381
Ao3042_00257	AO1008_01870	60.6149	46.4764	25.9711	4.96666	13.9223	17.08
Ao3042_00258	AO1008_01871	0	0	0	0	0	1.08494
Ao3042_00259	AO1008_01872	0	0	0	0	0	0
Ao3042_00260	AO1008_01873	0.198028	0.146588	0.187018	0	0.125682	0
Ao3042_00261	AO1008_01874	0	0	0	0	0	0
Ao3042_00262	AO1008_01875	0.489445	0.144913	0.184887	0.547486	0.24849	0.483567
Ao3042_00265	AO1008_09631	6.2259	5.44065	6.7478	12.7512	11.0142	13.7166
Ao3042_00266	AO1008_01513	11.4522	8.90162	6.99561	31.9768	21.2143	14.7599
Ao3042_00267	AO1008_01512	0.209082	0.309638	0	0.292439	0.398233	0.103317
Ao3042_00269	AO1008_01510	0	0	0	1.83342	0.25003	0
Ao3042_00270	AO1008_01509	0.463147	0.684388	0.249715	1.47794	0.586654	0.652756
Ao3042_00271	AO1008_01508	8.09859	21.5804	21.7532	2.8213	10.3389	14.3868
Ao3042_00272	AO1008_01507	26.5426	23.5336	39.9174	45.8786	52.5949	89.2839
Ao3042_00273	AO1008_01506	26.7841	11.6209	2.76706	22.2434	27.7662	17.8883
Ao3042_00274	#N/A	192.259	141.499	168.186	211.981	240.418	239.842
Ao3042_00275	#N/A	20.6576	27.7474	36.0687	19.4717	25.5217	21.1825
Ao3042_00276	AO1008_11995	749.291	1163.26	1632.53	39.168	270.103	989.578
Ao3042_00277	AO1008_11994	14.3575	30.2394	25.1956	7.61849	11.8983	40.3779
Ao3042_00278	AO1008_11993	1.7253	3.51516	3.81645	0.94102	1.95847	2.22971
Ao3042_00279	AO1008_11992	208.129	123.037	113.794	181.73	215.898	106.93
Ao3042_00280	AO1008_11991	123.987	121.8	109.723	113.053	103.068	160.151
Ao3042_00281	AO1008_11990	110.889	57.2645	41.1767	138.13	178.293	163.192
Ao3042_00282	AO1008_11989	785.163	412.87	413.895	733.436	1341.08	1428.89
Ao3042_00283	AO1008_11988	548.503	518.597	485.858	1273.28	1318.74	2063.44
Ao3042_00284	AO1008_11987	76.5348	38.6419	33.7849	69.464	61.0995	51.137
Ao3042_00285	AO1008_11986	102.964	113.078	131.736	211.529	151.277	184.375
Ao3042_00286	AO1008_11985	35.1376	48.9634	55.1409	44.9353	50.5009	81.2664
Ao3042_00287	AO1008_11984	11.416	14.0609	17.1747	13.8455	17.3142	20.6643
Ao3042_00289	AO1008_11982	9.97712	10.0771	11.6382	25.1583	18.2034	12.1721
Ao3042_00290	AO1008_11981	18.0109	12.7088	18.0937	13.2366	17.5998	18.5164
Ao3042_00291	AO1008_11980	5.28218	2.798	4.61365	15.7858	13.4923	14.8645
Ao3042_00292	AO1008_11979	16.7269	22.8863	43.8968	3.27209	10.0753	11.6434
Ao3042_00293	AO1008_11978	7.7452	8.6181	15.2435	4.60893	11.8087	19.6777
Ao3042_00294	AO1008_11977	3.24587	5.25653	3.79299	3.31051	3.42864	4.88213
Ao3042_00295	AO1008_11976	1.14072	1.28026	0	1.07304	0.732713	2.27331
Ao3042_00296	AO1008_11975	2.23743	2.48617	2.32515	0.939168	1.13695	4.31332
Ao3042_00297	AO1008_11974	0	0.882395	0	0	0	0.196064
Ao3042_00298	AO1008_11973	0.611595	2.70776	0.906263	0.284306	0.221022	0.129165
Ao3042_00299	AO1008_11972	20.083	18.5976	18.1251	20.0081	21.3481	22.735
Ao3042_00300	AO1008_11971	110.637	47.4703	85.4834	55.192	127.892	94.1492
Ao3042_00301	AO1008_11970	21.8153	20.6902	22.3235	23.1333	23.8399	19.3529
Ao3042_00302	AO1008_11969	15.6407	12.1306	11.1334	18.9071	21.7175	13.1252
Ao3042_00303	AO1008_11968	13.4005	11.7822	15.3526	16.022	14.6626	11.6035
Ao3042_00304	AO1008_11967	140.106	108.459	103.787	165.151	135.8	137.097
Ao3042_00305	AO1008_11966	122.848	127.533	164.123	51.8835	72.8026	92.9189
Ao3042_00306	AO1008_11965	258.377	236.963	272.194	214.334	284.311	230.613
Ao3042_00307	AO1008_11964	4.26261	6.55236	9.1524	1.55712	3.70954	4.29121
Ao3042_00308	AO1008_11963	2.93835	2.68847	2.50869	1.95379	3.81146	2.62327
Ao3042_00309	AO1008_11962	17.7063	11.2244	13.1509	13.7894	19.0041	16.2272
Ao3042_00310	AO1008_11613	52.3018	56.3021	50.9674	56.8588	51.862	32.2553
Ao3042_00311	AO1008_11612	7.28227	6.45134	11.0191	5.71777	7.33572	5.35044
Ao3042_00312	AO1008_11611	106.23	103.097	101.838	255.08	148.03	139.699
Ao3042_00313	AO1008_11610	74.0264	60.6112	66.1355	75.8793	59.085	56.1203
Ao3042_00314	AO1008_11609	21.2813	13.0541	11.6815	22.5941	61.8543	9.47002
Ao3042_00315	AO1008_11608	96.8965	91.5329	59.337	171.318	114.267	110.746
Ao3042_00316	AO1008_11607	460.992	552.9	576.601	253.63	359.963	372.813
Ao3042_00317	AO1008_11606	367.281	333.072	452.345	840.86	369.712	520.752
Ao3042_00318	AO1008_11605	0.778257	0	0.984319	0	0.665412	0.25819
Ao3042_00319	AO1008_11604	130.193	148.51	167.409	249.271	231.264	223.623
Ao3042_00320	AO1008_11603	7.87551	3.95806	5.06018	8.19398	7.26857	5.43275
Ao3042_00321	AO1008_11602	0.610592	0.451396	2.59328	0.497503	0.19348	0.979341
Ao3042_00322	AO1008_11601	46.3422	35.0951	37.4451	73.5769	69.9752	89.3702
Ao3042_00323	AO1008_11600	176.628	157.346	190.537	221.19	174.982	161.526
Ao3042_00324	AO1008_11599	163.681	114.409	126.558	224.135	167.247	178.764
Ao3042_00325	AO1008_11598	1.34412	1.85627	2.70732	0.834951	1.25041	3.62844
Ao3042_00326	AO1008_11597	13.301	8.50781	15.6136	10.8289	15.2506	20.3562
Ao3042_00328	AO1008_11595	10.021	18.6305	15.7213	8.6106	14.0974	9.755
Ao3042_00329	AO1008_11594	1.96908	3.5583	2.99966	1.48967	1.019	3.5493
Ao3042_00330	AO1008_11593	258.594	204.926	208.248	97.773	182.831	208.352
Ao3042_00332	AO1008_11591	0.0353937	5.37754	17.6847	0	0	0.627661
Ao3042_00333	AO1008_11590	49.786	69.9552	96.9653	48.4595	73.2055	65.1467
Ao3042_00334	AO1008_11589	2695.36	7193.54	2371.85	4001.33	4479.7	2230.25
Ao3042_00335	AO1008_11588	6.52005	5.53332	7.45684	9.21546	6.82163	6.32697
Ao3042_00336	AO1008_11587	86.5839	68.2562	66.6542	154.51	121.966	107.63
Ao3042_00337	AO1008_11586	110.64	265.25	203.595	183.767	213.945	290.838
Ao3042_00338	AO1008_11585	0.502273	1.48947	4.74692	1.52367	3.5125	8.07402
Ao3042_00339	AO1008_11584	8.6127	12.8703	20.7969	12.506	9.03841	10.1312
Ao3042_00340	AO1008_11583	248.082	32.7145	63.2938	198.431	499.234	149.444
Ao3042_00341	AO1008_11582	15.1112	9.3728	6.83482	24.0304	16.9896	10.5456
Ao3042_00342	AO1008_11581	10.5304	7.96651	14.9625	18.2414	18.6384	19.2735
Ao3042_00343	AO1008_11580	29.0114	37.7149	28.9903	29.349	42.5815	28.1961
Ao3042_00344	AO1008_11579	38.8203	22.2566	13.526	2.71337	7.61564	10.6061
Ao3042_00345	AO1008_11578	22.9863	18.2362	24.351	27.2945	26.8489	22.155
Ao3042_00346	AO1008_11577	12.1164	2.29364	4.46237	19.3295	17.9766	6.56226
Ao3042_00347	AO1008_11576	26.4245	14.2116	14.4164	78.3694	39.4626	43.2104
Ao3042_00348	AO1008_11575	41.2346	25.9044	35.6381	44.3728	40.3928	54.0406
Ao3042_00349	AO1008_11574	100.276	72.0144	53.0685	60.1564	89.0967	45.1777
Ao3042_00350	AO1008_11573	198.693	210.073	257.008	185.179	193.91	262.248
Ao3042_00351	AO1008_11572	32.346	21.4988	37.7895	35.5872	42.8814	32.273
Ao3042_00352	AO1008_11571	147.422	141.246	131.059	190.589	179.605	161.287
Ao3042_00353	AO1008_11570	3.11984	2.17432	4.55667	7.36273	7.24321	6.44683
Ao3042_00354	AO1008_11569	31.4137	39.4778	29.0043	27.5971	31.621	31.7006
Ao3042_00355	AO1008_11568	3.17218	3.19853	2.4473	2.4978	2.27236	3.10461
Ao3042_00356	AO1008_05347	30.3114	21.9718	30.6391	19.701	18.1324	33.5991
Ao3042_00357	AO1008_05346	62.8258	43.0065	65.1423	67.2517	56.474	55.1004
Ao3042_00358	AO1008_05345	33.6911	28.378	51.4137	87.0772	69.1721	63.0117
Ao3042_00359	AO1008_05344	2.08271	8.51234	10.6644	1.99885	1.8321	4.22941
Ao3042_00360	AO1008_05343	33.8358	22.7288	35.094	28.9646	42.3237	37.859
Ao3042_00361	AO1008_05342	74.7401	51.9585	64.7956	50.2599	75.042	112.585
Ao3042_00362	AO1008_05341	166.69	133.814	111.463	329.848	215.545	233.746
Ao3042_00363	AO1008_05340	22.1457	11.9212	22.6382	33.1834	29.4113	33.4008
Ao3042_00364	AO1008_08474	74.1021	63.3866	73.5964	33.0577	41.2707	33.7606
Ao3042_00365	AO1008_08475	8.38664	9.41559	6.88958	3.54343	20.0806	116.663
Ao3042_00366	AO1008_08476	13.0671	21.0901	19.2902	15.4234	18.6905	20.8242
Ao3042_00367	AO1008_08477	20.2423	37.0425	27.5825	28.7175	34.2745	50.5942
Ao3042_00368	AO1008_08478	0.17019	0.100313	0.320731	0.221236	0.171919	0.150779
Ao3042_00369	AO1008_08479	0	0	0.174546	0	0	0
Ao3042_00370	AO1008_08480	0	0.310396	0.593906	0	0	0.103569
Ao3042_00371	AO1008_08481	0.146008	0.431678	1.5157	0.135939	0.277537	0.576369
Ao3042_00372	AO1008_08482	0	0	0	0	0	0.219416
Ao3042_00373	AO1008_08483	0.297042	0.293175	0.561053	0.184603	0.502727	0.48915
Ao3042_00374	AO1008_08484	0.682373	1.54007	2.2909	0.435692	0.700271	0.776827
Ao3042_00375	AO1008_08485	0.585055	2.19211	1.42444	0.249073	0.43114	0.960187
Ao3042_00376	AO1008_08486	103.504	24.9229	52.8592	10.097	18.0062	20.0628
Ao3042_00377	AO1008_08487	2.90264	2.21726	2.65243	3.66504	2.49503	1.0174
Ao3042_00378	AO1008_08488	0.289054	1.07264	0.819972	1.35025	0.551966	0.429279
Ao3042_00379	AO1008_08489	23.3511	27.5861	29.7779	83.6126	44.9792	30.373
Ao3042_00380	AO1008_08490	5.72048	4.97752	6.35318	4.62354	4.3739	3.98701
Ao3042_00381	AO1008_08491	1.79693	2.41606	3.39243	1.44548	1.657	2.17724
Ao3042_00382	AO1008_08492	6.55857	9.1295	9.42924	23.5419	20.5004	19.5361
Ao3042_00383	AO1008_08493	5.23811	8.20757	6.87944	3.94238	6.29827	5.76264
Ao3042_00384	AO1008_08494	11.7873	16.6324	10.3936	3.7698	10.411	10.8764
Ao3042_00385	AO1008_08495	30.8034	24.6444	11.3317	7.28217	19.1243	8.34255
Ao3042_00386	AO1008_08496	1.97553	1.47066	0	0.9252	0.504704	0.196064
Ao3042_00387	AO1008_08497	6.88749	8.52708	9.8944	13.3547	14.014	8.82827
Ao3042_00388	AO1008_08498	26.7794	23.8255	54.7504	4.43009	23.3423	166.245
Ao3042_00390	AO1008_08500	30.4098	44.5173	29.8755	48.8535	67.4012	62.9438
Ao3042_00392	AO1008_08502	0.711719	1.06942	0.676925	0	0	0
Ao3042_00393	AO1008_08503	0.384551	2.66126	1.93846	0.837635	3.74928	7.10182
Ao3042_00394	AO1008_08504	1.42648	4.85627	4.24618	5.15521	5.98956	21.8489
Ao3042_00395	AO1008_08505	0.64864	0.577191	0.980948	0	0	0.513419
Ao3042_00396	AO1008_08506	0.230744	15.4667	57.4945	0	0.877431	1.67021
Ao3042_00397	AO1008_08507	1.06201	1.3991	1.11498	8.03743	6.59843	11.3189
Ao3042_00398	AO1008_08508	7.08169	13.6308	12.211	12.5235	19.1128	53.4592
Ao3042_00399	AO1008_08509	0	0	0	0	0	0
Ao3042_00400	AO1008_08510	4.2195	6.32862	4.93507	1.22362	4.59836	3.24001
Ao3042_00401	AO1008_08511	6.48543	13.6838	13.437	3.37586	6.50145	5.55173
Ao3042_00402	AO1008_08512	2.2535	3.63274	1.77784	1.75814	10.788	33.7193
Ao3042_00403	AO1008_08513	0	0	0	0	0	0
Ao3042_00404	AO1008_08514	1.86565	1.89997	1.03908	1.19221	0.930813	0.724638
Ao3042_00405	AO1008_08515	10.8094	10.2568	6.63741	3.0019	9.17645	10.218
Ao3042_00406	AO1008_08516	1.02941	0	1.95285	0.967015	1.65006	3.84164
Ao3042_00407	AO1008_08517	1.98725	2.99324	1.51382	0	1.02864	0
Ao3042_00408	AO1008_08518	0.463102	0.917055	0.292013	0	0	0.152904
Ao3042_00409	AO1008_08519	3.94135	6.38726	6.03726	2.08608	4.73473	7.5805
Ao3042_00410	AO1008_08520	24.0878	46.659	36.7135	22.5544	53.6533	52.8734
Ao3042_00411	AO1008_08521	0.308384	0.152218	0.194179	0.191686	0.261024	0.304748
Ao3042_00412	AO1008_08522	1.77935	3.04615	5.69348	0.766964	2.43823	4.33498
Ao3042_00413	AO1008_08523	10.8113	19.52	30.7219	11.2703	21.7669	25.1632
Ao3042_00414	#N/A	14.447	20.696	42.6997	17.9195	25.7824	22.3039
Ao3042_00415	AO1008_08525	5.44053	8.52198	5.73177	2.04874	5.18124	8.78905
Ao3042_00416	AO1008_08526	4.35249	5.23304	14.5546	5.5767	6.55715	8.06028
Ao3042_00417	AO1008_08527	6.41961	6.4797	5.63699	6.44736	6.92271	21.3806
Ao3042_00418	AO1008_08528	21.8216	12.1459	25.249	8.98598	19.0061	15.7768
Ao3042_00419	AO1008_08529	15.9055	32.1019	37.4545	3.87266	12.3463	17.4165
Ao3042_00420	AO1008_08530	2.39996	3.69456	2.7196	2.68432	6.94433	31.6757
Ao3042_00421	AO1008_08531	0	0	0.211929	0	0	0.443549
Ao3042_00422	AO1008_08532	0	0	0	0	0	0
Ao3042_00423	AO1008_08533	2.01271	3.92912	2.43179	1.72462	1.93935	2.22541
Ao3042_00424	AO1008_08534	0.6108	0	0.580129	2.30049	1.17854	0.304592
Ao3042_00425	AO1008_08535	0.483742	0	0	0.918954	0	1.45927
Ao3042_00426	AO1008_08536	0.508675	2.01636	0.96265	0.317207	0.432405	1.0084
Ao3042_00427	AO1008_08537	24.6099	47.9109	22.9514	7.45172	12.4688	8.25498
Ao3042_00428	AO1008_08538	0	0	0	0	0	0
Ao3042_00429	AO1008_08539	0.162291	0.508277	0.152937	0	0.0256211	0.059918
Ao3042_00430	AO1008_08540	0.34003	0	0	0	0	0.224121
Ao3042_00431	AO1008_08541	0	3.10357	12.4462	0	0	1.37672
Ao3042_00432	AO1008_08542	0	0	2.72646	0	0	0.362122
Ao3042_00433	AO1008_08543	0	2.70427	35.2288	0	0	0.900994
Ao3042_00434	AO1008_08544	0.130514	0	0	0	0	0
Ao3042_00435	AO1008_08545	5.21103	7.87554	13.461	0	1.7557	1.05111
Ao3042_00436	AO1008_08546	0.45652	10.2136	54.9496	0	1.75293	2.94914
Ao3042_00437	AO1008_08547	2.46534	3.02099	2.63197	1.25433	2.70693	2.33838
Ao3042_00438	AO1008_08548	3.01253	1.60996	1.69329	1.72986	2.5977	2.27628
Ao3042_00439	AO1008_08549	0.192713	0.713155	0.181984	0.269437	0.48915	0.38077
Ao3042_00440	AO1008_08550	5.47484	5.51474	3.75652	2.83678	4.01802	6.25952
Ao3042_00441	AO1008_08551	4.01304	4.74059	2.72533	2.04058	2.37024	5.38138
Ao3042_00442	AO1008_08552	8.79259	3.98275	1.97308	3.20298	2.84659	3.39431
Ao3042_00443	AO1008_08553	88.4657	37.1321	45.6888	36.7496	58.1394	159.981
Ao3042_00444	AO1008_08554	5.29102	4.82079	3.87615	0.798297	0.435292	4.568
Ao3042_00445	AO1008_08555	1.29728	4.61753	0.490474	2.42225	1.64992	2.82381
Ao3042_00446	AO1008_08556	0.261393	0.128907	0.164519	0	0	0
Ao3042_00447	AO1008_08557	9.27096	7.47267	6.77756	3.18912	3.71871	6.31875
Ao3042_00449	AO1008_08559	28.6835	25.2133	14.8122	12.7713	9.96659	3.41657
Ao3042_00450	AO1008_08560	5.11256	1.34161	2.64657	0.768088	1.77751	1.13979
Ao3042_00451	AO1008_08561	0.157184	0.466969	0.892092	0.734702	1.60212	0.155714
Ao3042_00452	AO1008_08562	0	0.74086	0.934083	0	0	0.492071
Ao3042_00453	AO1008_08563	0	0	0	0	0.216202	0
Ao3042_00454	AO1008_08564	0.125568	0.55855	0.712038	0	0.159659	0.248431
Ao3042_00455	AO1008_05708	1.35283	3.69865	0.427356	0.211478	0.577071	1.5684
Ao3042_00456	AO1008_02602	8.99483	9.43915	9.29388	4.78859	8.09876	13.3948
Ao3042_00457	AO1008_07290	484.783	58.0985	58.4141	136.927	365.978	44.2366
Ao3042_00458	AO1008_03629	8.41481	8.13845	2.28043	1.97878	4.28314	50.7721
Ao3042_00459	#N/A	16.079	10.4801	4.96611	6.26028	5.18658	46.3061
Ao3042_00460	AO1008_08565	0	0.197982	0.379241	0	0.0848548	0
Ao3042_00462	AO1008_08567	10.2726	7.30666	6.84839	5.72739	12.5294	19.5049
Ao3042_00463	AO1008_08568	7.58542	9.15176	7.77707	4.56082	11.6087	11.1935
Ao3042_00464	AO1008_08569	1.07863	1.51313	1.93305	1.30432	0.682599	0.957204
Ao3042_00465	AO1008_08570	1.92364	1.42897	3.03292	2.84771	1.63424	2.85888
Ao3042_00466	AO1008_08571	4.02101	2.58482	4.56132	4.38055	3.75134	3.44866
Ao3042_00467	AO1008_08572	0.772364	0.685223	1.31217	1.00694	0.489511	1.29604
Ao3042_00468	AO1008_08573	0.690003	1.79523	16.9769	0.806893	0.659988	1.71006
Ao3042_00469	AO1008_08574	1.91026	1.54922	3.94419	1.94967	5.75875	8.95254
Ao3042_00470	AO1008_04114	4.06534	2.60427	1.24555	1.33223	3.90779	5.97373
Ao3042_00471	AO1008_04115	0.645985	0.641852	0.408016	0	0	0.641636
Ao3042_00472	AO1008_04116	0	0.416647	0.177215	0	0.119071	1.01963
Ao3042_00473	AO1008_04117	0	0	0	0	0	0
Ao3042_00474	AO1008_04118	123.154	15.3153	32.9234	4.86548	16.4428	9.20891
Ao3042_00476	AO1008_04120	1.88949	3.87681	4.03017	3.54628	7.25893	11.0365
Ao3042_00477	AO1008_04121	1.79686	2.19817	1.54947	1.6712	3.57324	6.52943
Ao3042_00478	AO1008_04122	36.3501	50.5775	42.3462	12.2174	34.9877	44.9214
Ao3042_00479	AO1008_06265	7.12013	11.706	7.09122	7.3548	7.8676	7.45089
Ao3042_00480	AO1008_06266	75.2015	42.2234	72.9432	113.177	122.466	100.01
Ao3042_00481	AO1008_06267	177.315	178.772	187.274	276.068	199.116	202.466
Ao3042_00482	AO1008_06268	509.823	611.092	246.416	26.7399	121.534	268.447
Ao3042_00483	AO1008_06269	141.673	152.752	162.746	109.811	128.081	124.178
Ao3042_00485	AO1008_06271	11.1797	11.1501	5.04811	1.59608	3.99695	3.99273
Ao3042_00486	AO1008_06272	540.1	449.442	487.484	278.917	289.077	313.448
Ao3042_00487	AO1008_06273	101.288	126.613	132.496	150.181	102.564	164.568
Ao3042_00488	AO1008_06274	114.01	178.469	154.102	304.9	160.791	97.0864
Ao3042_00489	AO1008_06275	154.424	180.295	132.171	310.147	226.754	157.613
Ao3042_00490	AO1008_06276	1.74922	2.23907	3.31767	3.98916	3.20285	3.72895
Ao3042_00491	AO1008_06277	0	0.178833	1.14004	0	0	0.119318
Ao3042_00492	AO1008_06278	1.02713	1.21677	1.35817	4.69257	1.43449	0.710511
Ao3042_00493	AO1008_06279	6.80014	4.40739	11.8807	3.09957	9.11828	7.95187
Ao3042_00494	AO1008_06280	88.9153	83.4032	76.9303	122.728	155.999	143.598
Ao3042_00495	AO1008_06281	58.8434	101.76	183.719	23.3182	82.7263	116.271
Ao3042_00496	AO1008_06282	11.9188	6.15914	9.21775	14.184	20.2932	14.9709
Ao3042_00497	AO1008_06283	35.6056	29.0243	19.2149	40.7199	57.7469	25.9887
Ao3042_00498	AO1008_06284	30.5573	32.4536	39.9413	37.3443	40.9985	33.9268
Ao3042_00499	AO1008_06285	190.981	229.802	327.214	84.9033	100.726	312.073
Ao3042_00500	AO1008_06286	0	0	0	0	0	0
Ao3042_00501	AO1008_06287	59.607	48.1655	43.5535	100.101	75.4739	97.8464
Ao3042_00502	AO1008_06288	17.3716	18.1725	13.4716	21.0104	16.3765	16.3922
Ao3042_00503	AO1008_06289	47.5316	46.8711	38.1113	30.7794	39.8685	49.7956
Ao3042_00504	AO1008_06290	8.76012	4.01245	5.06782	13.2354	9.23085	5.62875
Ao3042_00505	AO1008_06291	4.43786	4.55357	2.90244	6.9661	5.59591	5.72567
Ao3042_00506	AO1008_06292	0	0	0	0	0	0
Ao3042_00507	AO1008_06293	35.9331	39.3796	59.0978	36.6116	52.1886	34.4272
Ao3042_00508	AO1008_06294	25.0055	74.0637	65.0259	6.14621	17.5365	26.7807
Ao3042_00509	AO1008_06295	8.42113	15.275	21.7158	15.1034	10.7983	11.6262
Ao3042_00510	AO1008_06296	8.70732	6.72765	7.16548	11.1538	18.6005	7.87535
Ao3042_00511	AO1008_06297	168.575	139.03	146.542	191.081	169.708	127.71
Ao3042_00512	AO1008_06298	4.75381	7.55937	12.9147	7.91272	10.4959	16.9169
Ao3042_00513	AO1008_06299	29.4528	52.9106	81.0664	92.3202	150.229	155.695
Ao3042_00514	AO1008_06300	0.717358	0	1.37833	0	0	0
Ao3042_00515	AO1008_06301	0.426294	0	0.812491	0	0	0
Ao3042_00516	AO1008_06302	1.67766	7.55354	20.4128	0.632797	2.16225	1.00532
Ao3042_00517	AO1008_06303	31.851	28.971	10.3838	10.459	12.0827	15.1289
Ao3042_00518	AO1008_06304	0	0	0	0	0	0
Ao3042_00519	AO1008_06305	0.33065	0.586317	0.873555	1.41563	1.67529	2.0225
Ao3042_00520	#N/A	0	0	0.0966115	0	0	0.201981
Ao3042_00521	AO1008_01077	0	0	0	0	0	0
Ao3042_00522	AO1008_01078	0	1.04649	0	0	1.80173	0
Ao3042_00523	AO1008_01079	0.234048	0	0.887431	0	0.299675	0
Ao3042_00524	AO1008_01080	1.25452	1.48452	2.52644	0.0779068	0.212112	0.660616
Ao3042_00525	AO1008_01081	109.532	92.6025	63.5777	81.6936	113.793	95.8921
Ao3042_00526	AO1008_01082	14.7654	12.3742	17.8776	23.7844	14.5227	18.311
Ao3042_00527	AO1008_01083	14.4411	9.45776	18.2311	12.9823	14.2611	30.9508
Ao3042_00528	AO1008_01084	120.99	83.9447	90.2652	134.512	173.596	93.7977
Ao3042_00529	AO1008_01085	16.2005	17.3071	23.4116	21.7275	19.7495	25.7848
Ao3042_00531	AO1008_02642	0.219722	0.655114	0.832782	0	1.12429	5.67544
Ao3042_00532	AO1008_02643	6.87745	5.09245	3.93696	3.2064	6.21872	7.82661
Ao3042_00533	AO1008_02644	0	2.18857	20.771	0.0861345	0.351817	3.83441
Ao3042_00534	AO1008_02645	0.950112	2.93897	1.30469	0.241407	4.92968	32.8374
Ao3042_00535	AO1008_02646	0	0	3.50147	0	0	0
Ao3042_00536	AO1008_02647	0.0802086	0	0.15142	0	0.101689	0.079182
Ao3042_00537	AO1008_02648	0	0.226804	0	0.428225	0.194528	0.151267
Ao3042_00538	AO1008_02649	0.613838	0.605961	0.579761	0.381543	0.259776	1.01098
Ao3042_00539	AO1008_02650	0.763628	2.26804	0.866682	1.85564	0.972642	0.302533
Ao3042_00540	AO1008_02651	0.398676	0.600538	1.51854	0	0	0
Ao3042_00541	AO1008_02652	0	0.433894	0.138497	0.136636	0.0929873	0
Ao3042_00542	AO1008_02653	2.59661	1.94727	0.616883	1.22362	0.418033	3.24001
Ao3042_00543	AO1008_02654	0	0	0	0	0	0
Ao3042_00544	AO1008_02655	0.456588	0.405401	0	0.255286	0	0
Ao3042_00545	AO1008_02656	0	0	0	0.391895	0	0.829931
Ao3042_00546	AO1008_02657	0	0.83886	1.0556	0	0	0.556724
Ao3042_00547	AO1008_02658	0.0859715	1.39902	2.11022	0	0	0.679146
Ao3042_00548	AO1008_02659	0.666067	1.53173	0.698445	0.206721	0.28137	1.09559
Ao3042_00549	AO1008_02660	12.2863	14.0208	15.316	4.41279	11.5088	19.2408
Ao3042_00550	AO1008_02661	0.184837	1.09999	0.699891	0	0	0.733354
Ao3042_00551	AO1008_02662	1.2448	0.184558	0.941126	1.27802	0.633056	0.985062
Ao3042_00552	AO1008_02663	0	0	0.345476	0	0	0
Ao3042_00553	AO1008_02664	3.0959	6.6472	7.93042	1.23535	3.17606	3.34636
Ao3042_00554	AO1008_02665	1.59517	2.56338	1.25657	1.24122	0.507301	1.18388
Ao3042_00555	AO1008_02666	9.53119	14.5412	10.6302	4.94242	11.9413	8.4461
Ao3042_00556	AO1008_02667	0.729506	0	0	0	0.964839	0
Ao3042_00557	AO1008_02668	150.994	318.581	268.646	105.656	198.871	172.574
Ao3042_00558	AO1008_02669	88.2718	32.2232	9.22139	187.776	231.377	20.516
Ao3042_00559	AO1008_02670	20.4323	20.62	13.7729	36.0277	46.2902	86.0779
Ao3042_00560	AO1008_02671	0	0	0.181172	0	0	0.189533
Ao3042_00561	AO1008_02672	0	0	1.12904	0	0	0
Ao3042_00562	AO1008_02673	0	1.70314	19.0999	0.459675	0.521458	0.0812054
Ao3042_00563	AO1008_02674	23.5061	13.5831	10.0362	64.7153	53.7254	127.156
Ao3042_00564	AO1008_02675	6.76241	2.68501	2.28223	9.24049	13.8145	29.8576
Ao3042_00565	AO1008_02676	0	0	0	0	0	0
Ao3042_00566	AO1008_02677	1.99187	1.2774	1.62065	0.80298	1.46214	1.98471
Ao3042_00567	AO1008_02678	1.20983	0.717353	0.914605	0.451605	1.53785	0.957243
Ao3042_00568	AO1008_02679	1.83017	1.9896	0.691802	2.50506	1.24081	1.0861
Ao3042_00569	AO1008_02680	10.5583	92.1454	91.4456	0.877415	4.39545	5.2664
Ao3042_00570	AO1008_02681	3.71458	6.47688	3.79162	0.679946	2.62166	13.6943
Ao3042_00571	AO1008_02682	0.241986	0.214331	0.182571	0	0.122467	0.0477091
Ao3042_00572	AO1008_02683	0	0	0	0	0.401555	0
Ao3042_00573	AO1008_02684	2.2493	3.70554	3.54292	10.6138	3.01874	0.988893
Ao3042_00574	AO1008_02685	10.033	4.35163	2.48859	19.7471	14.7957	9.11293
Ao3042_00575	AO1008_02686	0.114854	0.170193	0.217031	0.2143	1.6053	1.36275
Ao3042_00576	AO1008_02687	1.2825	3.32424	0.807638	0.996676	2.71457	3.48595
Ao3042_00577	AO1008_02688	0	0	0	0	0	0
Ao3042_00578	AO1008_02689	0.270324	1.20001	0.85077	0.0839629	1.25743	2.31385
Ao3042_00579	AO1008_02690	0	0	0	0.0896109	0.122013	0
Ao3042_00580	AO1008_02691	0.0811148	0.479861	0.153134	0.0755504	0	0.320319
Ao3042_00581	AO1008_02692	0	0	0	0.434501	0	0
Ao3042_00582	AO1008_02693	10.1788	21.6932	9.12532	3.35285	5.7164	6.47862
Ao3042_00583	AO1008_02694	10.3873	15.8636	11.6314	4.96351	12.1948	5.3296
Ao3042_00584	AO1008_02695	3.78958	2.84516	2.6961	1.15619	3.46151	3.12523
Ao3042_00585	AO1008_02696	11.8328	8.54671	9.65394	27.6148	17.418	9.72522
Ao3042_00586	AO1008_02697	7.83088	7.30404	5.96857	4.1264	4.65749	2.49897
Ao3042_00587	AO1008_02698	5.31937	5.82692	6.65335	23.2454	13.4703	10.375
Ao3042_00588	AO1008_02699	0	0	0	0	0	0.460018
Ao3042_00589	AO1008_02700	20.1888	18.1697	12.4688	38.5848	17.6369	18.3812
Ao3042_00590	AO1008_02701	2.08378	4.49018	2.63349	0.8689	2.66765	11.277
Ao3042_00591	AO1008_02702	1.89189	2.02046	2.5645	0.508096	3.1218	1.34562
Ao3042_00592	AO1008_02703	1.91203	3.72497	1.52068	4.40946	3.70476	8.8499
Ao3042_00593	AO1008_02704	1.9665	2.82709	2.53809	0.721979	1.83372	2.55111
Ao3042_00594	AO1008_02705	2.04128	1.36016	5.20545	1.99833	2.59157	2.31972
Ao3042_00595	AO1008_02706	12.6544	14.6219	13.0953	3.23387	8.4726	5.9317
Ao3042_00596	AO1008_02707	1.06908	0.907215	2.02226	1.57016	0.778114	2.57153
Ao3042_00597	AO1008_02708	7.77452	1.98085	1.13831	3.43099	3.39596	3.10785
Ao3042_00598	AO1008_02709	83.4384	38.5165	30.6502	84.4219	49.358	42.2562
Ao3042_00599	AO1008_11787	10.452	29.5594	29.4273	4.93322	11.7137	112.536
Ao3042_00600	AO1008_11786	19.4607	9.02541	6.07154	14.3632	23.8395	33.7866
Ao3042_00601	AO1008_11785	41.0204	28.626	21.8017	53.9604	38.7359	35.083
Ao3042_00602	AO1008_11784	78.9397	51.288	55.8977	117.381	84.204	81.0257
Ao3042_00603	AO1008_11783	37.6504	31.6854	20.8247	69.7213	39.6437	36.3542
Ao3042_00604	AO1008_11782	27.1973	27.1297	23.1267	38.9046	41.121	37.542
Ao3042_00605	AO1008_11781	35.8925	27.0298	167.757	4.78069	7.81197	10.8433
Ao3042_00606	AO1008_11780	87.6085	115.059	112.996	61.518	58.7547	105.534
Ao3042_00607	AO1008_11779	45.3458	23.1595	50.5066	14.0974	47.8762	54.7414
Ao3042_00608	AO1008_11778	11.5622	11.6604	11.9391	13.0134	11.5138	9.90192
Ao3042_00609	AO1008_11777	61.3335	63.2313	94.2505	49.6526	58.0145	67.7651
Ao3042_00610	AO1008_11776	26.037	18.7612	22.8751	47.7818	39.7327	30.7984
Ao3042_00611	AO1008_11775	0	1.70151	3.1001	0	0	0
Ao3042_00612	AO1008_11774	0.354465	0.263568	0	0.165843	0.226099	0.175735
Ao3042_00613	AO1008_11773	78.9482	87.828	150.05	140.391	157.388	113.427
Ao3042_00614	AO1008_11772	7.02141	5.75405	5.14847	11.1063	11.7455	6.74286
Ao3042_00615	AO1008_11771	114.388	86.3114	128.134	245.288	163.676	190.587
Ao3042_00616	AO1008_11770	25.3572	71.2801	112.499	4.62229	19.5734	100.247
Ao3042_00617	AO1008_11769	56.8878	62.4237	58.9375	45.462	52.2521	54.2557
Ao3042_00618	AO1008_01500	10.0229	9.26142	7.80602	7.69173	8.4481	11.9752
Ao3042_00619	#N/A	11.7013	15.4926	18.5622	13.3665	14.0084	19.1272
Ao3042_00620	#N/A	0	1.12173	1.42463	0	0	0.498167
Ao3042_00621	#N/A	11.1103	7.85815	13.3487	10.8463	12.7602	15.0201
Ao3042_00622	#N/A	12.8275	10.3804	11.4376	20.8354	20.5585	15.5165
Ao3042_00623	#N/A	25.2957	21.9318	45.846	30.9377	44.2839	40.5067
Ao3042_00624	#N/A	7.76028	8.22729	11.1044	7.50152	11.6055	9.82955
Ao3042_00625	AO1008_09013	300.316	465.257	1437.42	10.2344	38.3019	228.703
Ao3042_00626	AO1008_04456	15.1174	10.7376	18.8029	28.2548	19.3713	17.3534
Ao3042_00627	#N/A	21.0444	22.5067	23.0826	20.1136	22.2279	36.6102
Ao3042_00628	#N/A	14.4967	4.14874	4.74578	21.6197	13.6148	14.1308
Ao3042_00629	#N/A	4.96565	2.19064	5.58857	1.18449	4.96409	1.35746
Ao3042_00630	#N/A	265.512	126.784	162.275	120.96	184.009	356.017
Ao3042_00631	AO1008_01398	1.6344	5.40782	8.89728	0.98572	1.70818	8.54812
Ao3042_00632	AO1008_01397	20.0165	139.347	155.421	15.6483	45.7375	93.9769
Ao3042_00633	AO1008_01396	18.9425	19.9333	40.5929	13.713	21.6597	33.4916
Ao3042_00634	AO1008_01395	1.32998	1.21192	2.8988	0.286157	0.519553	1.51647
Ao3042_00635	AO1008_01394	73.2651	126.535	81.4946	61.5723	78.6684	64.92
Ao3042_00636	AO1008_01393	92.2911	128.862	84.6134	34.0898	128.845	362.518
Ao3042_00637	AO1008_01392	141.213	161.038	88.3682	46.8759	108.204	121.978
Ao3042_00638	AO1008_01391	0.186456	0.137976	0.176061	0	0.473175	0.276267
Ao3042_00639	AO1008_01390	2.20813	1.10675	0	0	0	0
Ao3042_00640	AO1008_01389	6.60059	6.59601	9.55534	3.84908	4.85454	5.01775
Ao3042_00641	AO1008_01388	6.73634	4.66816	9.57996	2.25817	6.16348	4.3063
Ao3042_00642	AO1008_01387	10.7668	7.7335	15.1128	15.1185	12.795	11.0481
Ao3042_00643	AO1008_01386	32.1965	23.6855	25.5789	30.323	23.5579	25.2893
Ao3042_00644	AO1008_01385	150.641	134.254	133.133	79.6116	85.6357	113.199
Ao3042_00645	AO1008_01384	636.679	721.836	788.507	136.557	228.615	790.306
Ao3042_00646	AO1008_01383	2.20586	0.221983	0.757699	3.63904	1.43046	0.830921
Ao3042_00647	AO1008_01382	65.5711	48.2969	48.6482	69.3994	79.2197	58.8637
Ao3042_00648	AO1008_01381	1.49484	1.27297	3.237	0.600536	2.18454	2.96932
Ao3042_00649	AO1008_01380	4.44955	6.05696	4.20099	9.70137	4.85413	7.11883
Ao3042_00650	AO1008_01379	19.4881	17.0127	19.6499	26.6765	20.934	15.2969
Ao3042_00651	AO1008_01378	3.75974	3.34475	1.42131	5.49791	3.50564	3.34728
Ao3042_00652	AO1008_01377	17.9042	17.0943	10.596	42.2467	31.6432	35.9273
Ao3042_00653	AO1008_01376	73.2134	72.2049	68.2281	132.184	121.74	152.283
Ao3042_00654	AO1008_01375	101.15	63.2149	80.8142	208.216	184.078	95.8699
Ao3042_00655	AO1008_01374	79.6505	89.2825	95.4664	32.1961	49.3809	58.9829
Ao3042_00656	AO1008_01373	26.2977	27.3954	17.5413	44.2179	44.4799	37.442
Ao3042_00657	AO1008_01372	1.99874	1.5827	2.40083	3.34987	2.9583	0.953868
Ao3042_00658	AO1008_01371	10.7742	8.66799	16.4624	21.7004	22.2915	22.7849
Ao3042_00659	AO1008_01370	45.0852	55.6942	73.063	73.8153	51.5674	76.6831
Ao3042_00660	AO1008_01369	61.3507	36.0055	27.8669	156.325	78.9215	55.7987
Ao3042_00661	AO1008_01368	56.5637	55.8926	65.5554	89.4625	69.1535	45.2821
Ao3042_00663	AO1008_01366	43.4289	54.4913	48.6734	43.5354	53.694	62.0086
Ao3042_00664	AO1008_01365	40.2414	36.402	36.4126	27.5295	31.9751	20.8931
Ao3042_00665	AO1008_01364	219.761	164.508	171.646	219.897	291.625	206.463
Ao3042_00666	AO1008_09747	43.8372	61.6431	63.1058	19.3794	43.3192	55.9446
Ao3042_00667	AO1008_09746	84.4157	71.5979	75.1704	153.906	95.9336	91.2604
Ao3042_00668	AO1008_09745	148.99	188.181	173.697	396.492	276.745	185.837
Ao3042_00669	AO1008_09744	37.7767	53.55	61.0773	16.4632	35.2478	43.2388
Ao3042_00670	AO1008_09743	65.5729	65.0031	60.0198	96.4662	95.2884	93.3054
Ao3042_00671	AO1008_05750	187.964	269.747	218.643	184.321	188.885	232.304
Ao3042_00672	AO1008_05751	6.69944	3.80247	4.6501	6.77079	7.43817	5.16255
Ao3042_00673	AO1008_05752	12.4115	6.41716	4.88684	9.6429	10.3267	10.7473
Ao3042_00674	AO1008_05753	1.98543	4.08247	8.08904	3.28306	3.89057	5.8994
Ao3042_00675	AO1008_05754	16.3461	14.3847	27.6195	3.8063	8.08302	22.1897
Ao3042_00676	AO1008_05755	21.7644	15.2131	16.6003	23.1668	27.1539	27.2569
Ao3042_00677	AO1008_05756	0.45177	45.3918	232.997	0.281462	0.95891	8.94821
Ao3042_00678	AO1008_05757	3.233	7.66202	7.32954	0.100503	1.36868	1.49128
Ao3042_00679	AO1008_05758	9.25914	10.6662	6.26014	0.754276	1.77228	1.96267
Ao3042_00680	AO1008_05759	33.7117	62.0971	66.2001	17.0157	23.4256	27.1298
Ao3042_00681	AO1008_05760	102.103	47.1503	44.4596	90.8365	58.8083	43.5325
Ao3042_00682	AO1008_05761	21.9356	31.4677	21.7273	17.9105	13.1136	11.7859
Ao3042_00683	AO1008_05762	16.9717	15.8063	22.5093	4.37471	8.13749	7.37408
Ao3042_00684	AO1008_05763	0.858881	2.26007	3.60465	0.266838	0.96885	2.92251
Ao3042_00685	AO1008_05764	0	0.610335	0.778577	0	0.130826	1.5274
Ao3042_00686	AO1008_05765	0	0	0	0	0	0
Ao3042_00687	AO1008_05766	114.882	113.876	130.615	88.2375	128.714	166.522
Ao3042_00688	AO1008_05767	45.5355	41.382	37.7425	18.7379	32.0331	28.6726
Ao3042_00689	AO1008_05768	168.151	113.327	148.515	34.9023	59.8358	59.2783
Ao3042_00690	AO1008_05769	86.0095	76.3442	63.3657	132.242	116.634	93.4418
Ao3042_00691	AO1008_05770	0	1.12173	0.474877	0	0.641831	0.249083
Ao3042_00692	AO1008_05771	4.5389	11.5792	8.02531	4.77077	6.25073	8.87283
Ao3042_00694	AO1008_05773	3.47715	6.39753	4.06042	2.01108	3.77536	6.6576
Ao3042_00695	AO1008_05774	0.36892	0.272982	1.2192	0	0.11702	0
Ao3042_00696	AO1008_05775	0.515805	1.33866	1.46258	0.481532	0.327993	0.637909
Ao3042_00697	AO1008_05776	54.017	46.3355	39.25	4.82448	14.8334	22.35
Ao3042_00698	AO1008_05777	3.98335	11.4426	3.99979	2.20748	9.49584	11.0819
Ao3042_00699	AO1008_05778	10.3989	173.849	179.242	23.0629	31.5203	555.009
Ao3042_00700	AO1008_05779	5.02151	3.30295	13.7833	4.13556	12.3241	13.1249
Ao3042_00702	AO1008_05781	777.854	1665.47	1588.39	408.049	626.195	831.231
Ao3042_00703	AO1008_05782	0.148015	0	0	0.0689069	0.468949	0.365198
Ao3042_00704	AO1008_05783	2.39258	1.78131	3.3987	6.72371	5.34908	2.96843
Ao3042_00705	AO1008_05784	0.407476	0	0.776219	4.24152	0.527639	0.816601
Ao3042_00706	AO1008_05785	0.809552	0.240571	0.306346	2.4223	2.68254	1.76474
Ao3042_00708	AO1008_05787	1.27742	1.35733	0	8.88185	0.698648	1.26692
Ao3042_00709	AO1008_05788	39.0287	12.6021	4.70988	56.6578	42.7716	16.8268
Ao3042_00710	AO1008_05789	18.1277	6.86793	7.16768	26.8301	20.4766	12.4996
Ao3042_00711	AO1008_05791	17.9992	24.1184	121.779	0.333532	2.72833	16.4342
Ao3042_00712	AO1008_05792	0	0	0	0	0	0
Ao3042_00713	AO1008_05793	0.0502607	0.0742023	0.379221	0	0.0635991	0.0495503
Ao3042_00714	AO1008_05794	1.70225	2.51702	1.75271	1.29698	2.45197	2.90225
Ao3042_00715	AO1008_05795	9.73135	11.0154	9.58607	5.75451	13.0921	19.2174
Ao3042_00716	AO1008_05796	4.7039	5.98268	2.75364	5.12464	8.87591	13.7489
Ao3042_00717	AO1008_05797	8.18477	5.34708	3.38462	9.4052	14.2369	28.8148
Ao3042_00718	AO1008_05798	5.78427	5.30073	3.05346	6.66189	8.68955	14.1122
Ao3042_00719	AO1008_05799	0	0.236975	0	0.149134	0.609784	0.316074
Ao3042_00720	AO1008_05800	0	0.134751	0	0	0	0
Ao3042_00721	AO1008_05801	0	0.332713	0	0	0	0
Ao3042_00722	AO1008_05802	43.1109	32.9573	24.1426	55.4801	54.9618	41.4264
Ao3042_00723	AO1008_05803	28.3917	27.1333	33.2855	48.3279	33.2796	30.8236
Ao3042_00724	AO1008_05804	26.9149	24.9922	26.2018	31.3534	31.6122	40.5589
Ao3042_00725	AO1008_05805	9.01488	8.7498	7.00033	5.88293	8.13776	13.1633
Ao3042_00726	AO1008_05806	16.14	11.9439	17.7215	5.6845	12.1453	19.4656
Ao3042_00727	AO1008_05807	7.08616	8.85761	15.4806	1.44583	4.36008	8.75641
Ao3042_00728	AO1008_05808	13.4213	7.67102	4.71952	39.5063	21.3743	11.8855
Ao3042_00729	AO1008_05809	11.4653	11.5779	13.6853	16.1096	10.4424	22.2688
Ao3042_00730	AO1008_05810	4.90591	8.96621	4.65533	5.38062	6.64704	4.07133
Ao3042_00731	AO1008_05811	2.58673	4.51547	3.77124	8.75161	9.82497	11.5382
Ao3042_00732	AO1008_05812	33.8777	49.496	50.8237	119.358	107.131	95.6009
Ao3042_00733	AO1008_05813	1.48659	2.93867	1.4049	1.96559	1.1025	2.57332
Ao3042_00734	AO1008_05814	0.901108	2.04101	1.36015	1.17382	1.59735	1.36277
Ao3042_00735	AO1008_05815	0	0	0.586748	0.0965378	0.13146	0.613911
Ao3042_00736	AO1008_05816	2.13789	6.73916	9.34685	2.24582	4.58952	14.8094
Ao3042_00737	AO1008_05817	0.141675	0	0.267909	0	0	2.10377
Ao3042_00738	AO1008_05818	13.4172	58.3865	48.2067	9.22839	12.2714	125.207
Ao3042_00739	AO1008_05819	15.1349	10.606	7.41979	35.866	24.7909	22.1953
Ao3042_00740	AO1008_05820	19.3998	16.6403	29.0557	35.8678	23.7305	25.5837
Ao3042_00741	AO1008_05821	20.187	10.395	21.3263	27.7582	20.5312	28.5435
Ao3042_00742	AO1008_05822	15.8936	18.798	21.6401	16.2625	21.8831	24.1717
Ao3042_00743	AO1008_05823	3.39708	6.65434	9.4012	2.37764	4.00975	9.71954
Ao3042_00744	AO1008_05824	4.43783	5.53611	3.11924	1.91263	3.82637	7.19582
Ao3042_00745	AO1008_05825	0	0	0	0	0	0
Ao3042_00746	AO1008_05826	154.038	125.234	96.5927	150.323	151.255	110.899
Ao3042_00747	AO1008_05827	126.113	105.516	108.576	201.137	202.402	206.91
Ao3042_00748	AO1008_05828	68.7271	51.6806	45.484	143.588	106.476	84.1945
Ao3042_00749	AO1008_01067	0.831428	0.247134	1.88797	0.311035	1.27191	2.80157
Ao3042_00750	AO1008_01068	4.10764	2.04891	3.16929	2.46968	2.04169	6.3821
Ao3042_00751	AO1008_01069	6.96635	2.36261	4.30241	2.14276	8.70181	2.01217
Ao3042_00752	AO1008_01070	68.5872	60.604	38.9327	39.7577	60.759	80.1961
Ao3042_00754	AO1008_01072	0.936324	0.4622	0	29.0049	15.8519	5.4492
Ao3042_00755	AO1008_01073	7.87193	8.45701	30.0236	0.126746	1.72683	2.82078
Ao3042_00756	AO1008_01074	33.8308	59.1676	58.969	50.6879	75.4062	67.6382
Ao3042_00757	AO1008_01075	16.834	20.4004	30.4194	25.0383	27.2426	40.981
Ao3042_00758	AO1008_01076	1.9105	1.19712	1.96608	4.30897	3.88457	5.42405
Ao3042_00759	AO1008_05829	0.474106	0	0	0	0	0
Ao3042_00760	AO1008_05830	275.906	556.2	307.545	331.115	392.274	328.142
Ao3042_00761	AO1008_05831	22.6588	17.5695	27.574	22.9246	29.6247	32.3916
Ao3042_00762	AO1008_05832	20.4246	21.8697	27.6039	70.076	44.0855	50.6182
Ao3042_00763	AO1008_05833	14.5518	12.822	12.1473	16.6724	19.0573	20.4339
Ao3042_00764	AO1008_05834	25.3905	16.8128	19.9008	35.5792	32.5634	19.1982
Ao3042_00765	AO1008_05835	26.4763	25.1173	20.5952	16.8826	20.641	27.4496
Ao3042_00766	AO1008_05836	6.32184	3.88342	4.92036	9.32883	10.2507	10.3198
Ao3042_00767	AO1008_05837	211.363	170.396	170.722	538.836	388.841	403.406
Ao3042_00768	AO1008_05838	59.47	67.6072	74.5759	111.813	83.0522	70.7883
Ao3042_00769	AO1008_05839	35.1546	27.9829	30.3485	42.1888	38.7141	31.8084
Ao3042_00770	AO1008_05840	146.523	166.627	191.565	51.9228	131.029	154.485
Ao3042_00771	AO1008_05841	15.7742	13.385	18.0461	3.68825	9.52766	10.13
Ao3042_00772	AO1008_05842	77.5692	88.1976	75.9219	63.0081	68.6149	57.8289
Ao3042_00773	AO1008_05843	0.156234	0.23206	0.591118	0	0.398084	0.464298
Ao3042_00774	AO1008_05844	0.274286	0	0.520578	0	0	0
Ao3042_00775	AO1008_05845	1.89498	0.76835	1.6302	0.644647	3.29549	1.70776
Ao3042_00776	AO1008_05846	9.74524	8.01128	8.17882	18.8341	16.7129	15.1503
Ao3042_00777	AO1008_05847	76.7346	47.6108	53.8009	114.559	117.989	112.386
Ao3042_00778	AO1008_05848	64.8663	64.133	77.6168	40.8503	66.0637	109.356
Ao3042_00779	AO1008_05849	27.3352	40.1445	37.9202	32.4316	28.4514	56.2011
Ao3042_00780	AO1008_05850	0.079911	0.472707	14.0297	0.14885	0.20262	1.89329
Ao3042_00781	AO1008_05851	30.3111	41.7777	42.3814	30.9382	35.403	55.4397
Ao3042_00782	AO1008_05852	2.52408	4.74238	2.38362	1.26686	0.985694	6.52193
Ao3042_00783	AO1008_05853	0.621145	4.0097	1.96118	1.35817	0.529287	5.96173
Ao3042_00784	AO1008_05854	0	0.125921	0	0	0	0.420256
Ao3042_00785	AO1008_05855	1.78353	4.43913	10.092	9.16093	7.51703	15.9423
Ao3042_00786	AO1008_05856	62.1064	41.2759	43.5574	64.5656	56.5348	57.6129
Ao3042_00787	AO1008_05857	10.3042	6.78319	6.81457	16.9482	15.0615	15.218
Ao3042_00788	AO1008_05858	0	0	0	0	0	0
Ao3042_00789	AO1008_05859	1.12652	1.69462	1.42937	1.06436	1.45569	1.50286
Ao3042_00790	AO1008_05860	211.787	179.009	123.827	317.751	232.891	133.305
Ao3042_00791	AO1008_05861	5.73028	10.316	13.1398	4.5289	5.38121	6.071
Ao3042_00792	AO1008_05862	10.4664	4.15423	9.1858	11.1672	14.0815	11.7111
Ao3042_00793	AO1008_05863	26.9024	37.4657	38.9549	108.936	50.2678	35.0945
Ao3042_00794	AO1008_05864	91.4685	293.511	340.294	74.2381	131.759	282.29
Ao3042_00796	AO1008_05866	16.8474	26.9784	25.5319	29.4836	25.7888	25.0876
Ao3042_00797	AO1008_05867	20.696	20.039	23.6399	34.5809	20.3344	20.4564
Ao3042_00798	AO1008_05868	49.3679	23.8218	23.0028	58.6686	58.8647	40.2194
Ao3042_00799	AO1008_05869	22.688	15.7077	25.3313	38.9288	28.2172	28.074
Ao3042_00800	AO1008_05870	4.67944	6.00998	18.3292	3.52856	7.90454	4.97239
Ao3042_00801	AO1008_05871	3.80486	2.68092	3.82135	5.34548	6.08912	6.17205
Ao3042_00802	AO1008_05872	20.212	14.8452	12.4233	17.0733	20.8588	10.9172
Ao3042_00803	AO1008_05873	22.013	15.3692	14.0233	20.8516	15.9965	13.7018
Ao3042_00804	AO1008_05874	18.2968	28.3557	64.2719	2.9772	8.50606	7.61957
Ao3042_00806	AO1008_05876	25.1758	20.7888	18.5423	27.1396	18.8878	18.2853
Ao3042_00808	AO1008_05878	7.46358	3.44237	7.17602	1.43631	1.97646	1.51932
Ao3042_00809	AO1008_05879	209.758	149.437	132.348	259.698	253.71	129.811
Ao3042_00810	AO1008_05880	233.065	138.453	97.052	466.889	295.255	221.327
Ao3042_00811	AO1008_05881	10.6529	13.4493	11.5552	25.6143	26.4259	32.5617
Ao3042_00812	AO1008_05882	174.551	351.772	289.704	12.9706	89.256	160.953
Ao3042_00813	AO1008_05883	50.7965	39.936	73.58	36.0123	48.0462	47.4876
Ao3042_00814	AO1008_05884	12.1388	13.6963	14.37	10.7661	15.5634	15.1685
Ao3042_00815	AO1008_05885	21.0117	27.6398	25.7064	26.4247	22.3117	18.2756
Ao3042_00816	AO1008_05886	1.94781	10.3708	17.8129	8.65128	7.03368	7.23764
Ao3042_00817	AO1008_05887	3.80946	5.64108	7.58506	0.86397	4.8367	7.63089
Ao3042_00818	AO1008_05888	15.7534	27.0304	43.1852	15.6629	29.6222	24.612
Ao3042_00819	AO1008_05889	23.9279	47.3962	33.0857	25.7008	38.2683	27.5849
Ao3042_00820	AO1008_05890	15.3166	19.2223	19.3035	26.2781	25.3094	23.5748
Ao3042_00821	AO1008_05891	13.1369	7.49771	7.92186	17.8482	13.594	13.4318
Ao3042_00822	AO1008_05892	26.8121	27.3322	34.8356	17.7154	35.5371	27.4036
Ao3042_00823	AO1008_05893	22.822	33.7401	27.7985	11.7435	33.5951	10.9038
Ao3042_00824	AO1008_05894	2.84962	5.22138	2.40655	1.49146	4.89096	6.95086
Ao3042_00825	AO1008_05895	1.00121	0	0	0	0	0
Ao3042_00826	AO1008_05896	33.8444	52.2759	68.7631	18.8866	31.4431	30.7285
Ao3042_00827	AO1008_05897	15.5994	18.1717	24.7091	18.292	22.447	20.9888
Ao3042_00829	AO1008_05899	7.32194	4.55357	3.45592	7.8279	8.96806	6.0791
Ao3042_00830	AO1008_05900	88.6605	121.73	210.651	52.892	129.261	156.837
Ao3042_00831	AO1008_05901	9.83016	15.3708	13.8261	11.3075	8.1852	17.4907
Ao3042_00832	AO1008_05902	107.918	147.434	139.881	154.988	132.75	113.306
Ao3042_00833	AO1008_05903	34.2687	41.0501	36.572	17.2192	28.227	29.6985
Ao3042_00835	AO1008_05905	34.2065	48.0725	33.9592	9.26288	20.572	31.2816
Ao3042_00836	AO1008_05906	7.72285	21.8204	18.6665	76.7192	56.2898	18.2767
Ao3042_00837	AO1008_05907	27.2541	28.7077	26.5389	30.6926	32.6048	26.885
Ao3042_00838	AO1008_05908	173.644	171.029	173.119	94.8763	138.862	133.458
Ao3042_00840	AO1008_05910	2.97925	1.39748	3.85631	0.293162	1.39842	2.796
Ao3042_00841	AO1008_05911	117.888	129.289	190.813	112.005	112.41	270.69
Ao3042_00842	AO1008_05912	42.537	45.1593	41.9926	24.9907	32.5463	42.5787
Ao3042_00843	AO1008_05913	143.396	103.826	79.7891	150.807	152.148	97.0223
Ao3042_00844	AO1008_05914	30.0568	26.2992	25.0576	49.177	44.1486	40.7032
Ao3042_00845	AO1008_05915	1.50492	1.61752	1.54914	3.24736	3.37971	3.37469
Ao3042_00846	AO1008_05916	0.145996	0.65018	0.552228	0	0	0.433673
Ao3042_00848	AO1008_05918	17.4949	21.216	25.782	44.0151	26.1628	46.3516
Ao3042_00849	AO1008_05919	97.4064	81.5101	140.096	72.1703	115.56	73.54
Ao3042_00850	AO1008_05920	13.6622	10.8237	20.1701	16.0524	16.6062	15.8734
Ao3042_00851	AO1008_05921	71.4045	63.8532	55.7641	163.64	87.6276	55.9067
Ao3042_00852	AO1008_05922	22.7686	21.8966	20.5859	32.5174	25.0614	24.4982
Ao3042_00854	AO1008_05924	9.36088	9.74487	16.2256	7.74389	9.92874	10.386
Ao3042_00855	AO1008_05925	89.6531	71.4741	66.6616	179.545	105.109	83.8614
Ao3042_00856	AO1008_05926	47.0913	45.5494	39.6717	66.9842	62.6399	45.8757
Ao3042_00857	AO1008_05927	0	0.298282	0	0	0	0.397648
Ao3042_00858	AO1008_05928	47.0197	72.3361	86.2557	63.5395	68.9235	95.5226
Ao3042_00859	AO1008_05929	637.641	1007.79	792.49	468.518	656.255	818.813
Ao3042_00860	AO1008_10507	450.794	803.116	586.826	1121.49	782.232	1028.93
Ao3042_00861	AO1008_10508	57.2362	33.8708	41.591	142.279	79.6342	60.3739
Ao3042_00862	AO1008_10509	22.0449	30.3935	34.5016	27.9569	29.6101	31.9015
Ao3042_00863	AO1008_10510	23.2797	19.7516	14.5901	25.4172	23.5541	21.3756
Ao3042_00864	AO1008_10511	1.2665	0.474671	1.20327	1.49146	1.22274	1.57974
Ao3042_00865	AO1008_10512	0.577727	0.948451	1.09017	0.716875	1.78859	1.01319
Ao3042_00866	AO1008_10513	31.5194	53.1412	41.1257	31.8514	51.6337	59.491
Ao3042_00867	AO1008_10514	0.987057	1.59331	3.04998	1.4214	3.18732	2.83591
Ao3042_00868	AO1008_10515	2.92405	3.57606	4.03518	2.24832	5.1159	8.73315
Ao3042_00869	AO1008_01010	57.8829	84.0801	73.7804	39.4445	57.8139	76.6039
Ao3042_00870	AO1008_01011	76.5521	124.726	108.234	84.217	123.763	189.64
Ao3042_00871	AO1008_01012	9.47793	7.8049	7.18154	9.12594	5.88654	6.21318
Ao3042_00872	AO1008_01013	51.6293	38.3129	38.3392	58.0383	46.2817	53.8867
Ao3042_00874	AO1008_10100	16.4895	16.9893	16.5406	17.1159	19.9927	15.5327
Ao3042_00875	AO1008_10099	21.3886	11.9491	22.1982	30.045	25.2786	44.6138
Ao3042_00876	AO1008_10098	3.57012	3.81029	3.48977	3.71765	3.26507	4.25333
Ao3042_00877	AO1008_10097	8.76621	12.5588	7.57695	13.2043	8.81572	7.98859
Ao3042_00878	AO1008_10096	30.1059	37.1079	31.013	17.2881	26.3723	28.754
Ao3042_00879	AO1008_10095	459.317	402.309	397.51	182.297	294.073	307.974
Ao3042_00880	AO1008_10094	26.5394	29.9129	33.2414	27.0384	27.9206	34.1244
Ao3042_00881	AO1008_10093	15.1781	12.1447	15.786	23.3101	13.3238	20.8398
Ao3042_00882	AO1008_10092	166.922	147.832	158.432	177.657	139.75	115.263
Ao3042_00884	AO1008_10090	0.138043	0.819305	1.30507	0	0	1.09306
Ao3042_00885	AO1008_10089	13.3826	13.1898	26.6633	16.0602	14.2278	13.3546
Ao3042_00886	AO1008_10088	15.9154	12.6651	15.2186	31.1572	19.8238	15.5288
Ao3042_00887	AO1008_10087	1777.23	975.084	523.133	2465.69	3242.64	2543.3
Ao3042_00888	AO1008_10086	5.76488	6.9431	4.50897	4.60263	7.83189	8.37485
Ao3042_00889	AO1008_10085	4.86534	16.3495	12.2803	3.03557	6.66786	5.71837
Ao3042_00890	AO1008_10084	2.96954	3.34946	0.706391	5.25953	4.79522	3.71326
Ao3042_00891	AO1008_10083	30.608	31.4968	29.188	48.8556	28.5013	31.1489
Ao3042_00892	AO1008_10082	15.8136	11.9417	7.1095	11.7973	19.1325	10.0591
Ao3042_00893	AO1008_10081	0.723676	0.54388	0	0	0	0.361813
Ao3042_00894	AO1008_10080	29.5223	41.8639	34.2406	110.757	54.0027	55.8861
Ao3042_00895	AO1008_10079	17.4105	12.9539	15.285	45.0828	33.1989	33.1884
Ao3042_00896	AO1008_10078	0.0694718	5.23654	0.655559	0.258679	0.704131	2.87907
Ao3042_00897	AO1008_10077	0.263167	0.778719	0.662554	0	0.111268	0.693032
Ao3042_00898	AO1008_10076	8.28081	6.00265	4.48946	12.1741	10.5407	10.2166
Ao3042_00900	AO1008_10074	19.2923	11.0236	12.9166	26.6457	19.6619	17.0174
Ao3042_00901	AO1008_10073	12.3276	9.49473	11.1206	12.7781	12.3301	8.64606
Ao3042_00902	AO1008_10072	1320.15	1099.49	1208.44	982.053	960.165	1100.63
Ao3042_00903	AO1008_10071	165.339	86.1982	111.449	153.573	136.809	111.208
Ao3042_00904	AO1008_10070	31.79	23.2714	27.1697	35.7191	22.2556	18.1888
Ao3042_00905	AO1008_10069	296.117	182.339	185.613	272.373	287.649	216.987
Ao3042_00906	AO1008_10068	0.729506	0	0	0	0	2.22578
Ao3042_00907	AO1008_10067	45.2759	72.4622	194.176	18.7765	42.6268	42.9608
Ao3042_00908	AO1008_10066	9.9709	29.3997	8.84295	15.908	16.275	17.0657
Ao3042_00909	AO1008_10065	2.07381	1.23576	1.17861	6.6075	1.85552	2.47092
Ao3042_00910	AO1008_10064	0.463122	0.686298	0	1.09992	0.441366	0.457931
Ao3042_00911	AO1008_10063	7.10413	5.713	7.27803	18.5317	14.1342	14.5092
Ao3042_00912	AO1008_10062	6.70409	8.42617	14.395	9.24276	10.1371	10.4315
Ao3042_00913	AO1008_10061	22.5087	25.5011	49.3604	12.1158	21.4854	42.7133
Ao3042_00914	AO1008_10060	22.0361	16.1585	22.2899	25.7448	18.5207	24.8653
Ao3042_00915	AO1008_10059	8.89313	6.52413	11.2612	19.4923	11.5623	5.29802
Ao3042_00916	AO1008_10058	262.741	205.219	221.276	300.023	207.059	170.862
Ao3042_00917	AO1008_10057	726.09	447.624	272.778	1651.92	1409.38	783.249
Ao3042_00918	AO1008_10056	145.347	216.144	221.149	260.994	189.598	220.105
Ao3042_00919	AO1008_10055	672.712	735.66	821.633	856.163	734.717	810.911
Ao3042_00920	AO1008_10054	57.1703	36.7373	29.6822	90.4951	43.6345	29.8779
Ao3042_00921	AO1008_10053	1.63684	1.42524	4.36436	0.897451	0.85537	2.37803
Ao3042_00922	AO1008_10052	27.1282	20.9816	25.1369	22.6879	36.0881	23.302
Ao3042_00923	AO1008_10051	14.7449	13.3642	17.6588	23.8468	21.205	17.7415
Ao3042_00924	AO1008_10050	10.1926	7.99353	5.31701	12.4457	9.14772	19.5976
Ao3042_00925	AO1008_10049	56.1553	86.2384	80.1094	13.141	31.0354	35.6698
Ao3042_00926	AO1008_10048	9.3458	19.351	23.0136	0.908322	4.94587	4.49296
Ao3042_00927	AO1008_10047	73.5929	77.1118	183.745	9.42631	19.124	43.9585
Ao3042_00928	AO1008_10046	1.895	1.06547	1.44661	0.209755	0.513668	0.978362
Ao3042_00929	AO1008_10045	61.0969	123.212	137.087	29.0933	92.3996	143.45
Ao3042_00930	AO1008_10044	231.448	358.22	350.594	18.4219	67.0521	149.508
Ao3042_00931	AO1008_10043	172.439	207.66	255.868	224.664	222.179	208.788
Ao3042_00932	AO1008_10042	46.6761	40.9295	63.7296	48.6475	51.239	54.8067
Ao3042_00934	AO1008_10040	31.4404	26.68	33.7906	36.4259	28.6412	40.6273
Ao3042_00935	AO1008_10039	0	0.324207	0	0	0	0.21606
Ao3042_00937	AO1008_10037	0	0.206693	0.791789	0	0	0.206987
Ao3042_00938	AO1008_10036	20.5821	33.9939	48.2521	9.16482	20.8332	32.9757
Ao3042_00939	AO1008_10035	1.52449	0.283608	11.9077	0.713723	0	0.756261
Ao3042_00940	AO1008_10034	41.0563	55.8119	60.4892	40.5269	46.2468	47.144
Ao3042_00941	AO1008_10033	2.41827	2.26506	2.28265	1.72678	2.86157	9.86774
Ao3042_00942	AO1008_10032	11.647	13.5247	13.5033	8.73784	10.7442	10.3816
Ao3042_00943	AO1008_10031	15.7667	13.931	10.7562	11.208	14.5308	14.8138
Ao3042_00944	AO1008_10030	63.7285	14.1982	37.6883	13.3163	20.0798	33.4989
Ao3042_00945	#N/A	0	0	0	0	0	0
Ao3042_00946	AO1008_10028	62.8911	61.3391	30.2462	19.5656	23.3064	29.2516
Ao3042_00947	AO1008_10027	3.05392	4.05499	9.54909	1.76757	3.34311	4.37127
Ao3042_00948	AO1008_10026	194.201	130.955	159.994	280.618	227.631	226.361
Ao3042_00949	AO1008_10025	33.8756	37.8088	47.965	73.7296	39.0974	37.1907
Ao3042_00950	AO1008_10024	17.1881	34.4169	33.1509	9.90571	18.1538	11.874
Ao3042_00951	AO1008_10023	50.0341	12.4466	2.68797	16.1994	3.61851	6.75441
Ao3042_00953	AO1008_10021	254.429	213.944	251.842	294.653	227.67	191.657
Ao3042_00954	AO1008_10020	267.289	183.832	182.96	349.541	260.68	228.807
Ao3042_00955	AO1008_10019	56.3635	68.5565	105.999	74.918	64.9036	153.05
Ao3042_00956	AO1008_10018	0	0	0	0	0.502095	0
Ao3042_00957	AO1008_10017	76.8994	55.354	92.2395	52.714	61.7142	73.5685
Ao3042_00958	AO1008_10016	27.6521	25.212	20.4526	23.3758	29.6398	30.6168
Ao3042_00959	AO1008_10015	22.8347	17.8918	19.5789	43.5888	36.827	44.7895
Ao3042_00960	AO1008_10014	29.4648	34.7262	43.3623	57.6967	49.8858	45.2642
Ao3042_00961	AO1008_10013	273.262	195.792	170.374	587.932	393.02	252.046
Ao3042_00962	AO1008_10012	4.30415	1.10098	2.75666	3.4463	4.74005	3.6458
Ao3042_00963	AO1008_10011	173.039	267.917	306.106	131.119	217.277	343.019
Ao3042_00965	AO1008_10009	166.251	185.254	189.152	301.124	212.235	162.099
Ao3042_00966	AO1008_10008	724.226	504.973	477.159	1008.42	747.951	361.477
Ao3042_00967	AO1008_10007	34.2767	33.6021	39.5769	28.7695	29.3055	31.0739
Ao3042_00968	AO1008_10006	61.6731	61.1738	72.6633	99.3618	88.9743	107.873
Ao3042_00970	AO1008_10433	1.6734	1.5945	0.451786	2.89993	3.64611	1.89134
Ao3042_00971	AO1008_00757	64.2798	52.822	45.9135	60.9075	66.0584	51.8612
Ao3042_00972	AO1008_00758	20.5285	17.0931	16.5675	3.51683	9.57122	12.4456
Ao3042_00973	AO1008_00759	13.1941	11.2918	11.3909	18.5687	15.0294	17.4308
Ao3042_00974	AO1008_00760	0	0	0	0	0	0
Ao3042_00975	AO1008_00761	56.4851	52.9303	47.1257	78.5498	64.3174	54.723
Ao3042_00976	AO1008_00762	45.0452	69.5522	58.2895	124.175	96.2729	78.1247
Ao3042_00977	AO1008_00763	111.943	64.6974	56.5987	474.113	150.904	70.7872
Ao3042_00978	AO1008_10516	157.83	158.534	180.465	190.299	203.875	140.133
Ao3042_00979	AO1008_10517	176.295	318.264	326.673	206.683	225.656	193.479
Ao3042_00980	AO1008_10518	4.30415	2.20197	4.13499	12.4067	7.58407	2.18748
Ao3042_00981	AO1008_10519	21.7492	14.866	14.8824	46.651	25.8637	24.7901
Ao3042_00982	AO1008_10520	9.79261	8.4838	11.4086	18.6651	17.7456	10.0432
Ao3042_00983	AO1008_10521	30.0331	38.553	36.2784	24.9577	49.8491	46.1607
Ao3042_00984	AO1008_10522	5.83854	11.669	29.75	5.2131	9.3611	19.2115
Ao3042_00985	AO1008_10523	4.23522	3.19361	2.8221	3.0168	4.9492	3.77159
Ao3042_00986	AO1008_10524	0	0	0	0.815787	0	0
Ao3042_00987	AO1008_10525	3.65668	3.10686	7.25059	3.74701	7.5512	2.93474
Ao3042_00988	AO1008_10526	13.282	8.66723	13.8672	33.0821	15.9336	14.5704
Ao3042_00989	AO1008_10527	12.6017	11.5525	13.3202	13.9357	15.6326	17.7433
Ao3042_00990	AO1008_10528	24.3113	13.3082	17.8245	33.6049	35.5839	28.0553
Ao3042_00991	AO1008_10529	64.2145	54.1732	69.2964	97.2077	83.6555	56.4618
Ao3042_00992	AO1008_10530	46.818	60.6241	55.4772	27.8195	42.302	38.7534
Ao3042_00994	AO1008_10532	29.6994	48.2988	37.9929	101.026	49.6653	57.0751
Ao3042_00995	AO1008_10533	277.132	181.708	676.516	18.7453	28.0762	113.682
Ao3042_00996	AO1008_10534	12.8671	15.4771	19.4316	13.8375	18.3046	14.6235
Ao3042_00997	AO1008_10535	12.9544	13.0594	17.0698	18.1377	23.1481	20.0997
Ao3042_00998	AO1008_10536	73.4552	70.1837	76.5825	47.8309	67.5504	81.5865
Ao3042_00999	AO1008_10537	0	0.699972	0	0	0	0.465067
Ao3042_01000	AO1008_10538	0	0	0	0	0	0
Ao3042_01001	AO1008_10539	0.597883	0	0	0	0	0
Ao3042_01002	AO1008_10540	9.04266	6.61682	4.73424	16.9689	6.36543	2.80002
Ao3042_01003	AO1008_10541	0.0660624	0	0	0.122972	0	0
Ao3042_01004	AO1008_10542	0	0	0.420709	0.208173	0	0
Ao3042_01005	AO1008_10543	165.629	139.306	100.465	69.5892	71.3056	111.578
Ao3042_01006	AO1008_10544	346.183	153.922	34.5049	805.562	494.709	153.302
Ao3042_01007	AO1008_10545	172.149	204.289	145.563	86.8775	126.795	116.195
Ao3042_01008	AO1008_10546	17.8968	15.54	15.7727	17.8071	18.3612	14.3926
Ao3042_01009	AO1008_10547	26.7093	19.4435	15.9338	20.5252	27.099	22.6743
Ao3042_01010	AO1008_10548	40.9075	46.7388	56.4776	28.0887	40.7182	40.9987
Ao3042_01011	AO1008_10549	4.29199	1.84083	1.92074	0.842886	0.717477	0.67
Ao3042_01012	AO1008_10550	1.72541	0.993205	1.62933	0.71475	0.729891	1.04166
Ao3042_01013	AO1008_10551	1.39931	3.99001	5.33465	0	0.5393	2.04828
Ao3042_01014	AO1008_10552	71.5757	89.7006	112.727	18.0793	33.8808	61.1772
Ao3042_01015	AO1008_10553	5.1414	57.6835	50.9823	6.55719	7.12485	11.585
Ao3042_01016	AO1008_03459	15.1523	8.86379	4.91739	12.8018	13.2001	20.0265
Ao3042_01017	AO1008_03460	2.68848	4.22867	6.28302	2.2177	5.44056	5.95359
Ao3042_01018	AO1008_03461	16.2885	19.1109	20.7691	14.7076	17.997	19.8713
Ao3042_01019	AO1008_03462	33.4614	32.5976	36.0599	44.8411	45.4602	48.4613
Ao3042_01020	AO1008_03463	22.927	8.77082	7.04452	34.9995	29.2279	24.2141
Ao3042_01021	AO1008_03464	3.63011	3.79607	2.50261	2.43892	2.75479	1.77616
Ao3042_01022	AO1008_03465	186.491	163.507	227.089	20.7973	42.4566	63.8776
Ao3042_01023	AO1008_03466	186.264	172.933	166.96	28.5344	59.0867	69.7683
Ao3042_01026	AO1008_03469	5.83032	3.38768	6.84251	9.78085	11.0637	4.05217
Ao3042_01027	AO1008_03470	27.616	21.6222	35.211	40.4206	47.4913	39.2884
Ao3042_01028	AO1008_03471	7.43297	4.89787	6.58015	11.7556	9.91638	7.7249
Ao3042_01029	AO1008_03472	8.03713	4.19844	18.4371	2.32185	2.5456	4.03353
Ao3042_01030	AO1008_03473	8.8855	7.13545	6.99757	5.87412	9.57048	10.3758
Ao3042_01031	AO1008_03474	2.73413	2.99876	5.5471	2.36023	2.18546	3.30209
Ao3042_01032	AO1008_03475	26.3706	28.1703	30.676	28.2366	31.3401	23.909
Ao3042_01033	AO1008_03476	174.715	161.726	159.452	431.022	148.468	238.345
Ao3042_01034	AO1008_03477	66.374	87.3385	77.9105	148.697	92.1547	84.5201
Ao3042_01035	AO1008_03478	146.331	151.357	154.894	232.418	169.343	139.08
Ao3042_01036	AO1008_03479	32.302	13.7505	15.4619	33.7304	44.3951	72.8422
Ao3042_01037	AO1008_03480	13.9697	21.2242	27.3278	13.5823	17.6124	14.567
Ao3042_01038	AO1008_03481	18.1137	16.625	22.4026	17.7412	19.9924	24.6623
Ao3042_01039	AO1008_03482	71.1169	54.8394	44.624	55.1935	47.5098	49.8559
Ao3042_01040	AO1008_03483	11.4306	5.8706	6.79425	5.15589	5.5381	9.47837
Ao3042_01041	AO1008_03484	35.5604	28.4905	30.2985	46.7434	35.5433	46.9903
Ao3042_01042	AO1008_03485	0	0	0.851587	0.947715	0	4.18486
Ao3042_01043	AO1008_03486	13.1278	10.9192	7.20676	3.05207	6.94163	13.6175
Ao3042_01044	AO1008_03487	14.7439	12.1705	10.2589	10.0131	12.3478	24.3796
Ao3042_01046	AO1008_03489	57.0988	38.0546	28.1655	76.2193	79.0881	57.5826
Ao3042_01047	AO1008_03490	4.56385	6.33293	8.61926	4.51949	3.61974	2.53601
Ao3042_01048	AO1008_03491	36.3082	28.986	28.322	28.707	38.4286	35.7489
Ao3042_01049	AO1008_03492	144.323	127.459	148.277	502.441	172.658	212.217
Ao3042_01050	AO1008_03493	111.922	89.3397	97.8503	80.6507	104.572	82.2967
Ao3042_01051	AO1008_03494	41.5055	44.3014	54.2969	35.0545	52.1065	65.0112
Ao3042_01052	AO1008_03495	61.1438	36.8135	63.0771	39.2493	51.128	68.6172
Ao3042_01054	AO1008_03497	22.5251	16.0835	18.1033	26.8208	23.2593	21.1936
Ao3042_01055	AO1008_03498	22.8445	35.2611	37.9294	27.02	24.568	37.4541
Ao3042_01056	AO1008_03499	1935.82	1548.03	1068.49	4004.21	3255.21	2334.75
Ao3042_01057	AO1008_03500	319.103	815.446	1096.78	55.5816	150.018	144.317
Ao3042_01058	AO1008_03501	81.8165	55.3082	94.2033	52.311	95.7387	70.7006
Ao3042_01059	AO1008_03502	1.62683	1.03093	1.31611	2.30851	2.35673	3.05867
Ao3042_01060	AO1008_03503	22.18	49.8934	87.0549	35.0285	42.3121	44.5058
Ao3042_01061	AO1008_03504	167.715	163.178	166.396	446.303	141.798	230.949
Ao3042_01062	AO1008_03505	54.8136	38.5869	81.4833	76.5683	119.835	106.087
Ao3042_01063	AO1008_03506	9.65861	9.86557	10.2131	25.4491	16.7263	8.36734
Ao3042_01064	AO1008_03507	16.5276	16.7918	11.9773	31.5686	29.3202	23.2414
Ao3042_01065	AO1008_03508	1395.68	690.371	352.691	5771.83	3753.64	2958.59
Ao3042_01066	AO1008_03509	319.797	104.264	49.4341	280.272	243.272	132.296
Ao3042_01067	AO1008_03510	69.086	37.3144	183.457	0.679414	7.89634	9.71366
Ao3042_01068	AO1008_03511	4.69885	5.06348	4.32331	11.5696	6.6295	3.03777
Ao3042_01069	AO1008_03512	14.183	17.9198	25.1148	21.7429	24.0278	22.965
Ao3042_01070	AO1008_03513	37.1382	31.3472	26.0055	46.98	39.2175	31.2717
Ao3042_01071	AO1008_03514	4.27331	1.83277	1.69988	10.5949	5.00033	3.33535
Ao3042_01072	AO1008_03515	4.53017	6.26818	7.25124	4.67825	5.75526	6.03123
Ao3042_01073	AO1008_03516	295.952	183.146	231.284	631.622	464.075	446.023
Ao3042_01074	AO1008_03517	34.5762	28.1491	25.8166	28.0624	33.9936	39.5011
Ao3042_01075	AO1008_03518	19.6875	21.7715	24.6002	19.6314	17.5527	19.988
Ao3042_01076	AO1008_03519	2.33678	2.04863	4.41219	4.67662	5.92757	6.83712
Ao3042_01077	AO1008_03520	24.5241	30.1618	39.1101	16.2759	22.8586	28.4884
Ao3042_01078	AO1008_03521	24.0737	33.6129	33.6515	6.31218	36.6639	26.7093
Ao3042_01079	AO1008_03522	13.8779	17.0701	22.4899	22.7214	17.1338	17.7842
Ao3042_01080	AO1008_03523	35.8994	35.9449	39.3593	53.0508	59.176	39.8261
Ao3042_01081	AO1008_03524	13.3185	10.8074	10.4518	17.5401	15.5671	14.0828
Ao3042_01082	AO1008_03525	11.3487	13.09	12.6554	6.07821	7.93504	10.6786
Ao3042_01083	AO1008_03526	25.7631	23.1796	29.4903	21.4246	32.1619	37.3905
Ao3042_01084	AO1008_03527	13.4969	12.1604	13.482	14.5981	18.9283	18.7743
Ao3042_01085	AO1008_03528	259.742	399.862	428.794	108.395	188.379	241.197
Ao3042_01086	AO1008_03529	0	0	0	0	0	0
Ao3042_01087	AO1008_03530	0.293813	0.173593	0.110868	0.710744	0.818374	1.21704
Ao3042_01088	AO1008_03531	0	0	0.471931	0.116522	1.11108	1.60539
Ao3042_01089	AO1008_03532	35.2249	25.386	30.1306	120.176	61.7816	51.8105
Ao3042_01090	AO1008_03533	7.33454	14.1356	16.6348	1.48308	4.35112	8.1008
Ao3042_01091	AO1008_03534	109.837	87.0413	109.065	70.0084	77.3045	104.243
Ao3042_01092	AO1008_03535	85.2649	60.4323	70.2956	79.3783	106.501	129.413
Ao3042_01093	AO1008_03536	8.46783	11.8012	16.2937	10.3897	11.1493	13.826
Ao3042_01094	AO1008_03537	5.34078	7.01285	7.61488	8.18317	10.324	5.66691
Ao3042_01095	AO1008_03538	20.8277	30.4474	36.7505	30.5542	28.8207	21.8761
Ao3042_01096	AO1008_03539	12.9448	7.17761	2.18172	90.9102	108.411	100.849
Ao3042_01097	AO1008_03540	11.339	14.4254	21.3814	14.6916	23.9123	19.2566
Ao3042_01098	AO1008_03541	11.6724	479.478	75.1513	7.84742	29.8819	19.9921
Ao3042_01099	AO1008_03542	20.0565	7.66038	9.34108	25.3698	21.7251	26.7264
Ao3042_01100	AO1008_03543	119.662	36.6321	79.6103	144.284	196.253	116.487
Ao3042_01101	AO1008_03544	1215.82	1262.53	775.147	763.027	693.78	1119.1
Ao3042_01102	AO1008_03545	10.9153	15.468	18.928	11.641	15.0724	17.8846
Ao3042_01103	AO1008_03546	47.1099	57.7856	52.5282	50.7529	49.9165	44.2797
Ao3042_01104	AO1008_03547	40.1349	43.8941	19.7763	276.348	160.445	115.785
Ao3042_01105	AO1008_03548	14.0276	20.1916	11.1527	42.2477	35.9332	28.9367
Ao3042_01106	AO1008_03549	4.82333	7.16014	14.6507	0.81938	2.04698	4.19694
Ao3042_01107	AO1008_03550	1.07658	0.804765	1.02149	2.27678	2.76317	5.09178
Ao3042_01108	AO1008_03551	34.4175	77.3327	163.697	80.6817	129.143	298.204
Ao3042_01109	AO1008_03552	0.0996247	0.589987	0	0.557241	1.13816	0.393744
Ao3042_01110	AO1008_03553	0.239945	1.06698	0.453469	0	0	0.593251
Ao3042_01111	AO1008_03554	31.9303	53.9802	60.2452	37.9033	40.9599	47.6231
Ao3042_01112	AO1008_03555	11.7549	0	0	0	35.8763	0
Ao3042_01113	AO1008_03556	227.128	236.206	225.758	186.746	241.867	154.622
Ao3042_01114	AO1008_03557	101.776	80.9813	71.1069	77.8221	111.568	102.503
Ao3042_01115	AO1008_03558	25.4541	16.6373	20.2772	37.2615	32.1726	19.7893
Ao3042_01116	AO1008_03559	1.4681	0.73059	1.85606	0.229711	2.50807	1.2168
Ao3042_01117	AO1008_03560	32.3623	20.2907	26.4613	20.0006	23.432	29.251
Ao3042_01118	AO1008_03561	33.188	52.7693	53.8512	25.9286	34.8778	39.2381
Ao3042_01119	AO1008_03562	34.3848	43.1149	37.9333	36.5937	46.951	81.5052
Ao3042_01120	AO1008_03563	35.0008	25.6568	40.3097	33.981	37.8327	34.5391
Ao3042_01121	AO1008_03564	58.9211	45.0983	38.6114	90.1224	65.474	55.1385
Ao3042_01122	AO1008_03565	0.406195	1.22426	0	1.15307	1.05187	3.66294
Ao3042_01123	AO1008_03566	6.80099	9.06837	12.3778	5.48805	7.46822	10.5664
Ao3042_01124	AO1008_03567	61.5729	21.051	34.8297	37.0937	78.4192	47.0299
Ao3042_01125	AO1008_03568	250.159	219.707	236.058	646.339	224.612	314.757
Ao3042_01126	AO1008_03569	67.9775	64.9135	47.6775	48.8495	62.8982	42.2751
Ao3042_01127	AO1008_03570	51.364	84.0545	77.4981	38.2897	51.0669	69.189
Ao3042_01128	AO1008_03571	71.0638	62.2195	73.7782	72.2091	81.6043	72.7883
Ao3042_01129	AO1008_03572	6.24883	3.51931	2.24663	9.83565	8.29647	5.13935
Ao3042_01130	AO1008_03573	94.1805	53.7061	86.2983	66.2265	101.442	75.0569
Ao3042_01131	AO1008_03574	195.387	135.928	142.733	130.667	197.674	96.8101
Ao3042_01132	AO1008_03575	232.205	235.224	248.917	194.115	227.774	267.91
Ao3042_01133	AO1008_03576	19.5096	15.4816	18.6143	17.9175	20.787	12.7138
Ao3042_01134	AO1008_03577	0	0	0	0	0	0
Ao3042_01135	AO1008_03578	6.99509	3.00656	3.59986	3.90584	11.8389	5.26938
Ao3042_01136	AO1008_03579	29.4074	24.0475	33.9995	30.5066	68.9733	82.4758
Ao3042_01137	AO1008_03580	1.00622	1.49846	2.28709	0.188532	0.257129	0
Ao3042_01138	AO1008_03581	4.72437	3.67781	4.06851	7.87486	5.25492	5.23729
Ao3042_01139	AO1008_03582	3.67074	3.99059	3.70013	12.2185	8.24392	6.65624
Ao3042_01140	AO1008_03583	1.45618	7.25245	10.4163	0.856415	5.3429	27.1575
Ao3042_01141	AO1008_03584	0	0	0	0	0	0
Ao3042_01142	AO1008_03585	0	0	0	0	0	0
Ao3042_01143	AO1008_03586	0	0.0986827	0	0.124311	0	0.0658846
Ao3042_01144	AO1008_03587	2.31863	4.47292	1.88895	1.24911	3.8411	9.26088
Ao3042_01145	AO1008_03588	2.08538	4.11134	3.20753	1.29464	1.56643	6.7089
Ao3042_01146	AO1008_03589	130.844	115.868	133.447	86.8052	117.461	209.039
Ao3042_01147	AO1008_03590	21.9153	7.4648	5.48195	25.0374	18.1562	6.41692
Ao3042_01148	AO1008_03591	3.03686	1.01516	2.40536	1.09581	2.23811	5.61365
Ao3042_01149	AO1008_03592	12.2342	13.5159	14.8485	6.66161	6.89719	9.9778
Ao3042_01150	AO1008_03593	21.8005	21.0671	27.7431	22.0569	19.9042	60.7018
Ao3042_01151	AO1008_03594	10.0646	16.4079	15.5547	10.0469	15.3588	16.1738
Ao3042_01152	AO1008_03595	2.3107	3.41964	2.79274	2.06723	5.74635	5.75161
Ao3042_01153	AO1008_03596	2.83358	3.02291	6.63918	2.22038	5.6161	3.92211
Ao3042_01154	AO1008_03597	1.65193	2.47848	3.76815	0	3.4054	11.8759
Ao3042_01155	AO1008_03598	3.19977	4.03939	2.84372	2.01733	3.82145	4.4623
Ao3042_01156	AO1008_03599	1.40749	0.626623	3.99227	0	0.179136	0.139329
Ao3042_01157	AO1008_03600	5.69001	4.91945	3.36033	0.221219	0.60263	1.64119
Ao3042_01158	AO1008_03601	8.34262	11.7752	10.6266	3.43603	7.264	15.6217
Ao3042_01159	AO1008_03602	1.80934	4.2355	0.996116	1.89534	3.15312	3.57158
Ao3042_01160	AO1008_03603	0	1.31703	1.25562	0.414188	1.13013	2.41358
Ao3042_01161	AO1008_03604	0	0.26064	0.166317	0	0.335178	0.260954
Ao3042_01162	AO1008_03605	0	0.216727	0	0	0	0.144558
Ao3042_01163	AO1008_03606	0.110721	0.984179	0.83679	0	0	0
Ao3042_01164	AO1008_03607	0.0877223	0	0.496915	0	0	0
Ao3042_01165	AO1008_03608	0.60936	0	1.1575	0.573746	1.1757	0
Ao3042_01166	AO1008_03609	0	0.234347	0.596916	0	0.201005	0.312576
Ao3042_01167	AO1008_03610	0.219012	0	0	0	0	0
Ao3042_01168	AO1008_03611	1.17024	0.349202	0	0.219612	0	0
Ao3042_01169	AO1008_03612	0.986291	0.244278	0	0.153723	0	0
Ao3042_01170	AO1008_03613	11.4661	2.01063	6.29179	0.575341	0	0.243903
Ao3042_01172	AO1008_03615	2.98941	0.911175	10.3047	1.71326	7.8391	16.3179
Ao3042_01173	AO1008_03616	7.08398	9.1485	23.8878	5.03795	15.6934	59.9471
Ao3042_01174	#N/A	2.05065	4.21237	0	0.240783	0.328681	0.765245
Ao3042_01175	AO1008_03618	11.3775	13.2303	5.49556	1.38047	2.50456	4.76945
Ao3042_01176	AO1008_03619	35.7745	51.6089	41.6853	9.15757	16.8371	54.771
Ao3042_01177	AO1008_03620	215.826	542.965	186.915	36.1632	29.2276	29.7415
Ao3042_01178	AO1008_03621	17.6762	25.3991	13.0793	8.96832	11.7029	10.7553
Ao3042_01179	AO1008_03622	0.448651	0.997074	0.211929	0.523126	0.284984	0.110887
Ao3042_01180	AO1008_03623	0.160119	0.118397	0.302275	0.149127	0.304497	0.632274
Ao3042_01181	AO1008_03624	54.1258	166.123	144.821	50.3226	101.563	295.699
Ao3042_01182	AO1008_03625	27.2569	33.2185	41.9124	27.2494	41.7746	54.1167
Ao3042_01183	AO1008_03626	69.7667	115.298	83.5772	75.051	97.3893	88.3623
Ao3042_01184	AO1008_03627	10.7656	21.619	19.0255	15.7217	12.3727	18.6299
Ao3042_01185	AO1008_03628	1.52842	6.18629	4.28515	11.4225	6.1178	6.42655
Ao3042_01186	AO1008_03630	10.6902	50.6083	42.6209	5.88846	17.4204	44.6194
Ao3042_01187	AO1008_03631	37.76	11.6126	32.7125	19.3639	6.2899	2.58215
Ao3042_01188	AO1008_03632	0.226658	0	0	0.637808	0	0
Ao3042_01189	AO1008_03633	0.554744	0.481278	0.0615231	0.0303225	0	0.482178
Ao3042_01190	AO1008_03634	114.567	196.425	123.811	14.3338	52.8859	284.338
Ao3042_01191	AO1008_03635	39.2407	78.798	70.2348	47.0589	42.5625	68.1055
Ao3042_01192	AO1008_03636	162.604	89.6131	67.2722	117.88	153.036	97.5338
Ao3042_01193	AO1008_03637	0	0	0	0	0	0
Ao3042_01194	AO1008_03638	3.4877	3.5201	1.64504	5.51623	2.20775	4.98745
Ao3042_01195	AO1008_03639	1.81736	3.76502	2.23071	3.13296	2.99733	2.33346
Ao3042_01196	AO1008_03640	4.63046	12.2494	7.49889	11.4142	11.6236	14.2771
Ao3042_01197	AO1008_03641	1.34312	28.6918	27.1711	0.12542	3.07572	7.57634
Ao3042_01198	AO1008_03642	0.772497	0.287465	2.92575	0	0.246625	0.19163
Ao3042_01199	AO1008_03643	1.68523	0.83587	3.54533	0.701201	0.47806	1.1145
Ao3042_01200	AO1008_03644	18.3498	14.1903	17.3914	75.2849	35.6183	38.0431
Ao3042_01201	AO1008_03645	5.04175	17.6935	11.9849	0.748365	3.59015	10.2297
Ao3042_01202	AO1008_03646	1.13347	1.93492	1.6463	5.84872	1.21648	0.947109
Ao3042_01203	AO1008_03647	3.63615	5.47297	2.4144	3.25911	3.58255	1.26227
Ao3042_01204	AO1008_03648	0.279281	0.826657	0.879034	0.520547	1.18122	0.275867
Ao3042_01205	AO1008_03649	4.52881	8.85443	5.51478	0.544063	2.77695	7.35287
Ao3042_01206	AO1008_03650	27.6243	36.4675	34.2497	4.76215	15.1611	31.8326
Ao3042_01207	AO1008_03651	27.9742	16.6592	8.82059	29.1107	18.8084	17.9039
Ao3042_01208	AO1008_03652	76.915	42.2524	26.5584	38.147	35.5688	45.2194
Ao3042_01209	AO1008_03653	34.1494	26.337	20.8257	8.71281	19.5831	39.5956
Ao3042_01210	AO1008_03654	32.7988	32.0011	13.2343	8.60323	15.2777	58.517
Ao3042_01211	AO1008_03655	15.0622	13.5454	4.8782	9.63215	14.0738	21.6937
Ao3042_01212	AO1008_03656	17.0678	38.6059	60.6128	29.6843	29.934	43.773
Ao3042_01213	AO1008_03657	0	2.80724	19.8024	4.97755	0.492344	16.3016
Ao3042_01214	AO1008_03658	60.7285	65.6043	46.1201	43.7629	47.0345	39.8993
Ao3042_01215	AO1008_03659	3.09877	1.55649	2.80656	5.65172	3.68862	3.8513
Ao3042_01216	AO1008_03660	57.4144	64.4976	57.9954	26.8705	39.9841	42.9516
Ao3042_01217	AO1008_03661	0.420871	1.24913	0.795844	0	0	1.11098
Ao3042_01218	AO1008_03662	0.669998	0.5667	0.180768	0.267633	0.485869	0.18911
Ao3042_01219	AO1008_03663	0.175445	0.129787	0.331277	0	0	0.173258
Ao3042_01220	AO1008_03664	0.172271	0.256117	0	0	0	0
Ao3042_01221	AO1008_03665	0.426294	0.643175	0	0	0.552685	0
Ao3042_01222	AO1008_03666	0	0	0	0	0	0
Ao3042_01223	AO1008_03667	8.22727	7.29836	4.62015	8.20152	9.05241	9.70698
Ao3042_01224	AO1008_03668	39.129	32.4234	36.5779	45.999	41.4063	35.101
Ao3042_01225	AO1008_03669	36.7477	35.0118	46.9353	27.3834	33.518	33.4841
Ao3042_01226	AO1008_03670	55.979	44.5818	39.7166	86.9446	64.245	59.0069
Ao3042_01227	AO1008_03671	12.2689	9.19032	9.16791	15.4636	19.7871	15.794
Ao3042_01228	AO1008_03672	14.0199	12.4124	13.2396	14.3915	11.9113	12.3428
Ao3042_01229	AO1008_03673	4.75115	8.33789	6.53598	4.01545	5.06209	6.5656
Ao3042_01230	AO1008_03674	19.341	16.553	17.1126	31.7925	22.2765	22.8409
Ao3042_01231	AO1008_03675	160.334	247.795	211.563	661.871	416.51	130.182
Ao3042_01232	AO1008_03676	36.9512	35.4679	33.9467	57.0433	57.1262	47.1207
Ao3042_01233	AO1008_03677	12.6717	7.59564	12.9012	15.1161	10.6923	11.6645
Ao3042_01234	AO1008_03678	3.86044	1.8506	3.43271	5.61372	6.49158	6.7355
Ao3042_01235	AO1008_03679	85.8117	32.9238	35.9757	71.7127	113.707	43.8897
Ao3042_01236	AO1008_03680	69.2682	73.3307	62.4765	68.621	69.0718	62.8374
Ao3042_01237	AO1008_03681	9.07707	6.3203	8.9061	6.05299	7.78918	5.53687
Ao3042_01238	AO1008_03682	12.1394	14.0798	15.5668	22.4165	20.9538	19.0602
Ao3042_01239	AO1008_03683	34.2587	24.109	30.9152	35.4315	33.7551	34.0027
Ao3042_01240	AO1008_03684	16.7517	14.4971	21.8885	1.46623	6.44044	12.9986
Ao3042_01241	AO1008_03685	255.964	220.745	295.029	469.729	274.933	404.532
Ao3042_01242	AO1008_03686	67.4793	55.8775	32.3757	54.1212	44.3177	31.5339
Ao3042_01243	AO1008_03687	56.3625	69.0526	64.7661	50.0969	53.7419	50.0973
Ao3042_01244	AO1008_03688	0	0	0	0	0	0
Ao3042_01245	AO1008_03689	2975.62	183.842	259.468	2100.51	3503.2	230.03
Ao3042_01246	AO1008_03690	3.1138	5.07903	4.14405	2.22435	3.85312	3.8072
Ao3042_01247	AO1008_03691	35.3541	30.2283	32.8401	54.076	43.2503	32.8467
Ao3042_01248	AO1008_03692	13.1602	9.46677	16.1597	16.3592	19.4601	22.3758
Ao3042_01249	AO1008_03693	114.868	179.999	168.769	124.343	155.945	152.431
Ao3042_01250	AO1008_03694	8.37742	7.0098	14.8584	17.973	14.8091	15.2904
Ao3042_01251	AO1008_03695	31.9507	46.7621	60.1479	71.534	74.8559	90.9357
Ao3042_01252	AO1008_03696	9.86136	14.7746	17.0701	21.3967	16.628	21.5397
Ao3042_01253	AO1008_03697	212.193	189.991	155.289	392.716	266.753	248.874
Ao3042_01254	AO1008_03698	1.54236	2.15492	1.77964	0.638608	1.41274	2.62293
Ao3042_01255	AO1008_03699	25.9092	18.2474	19.4212	31.7737	32.5597	21.8159
Ao3042_01256	AO1008_03700	27.0561	24.5131	24.323	20.7846	18.7493	24.6127
Ao3042_01257	AO1008_03701	26.556	21.6028	19.7877	24.1919	18.6935	16.78
Ao3042_01258	AO1008_03702	19.357	18.6733	19.5563	36.3343	35.8062	45.9973
Ao3042_01259	AO1008_03703	41.0962	35.6637	49.3431	32.8476	30.2092	26.8269
Ao3042_01260	AO1008_03704	202.379	168.293	204.334	254.902	300.744	314.356
Ao3042_01261	AO1008_03705	24.3985	19.9805	23.68	28.3567	39.41	25.9334
Ao3042_01262	AO1008_03706	286.826	311.691	254.991	293.209	244.46	173.725
Ao3042_01263	AO1008_03707	15.0651	18.7212	23.0589	8.08959	12.3383	8.98171
Ao3042_01264	AO1008_03708	109.675	139.66	119.38	310.569	177.817	129.9
Ao3042_01265	AO1008_03709	20.1744	19.4886	27.9779	23.6062	26.0346	25.435
Ao3042_01266	AO1008_03710	29.1294	33.7016	35.4966	22.0737	25.6775	16.1134
Ao3042_01267	AO1008_00441	91.5446	79.8301	70.6374	57.1978	81.8114	60.546
Ao3042_01268	AO1008_00442	18.9954	15.5187	17.4891	46.2648	30.7702	30.0257
Ao3042_01269	AO1008_00443	17.2112	9.33228	57.1911	11.7392	9.15212	20.8774
Ao3042_01270	AO1008_00444	194.828	249.576	302.703	98.6619	148.811	99.6721
Ao3042_01271	AO1008_00445	331.318	381.104	410.013	147.095	187.944	246.474
Ao3042_01272	AO1008_00446	0	0	0	0	0	0
Ao3042_01273	AO1008_00447	0	0.0864222	1.69625	0	0	0
Ao3042_01274	AO1008_00448	17.379	15.8707	21.2629	19.2939	16.6301	14.8423
Ao3042_01275	AO1008_00449	123.273	131.715	100.671	210.826	143.264	103.59
Ao3042_01276	AO1008_00450	40.0061	51.5211	55.2231	50.009	55.1451	85.1779
Ao3042_01277	AO1008_00451	64.6479	67.8533	61.7977	102.022	96.8362	76.8745
Ao3042_01278	AO1008_00452	37.5561	26.7948	59.3744	30.8544	32.2361	21.225
Ao3042_01279	AO1008_00453	58.4795	48.5984	89.5503	42.7521	52.4519	50.9109
Ao3042_01280	AO1008_00454	60.5463	54.2037	46.0475	59.9477	56.1444	35.0963
Ao3042_01281	AO1008_00455	38.2868	16.4135	12.6685	34.1615	43.6832	35.409
Ao3042_01283	AO1008_00457	36.4524	28.2262	30.9735	16.7602	25.3291	27.5245
Ao3042_01284	AO1008_00458	49.4943	56.6028	43.4197	45.3006	57.2208	72.4086
Ao3042_01285	AO1008_00459	59.4201	55.9971	46.2194	118.958	77.7701	61.0788
Ao3042_01286	AO1008_00460	472.985	584.872	705.88	404.553	562.271	644.996
Ao3042_01287	AO1008_00461	48.6027	54.7599	65.973	54.2483	65.9908	62.5061
Ao3042_01288	AO1008_02022	58.4746	59.9955	55.3829	83.7658	67.0122	50.6918
Ao3042_01289	AO1008_02023	47.1933	46.9256	47.758	86.0044	84.1921	70.027
Ao3042_01290	AO1008_02024	59.5853	53.6401	58.5384	87.3668	84.9621	97.8849
Ao3042_01291	AO1008_10480	76.7963	36.6403	34.7812	60.5754	105.775	37.2702
Ao3042_01292	AO1008_10479	25.6436	34.0186	38.5461	26.6657	38.0869	30.1057
Ao3042_01293	AO1008_10478	29.915	26.4871	22.23	28.9181	36.5115	23.8165
Ao3042_01295	AO1008_10476	9.86111	7.45068	11.7189	6.32473	20.642	74.3937
Ao3042_01296	AO1008_10475	22.9592	34.3219	40.3485	35.0538	35.6669	32.4029
Ao3042_01297	AO1008_10474	416.849	265.724	244.411	700.92	568.713	476.411
Ao3042_01298	AO1008_10473	27.1089	18.9455	20.9414	40.0873	27.432	23.2891
Ao3042_01299	AO1008_10472	53.8856	52.9279	60.7967	49.3101	41.5179	49.1878
Ao3042_01300	AO1008_10471	1836.1	940.213	1578.08	426.044	687.522	657.105
Ao3042_01301	AO1008_10470	0.632388	0	0.596806	0.0736024	0.400756	0.156031
Ao3042_01302	AO1008_10469	205.266	153.83	224.606	114.615	171.438	165.34
Ao3042_01303	AO1008_10468	57.0632	44.5001	69.546	40.003	46.747	65.6521
Ao3042_01304	AO1008_10467	3.68041	21.8356	11.9276	0.490897	1.67193	5.98286
Ao3042_01305	AO1008_10466	2.55491	10.3031	7.74578	0.86517	1.76648	12.1509
Ao3042_01306	AO1008_10465	8.167	5.03741	4.40716	8.97207	7.77409	6.81995
Ao3042_01308	AO1008_10463	12.9484	9.73878	6.22535	2.52977	12.5555	20.7417
Ao3042_01309	AO1008_10462	6.83898	7.42496	8.74864	0.346047	1.65141	3.30009
Ao3042_01310	AO1008_10461	1.98666	1.01306	0	0	0	2.01419
Ao3042_01311	AO1008_10460	109.413	95.7331	76.3877	6.95736	22.5962	11.765
Ao3042_01312	AO1008_10459	0	0	0	0	0	0
Ao3042_01313	AO1008_10458	0	0.252045	0.641767	0	0	0
Ao3042_01314	AO1008_10457	0.286173	0.637116	0.811768	0	0.182138	0
Ao3042_01315	AO1008_10456	0.526494	0.3336	0.283941	1.33064	0.953257	0.593872
Ao3042_01316	AO1008_10455	0	0	0	0	0	0.06122
Ao3042_01317	AO1008_10454	1.76472	102.336	364.529	0	5.92029	14.8166
Ao3042_01318	AO1008_11567	0	0.482113	0.819879	0.202363	0.413382	1.50134
Ao3042_01319	AO1008_11566	0.110155	0.652742	0	0	0	0
Ao3042_01320	AO1008_11565	0	0.156075	0	0	0	0
Ao3042_01321	AO1008_11564	0.468458	1.61632	0	0	0	0.154139
Ao3042_01322	AO1008_11563	0.116722	1.38383	0.441142	0.435607	0.593307	1.73127
Ao3042_01323	AO1008_11562	0.518927	1.53693	1.17633	0.870944	0.527113	0.82053
Ao3042_01324	AO1008_11561	0	1.18308	0.377897	0	0.126753	0.0493771
Ao3042_01325	AO1008_11560	0.0597012	0.0440185	0	0.0832028	0.150893	0.0882047
Ao3042_01326	AO1008_11559	0.0916414	0.135615	0	0	0	0
Ao3042_01327	AO1008_11558	71.9963	40.6757	19.8383	148.344	120.85	56.735
Ao3042_01328	AO1008_11557	26.0553	12.9894	16.3386	64.647	42.4462	42.5145
Ao3042_01329	AO1008_11556	53.5753	17.9427	8.14687	157.438	80.523	38.4234
Ao3042_01330	AO1008_11555	6.67194	6.13744	8.6083	8.11147	7.58971	6.24707
Ao3042_01331	AO1008_11554	366.501	140.939	70.0725	307.324	547.511	412.242
Ao3042_01332	AO1008_11553	53.4559	31.4012	33.7498	41.2762	52.6635	37.4373
Ao3042_01333	AO1008_11552	49.2258	63.2536	45.6831	202.473	99.534	78.2561
Ao3042_01334	AO1008_11551	13.3792	27.088	9.30742	7.95499	7.14557	4.95473
Ao3042_01335	AO1008_11550	42.4721	31.8467	54.396	44.8891	50.3854	39.515
Ao3042_01336	AO1008_11549	52.1546	56.9403	57.6989	109.804	79.28	82.0043
Ao3042_01337	AO1008_11548	0	1.46168	0	0	0	6.1989
Ao3042_01338	AO1008_11547	1.50234	20.1198	22.0452	2.98884	2.1576	2.60812
Ao3042_01339	AO1008_11546	6.40476	7.57743	12.091	13.2723	11.0634	12.0922
Ao3042_01340	AO1008_11545	25.2405	31.1933	28.8257	19.0982	16.2757	17.2689
Ao3042_01341	AO1008_11544	64.3962	39.5637	52.9519	48.6154	88.6613	132.329
Ao3042_01342	AO1008_11543	4.17301	4.65374	3.59274	6.27096	5.28821	6.14132
Ao3042_01343	AO1008_11542	136.678	135.836	157.911	172.583	154.286	113.227
Ao3042_01344	AO1008_11541	0	0	0	0	22.5137	0
Ao3042_01345	AO1008_11540	132.712	212.584	329.782	128.973	225.982	341.181
Ao3042_01346	AO1008_11539	26.3956	43.7343	28.943	71.2	26.8742	70.1233
Ao3042_01347	AO1008_11538	4.80317	5.67195	1.02021	6.60608	2.78718	6.45454
Ao3042_01348	AO1008_11537	64.8172	107.298	111.314	61.5009	63.0197	76.5696
Ao3042_01349	AO1008_11536	91.2736	84.6171	86.8785	161.282	111.238	80.0144
Ao3042_01350	AO1008_11535	0	0	0	2.41609	9.09445	0
Ao3042_01351	AO1008_11534	104.386	100.147	131.033	73.4014	90.0457	72.8395
Ao3042_01352	AO1008_11533	111.468	96.5002	87.49	103.808	100.337	55.0839
Ao3042_01353	AO1008_11532	31.8067	63.488	73.4224	46.5282	66.7872	68.4155
Ao3042_01354	AO1008_11531	9.21552	11.684	18.1848	11.6306	15.4143	17.2276
Ao3042_01355	AO1008_11530	11.2469	16.1231	20.8532	17.3754	17.4204	19.3766
Ao3042_01356	AO1008_11529	13.0663	20.0202	22.5782	31.8762	26.8138	35.6611
Ao3042_01357	AO1008_11528	53.8038	31.8447	39.8355	48.0102	56.9786	29.7678
Ao3042_01358	AO1008_11527	3.36339	4.72273	7.19559	3.49642	3.30523	3.02316
Ao3042_01359	AO1008_11526	0.0304412	0	0.344335	0	0	0
Ao3042_01360	AO1008_11525	7.55139	7.50758	5.63513	5.5556	6.79181	6.28734
Ao3042_01361	AO1008_11524	4.76266	6.11892	5.74804	3.34465	4.45375	9.94197
Ao3042_01362	AO1008_11523	43.7753	26.9987	26.8334	111.041	67.3722	49.7896
Ao3042_01363	AO1008_11522	250.772	236.794	242.54	590.192	238.997	419.553
Ao3042_01364	AO1008_11521	8.59469	12.5476	11.5505	13.3727	23.8926	47.1139
Ao3042_01365	AO1008_11520	36.8354	37.9612	41.8735	325.415	300.141	210.449
Ao3042_01366	AO1008_11519	13.0164	10.195	15.8356	10.4292	11.3195	9.05643
Ao3042_01367	AO1008_11518	41.8195	57.0531	56.3393	42.6303	62.5547	79.0604
Ao3042_01369	AO1008_11516	0.690881	0	0.436553	0	0.589595	0
Ao3042_01370	AO1008_11515	76.0148	78.8827	81.3911	89.4722	64.6844	67.42
Ao3042_01371	AO1008_11514	44.1613	62.1464	42.5051	39.5858	53.4447	68.2115
Ao3042_01372	AO1008_11513	40.7063	31.9256	28.2452	4.20746	16.4725	7.32507
Ao3042_01373	AO1008_11512	12.8162	10.5199	14.7519	10.8776	16.479	15.6038
Ao3042_01374	AO1008_11511	263.097	252.894	244.394	593.442	271.178	373.86
Ao3042_01375	AO1008_11510	242.395	268.896	281.977	604.87	242.443	482.052
Ao3042_01376	AO1008_11509	10.4732	14.3343	16.6689	16.638	17.2237	23.3028
Ao3042_01377	AO1008_11508	5.43382	5.17923	3.8263	8.66844	5.14149	7.09556
Ao3042_01378	AO1008_11507	2.46887	7.58234	31.4555	0.923521	1.25881	20.3883
Ao3042_01379	AO1008_11506	0.642468	0	0	0.615024	1.68969	0
Ao3042_01380	AO1008_11505	8.73935	3.07534	1.9635	13.8815	10.8085	10.4027
Ao3042_01381	AO1008_11504	13.5931	16.6742	15.022	15.3744	10.2391	13.2261
Ao3042_01382	AO1008_11503	1.00608	22.3889	56.4774	0.175545	1.2741	7.38117
Ao3042_01383	AO1008_11502	36.331	34.8608	31.0962	27.3603	38.8146	110.036
Ao3042_01384	AO1008_11501	29.7087	24.2417	119.769	4.17118	9.30444	25.5858
Ao3042_01385	AO1008_11500	11.4412	44.6146	36.6839	13.2135	46.5172	93.2606
Ao3042_01386	AO1008_11499	9.53511	9.66553	11.3361	13.4502	11.9015	14.4218
Ao3042_01387	AO1008_11498	189.107	65.0338	111.182	212.798	182.684	180.943
Ao3042_01389	AO1008_11496	23.8443	9.07886	15.7249	5.47222	11.2304	8.22414
Ao3042_01390	AO1008_11495	159.193	69.2781	70.8719	49.6932	85.1973	98.996
Ao3042_01391	AO1008_11494	19.9945	12.5158	22.2929	30.0738	35.3421	30.1926
Ao3042_01392	AO1008_11493	0	0.133897	0	0	0.114795	0
Ao3042_01393	AO1008_11492	12.5386	65.1446	26.1448	2.21101	22.0294	107.411
Ao3042_01394	AO1008_11491	0.260165	2.30937	4.58484	0.0807943	0.329976	1.02764
Ao3042_01395	AO1008_11490	0.774101	10.1252	35.779	0.0514358	1.04984	3.10786
Ao3042_01396	AO1008_11489	0	0	0	0	0	0
Ao3042_01397	AO1008_11488	0	0	0.292013	0	0	0
Ao3042_01398	AO1008_11487	0	0	0	0	0	0
Ao3042_01399	AO1008_11486	0	0	0	0	0	0
Ao3042_01400	#N/A	0	0	0.786121	0	0.396296	0
Ao3042_01401	AO1008_11484	0.353287	0.392034	0.667093	0.411458	0.3361	1.91891
Ao3042_01402	AO1008_11483	0.820369	0.405721	0.25852	2.68152	0.347947	3.92439
Ao3042_01403	AO1008_11482	0	0	0	0	0	0
Ao3042_01405	AO1008_11480	0.0914469	0.405978	0.345378	0	0.11602	1.08387
Ao3042_01406	AO1008_11479	11.3058	14.2382	34.3675	10.4462	11.8007	11.9813
Ao3042_01407	AO1008_11478	0.826868	0.307939	1.17482	0	0.528429	0
Ao3042_01408	AO1008_11477	0.373439	0.922789	44.9388	0	0.474792	4.80218
Ao3042_01409	AO1008_11476	1.56459	1.93375	0.739436	2.55628	1.16082	3.35416
Ao3042_01410	AO1008_11475	0	0	0	0	0	0
Ao3042_01411	AO1008_11474	0.159512	0	0	0	0.203261	0
Ao3042_01412	AO1008_11473	1.02053	1.82401	0.77326	1.14743	1.56499	1.21577
Ao3042_01413	AO1008_11472	0.711904	1.231	1.5696	1.10712	1.05558	1.99471
Ao3042_01414	AO1008_11471	0	0	0	0	0	0
Ao3042_01415	AO1008_11470	0	0	0	0	0	0
Ao3042_01416	AO1008_11469	5.71966	16.2029	15.8165	2.77612	3.26832	5.48748
Ao3042_01417	AO1008_11468	0	0	0	0	0	0
Ao3042_01418	AO1008_11467	0	0	0	0	0	0
Ao3042_01419	AO1008_11466	0	0	0	0	0	0
Ao3042_01420	AO1008_11465	0.515743	0.0936416	0.238743	0.117897	0.0803016	0.0624741
Ao3042_01422	AO1008_11463	11.0214	5.61911	6.45644	25.0555	18.4972	12.8289
Ao3042_01423	AO1008_11462	4.71767	2.40505	1.69852	6.45931	5.5329	3.55048
Ao3042_01424	AO1008_11461	9.88583	9.55348	8.08175	14.063	13.1235	11.2181
Ao3042_01425	AO1008_11460	0.0895459	0	0	0	0	0
Ao3042_01426	AO1008_11459	0	0	0.340308	0	0	0.0889943
Ao3042_01427	AO1008_11458	1.4026	0.518792	0.662103	29.158	11.0081	6.49275
Ao3042_01428	AO1008_11457	1.19577	5.46705	1.14497	20.5591	15.6782	23.5703
Ao3042_01429	AO1008_11456	0.192289	0	0.120949	0.119301	0.0811782	0.0632299
Ao3042_01430	AO1008_11455	6.83049	16.899	24.816	29.9082	58.0341	82.9019
Ao3042_01431	AO1008_11454	0.198484	0.734636	0.749799	0.277545	1.38571	3.03975
Ao3042_01432	AO1008_11453	2.6284	15.9287	46.9043	0.789846	1.2903	7.8696
Ao3042_01433	AO1008_11452	0	10.3443	35.1859	0	0.268772	2.19643
Ao3042_01434	AO1008_11451	2.79094	5.36721	11.4939	0.307052	2.72042	4.22992
Ao3042_01435	AO1008_11450	0.55192	0	2.1112	0	0	1.11345
Ao3042_01436	AO1008_11449	0.40821	0.608004	2.31978	1.33867	0.521665	1.82365
Ao3042_01437	AO1008_11448	0.540594	2.94827	2.38783	0	3.21897	38.599
Ao3042_01438	AO1008_11447	5.80266	10.1274	10.57	3.67139	7.10454	10.2401
Ao3042_01439	AO1008_11446	1.01169	3.00338	2.18659	1.48528	0.735955	2.43258
Ao3042_01440	AO1008_11445	1.10751	1.82434	1.86067	1.26333	2.34662	1.09546
Ao3042_01441	AO1008_11444	13.0272	3.5493	5.27758	26.3138	40.0768	20.7837
Ao3042_01442	AO1008_11443	21.1443	7.08029	8.87203	66.2321	109.923	67.9676
Ao3042_01443	AO1008_11442	11.1903	14.7891	22.3354	20.4943	24.6074	26.081
Ao3042_01444	AO1008_11441	10.8655	13.4257	20.0213	8.45858	9.76679	13.8327
Ao3042_01445	AO1008_11440	6.46104	17.7012	10.7833	17.6343	19.464	33.1261
Ao3042_01446	AO1008_11439	174.074	375.896	192.266	21.1224	84.2746	137.751
Ao3042_01447	AO1008_11438	0.437213	0.977621	0.414265	0	0	0.868669
Ao3042_01448	AO1008_11437	0.670317	2.49075	1.58561	0.313475	0.427304	2.32527
Ao3042_01449	AO1008_11436	1.63565	1.49723	2.05841	5.07736	2.96197	1.76831
Ao3042_01450	AO1008_11435	1.89304	2.69433	1.7202	5.02565	4.79692	4.77367
Ao3042_01451	AO1008_11434	13.3219	18.4498	21.8949	21.1113	23.7981	22.8034
Ao3042_01452	AO1008_11433	5.22356	5.56023	2.59586	49.7018	18.8355	10.3187
Ao3042_01453	AO1008_11432	142.138	103.689	155.154	613.852	939.066	687.896
Ao3042_01454	AO1008_11431	4.65166	174.046	641.068	5.39742	14.4373	37.0819
Ao3042_01455	AO1008_11430	8.14691	5.93978	9.18982	14.2868	15.2826	15.7065
Ao3042_01456	AO1008_11429	12.9674	17.4209	32.1298	23.2256	19.1363	30.1584
Ao3042_01459	AO1008_10695	0	0	0	0	0	0
Ao3042_01460	AO1008_10694	0.187273	0	0	0.11618	0.474313	0.123152
Ao3042_01461	AO1008_10693	13.2069	3.78217	2.10729	46.8605	20.6811	55.6487
Ao3042_01462	AO1008_10692	21.6284	21.3611	10.4046	5.58722	27.3874	28.6458
Ao3042_01463	AO1008_10691	0.671561	6.77445	1.26968	0.376261	1.02524	5.31673
Ao3042_01464	AO1008_10690	34.5493	10.3113	108.937	0	2.01005	6.87668
Ao3042_01465	AO1008_10689	0.739167	2.19477	1.95722	0	0	0.439166
Ao3042_01467	AO1008_09817	1.40247	4.17087	5.64092	1.1482	2.68341	4.17149
Ao3042_01468	AO1008_09816	1.98926	1.53544	0.32661	0.56404	1.42605	1.45191
Ao3042_01469	AO1008_09815	0.0537744	2.06455	2.53607	0.0500195	0.204181	0.795341
Ao3042_01470	AO1008_09814	0.243301	4.35844	2.30688	0	0	0.725913
Ao3042_01471	AO1008_09813	4.53394	17.068	20.0557	0.329752	0.897613	3.84486
Ao3042_01472	AO1008_09812	0	0.134181	0	0	0	0.0895586
Ao3042_01473	AO1008_09811	0.672812	0.504906	0.639575	0.317236	0	0.335991
Ao3042_01474	AO1008_09810	2.73803	2.3205	2.46479	0.608638	0.99499	3.48317
Ao3042_01475	AO1008_09809	62.3156	61.6771	22.2574	59.1559	175.206	804.505
Ao3042_01476	AO1008_09808	4.63004	4.29539	3.83084	3.51462	6.07849	9.88454
Ao3042_01477	AO1008_09807	5.47603	0.690659	0.660516	0.217408	0.148057	0.345627
Ao3042_01478	AO1008_09806	3.19229	0.499458	0	0.314296	0	0
Ao3042_01479	AO1008_09805	0.396384	0	0	0	0.222835	0
Ao3042_01480	AO1008_09804	5.1316	0.124438	0.15883	0.15673	0.426722	0
Ao3042_01481	AO1008_09803	4.05964	1.57487	1.33638	1.65158	1.8013	4.0252
Ao3042_01482	AO1008_09802	3.94097	4.17748	5.32303	3.68121	2.86617	3.48322
Ao3042_01483	AO1008_09801	6.11781	5.46761	8.16987	1.96719	4.15227	3.12746
Ao3042_01484	AO1008_09800	45.7772	28.2156	21.6943	35.6167	63.2027	75.7828
Ao3042_01486	AO1008_09798	30.351	0	0	2.07685	32.1585	3.37136
Ao3042_01487	AO1008_09797	3.56572	0.820382	1.56173	0.515746	3.169	1.36586
Ao3042_01488	AO1008_09796	5.49859	6.48123	8.69565	4.77378	5.1793	4.54675
Ao3042_01489	AO1008_09795	0.244716	0.906951	0.462516	0.114192	0.311091	0.242045
Ao3042_01490	AO1008_09794	1.6814	0.38363	0.977992	0.36224	0.164493	0.127967
Ao3042_01491	AO1008_09793	2.05607	1.4033	1.34355	0.662829	1.00251	2.10771
Ao3042_01492	AO1008_09792	3.50927	2.36975	1.20715	2.08787	2.84566	3.0027
Ao3042_01493	AO1008_09791	2.28616	1.38089	0.686083	0.531585	0.723296	0.870871
Ao3042_01494	AO1008_09790	18.4864	13.8224	5.93888	1.77629	3.02316	9.97831
Ao3042_01495	AO1008_09789	14.1726	17.1173	4.65533	1.2811	0.349844	9.77119
Ao3042_01496	AO1008_09788	11.5142	22.2061	6.60248	1.74803	2.81235	5.38997
Ao3042_01497	AO1008_09787	156.369	51.7293	70.7079	18.1484	16.1995	33.5062
Ao3042_01498	AO1008_09786	47.3711	40.0684	47.3185	3.55087	5.96494	18.4985
Ao3042_01499	AO1008_09785	612.738	611.176	398.3	105.561	150.803	419.132
Ao3042_01500	AO1008_09784	10.1888	5.37271	4.77123	3.75142	6.40815	5.92555
Ao3042_01501	AO1008_09783	0	0	0	0	0	0
Ao3042_01502	AO1008_09782	0	0	0	0	0	0
Ao3042_01503	AO1008_09781	24.7106	16.4088	23.7717	27.695	35.4241	48.0587
Ao3042_01504	AO1008_09780	4.76169	10.8786	42.5733	2.04241	5.40101	6.49364
Ao3042_01505	AO1008_09779	4.36447	3.23367	6.72797	3.42879	4.52403	6.47304
Ao3042_01506	AO1008_09778	3.82984	7.2658	7.54505	2.71439	2.21707	4.52117
Ao3042_01507	AO1008_09777	0.0529807	0.391151	0.799547	0.0985587	0.402315	0.261191
Ao3042_01508	AO1008_09776	0	0	0	0	0	0
Ao3042_01509	AO1008_09775	7.71562	11.1626	10.2453	7.81948	9.24715	8.62307
Ao3042_01510	AO1008_09774	2.37382	92.7525	74.7658	0.95162	2.37823	3.0252
Ao3042_01511	AO1008_09773	3.04982	3.91686	3.03028	1.27074	3.05257	3.96157
Ao3042_01512	AO1008_09772	11.0909	5.84043	4.58854	6.64922	7.99148	4.94857
Ao3042_01513	AO1008_09771	5.81923	6.51273	8.75297	3.32442	4.9809	27.1296
Ao3042_01514	AO1008_09770	3.72903	3.20746	2.78365	2.18145	4.17969	12.5886
Ao3042_01515	AO1008_09769	6.4323	8.30904	7.37829	4.01937	5.47144	18.3275
Ao3042_01516	AO1008_09768	22.6625	8.75256	6.83717	41.2705	26.6128	28.1058
Ao3042_01517	AO1008_09767	57.4762	34.2861	24.6004	14.2527	24.6507	19.3178
Ao3042_01518	AO1008_09766	24.9409	10.4686	15.5312	5.52112	8.8628	14.761
Ao3042_01519	AO1008_00468	26.6396	27.1818	39.8241	34.7182	29.0328	38.5591
Ao3042_01520	AO1008_00467	18.0669	23.0229	25.4113	17.0304	13.7422	18.886
Ao3042_01521	AO1008_00466	38.9033	37.5044	40.9777	24.2691	26.8476	60.85
Ao3042_01523	AO1008_00464	23.7338	19.8494	26.4309	14.0701	13.1127	19.9819
Ao3042_01524	AO1008_00463	54.4845	34.2429	37.1758	59.2975	42.7351	38.7054
Ao3042_01525	AO1008_00462	53.4407	42.9932	51.2176	39.6668	47.9321	39.6983
Ao3042_01527	AO1008_01064	0	0.163732	0	0	0	0
Ao3042_01528	AO1008_01065	0.33386	0	0	0	0	0
Ao3042_01529	AO1008_01066	0	0	0	0.0284854	0	0
Ao3042_01530	#N/A	1.60066	0	0.137325	0.0677389	0.184397	0
Ao3042_01531	AO1008_10917	12.5567	27.4857	18.2615	21.2609	22.1648	9.63404
Ao3042_01532	AO1008_10918	1.07377	2.8294	1.57832	2.22657	3.9426	4.01164
Ao3042_01533	AO1008_10919	0.730541	3.37834	3.104	1.02114	2.31711	2.16466
Ao3042_01534	AO1008_10920	0.12705	2.07236	0.720468	0	0	0
Ao3042_01535	AO1008_10921	16.0057	30.0703	18.1684	20.5278	27.9476	23.2676
Ao3042_01536	AO1008_10922	3.59951	1.47218	0.234601	3.01201	5.36535	0.122776
Ao3042_01537	AO1008_10923	5.78427	0.481885	1.83208	4.5422	15.7239	0
Ao3042_01538	AO1008_10924	2.03852	8.37418	1.45009	0	0	0.760666
Ao3042_01539	AO1008_03256	18.7971	23.8472	13.7737	1.62985	4.64591	6.8878
Ao3042_01540	AO1008_03255	10.2546	11.7659	6.20447	0.766147	4.52331	4.19504
Ao3042_01541	AO1008_03254	1.36645	4.18595	2.62302	0	0	0
Ao3042_01546	AO1008_11270	4.84911	1.16172	10.3571	66.9704	7.37355	3.09909
Ao3042_01547	AO1008_11271	0.405374	1.65062	0.765719	0.0944836	0.514632	0.801137
Ao3042_01548	AO1008_11272	0.558047	1.66956	1.58892	0	0.358303	0.833851
Ao3042_01549	AO1008_11273	2.62201	5.21108	2.47506	2.97647	3.42846	2.34596
Ao3042_01550	AO1008_11274	20.7995	18.8603	15.5106	26.6567	28.3111	20.2095
Ao3042_01551	AO1008_11275	1.60348	2.39173	0	0.644667	0.586413	0.455338
Ao3042_01552	AO1008_11276	2.37338	3.05375	1.93397	1.91864	0	0.677354
Ao3042_01553	AO1008_11277	0.659228	0.782247	0.747764	0.369307	1.50938	1.30463
Ao3042_01554	AO1008_11278	1.20478	2.52704	11.7577	1.87197	2.03921	18.2536
Ao3042_01555	AO1008_11279	0	0	0	0	0	0.72916
Ao3042_01556	AO1008_11280	0.195334	0.144582	0.737867	0.455199	0.495846	0.675452
Ao3042_01557	AO1008_11281	0.0908682	0	0	0	0	0.0897483
Ao3042_01558	AO1008_11282	0.0899197	0.532217	1.35838	0	0.456287	0.355231
Ao3042_01560	AO1008_11284	44.275	62.1244	35.33	39.826	44.5863	88.3611
Ao3042_01561	AO1008_11285	4.23794	7.98918	5.33408	5.57308	4.63629	13.127
Ao3042_01562	AO1008_11286	12.5835	17.132	11.4062	13.4333	17.8618	12.1257
Ao3042_01563	AO1008_11287	13.0394	10.9402	4.482	8.11642	12.5652	13.5542
Ao3042_01564	AO1008_11288	30.853	19.1586	9.74338	39.969	51.5092	11.917
Ao3042_01565	AO1008_11289	11.8584	13.6681	6.94786	5.40838	10.8879	8.2356
Ao3042_01566	AO1008_11290	8.72733	3.80923	1.59296	1.96337	4.74884	6.24388
Ao3042_01567	AO1008_11291	4.78453	1.43475	2.42452	3.60643	2.0533	2.8649
Ao3042_01568	AO1008_11292	7.18155	6.90437	6.23794	6.41438	8.66725	7.82425
Ao3042_01569	AO1008_11293	2.95691	3.49707	1.53482	3.16608	3.27887	1.96981
Ao3042_01570	AO1008_11294	4.76452	1.69254	2.33956	6.48345	2.41853	6.30705
Ao3042_01571	AO1008_11295	0.767616	63.5903	11.5946	0	10.6004	1.01062
Ao3042_01572	AO1008_11296	0.481781	1.28368	0.181984	0.538874	1.71202	1.04712
Ao3042_01573	AO1008_11297	149.351	138.217	38.6304	388.147	544.207	737.633
Ao3042_01574	AO1008_11298	7.3901	14.7104	19.887	2.72495	11.9612	40.7263
Ao3042_01575	AO1008_11299	0.399732	4.73458	6.22901	0	0.380567	1.57987
Ao3042_01576	AO1008_11300	0.179092	0.662492	0.33818	0.166874	0	0
Ao3042_01577	AO1008_11301	2.86945	5.70538	4.57179	3.67635	3.86761	6.99626
Ao3042_01578	AO1008_08018	0	1.16146	0	0	0	0
Ao3042_01579	AO1008_08019	3.36136	3.98741	5.50964	5.07472	6.48672	7.82458
Ao3042_01580	AO1008_08020	59.8595	32.926	31.0186	120.317	106.546	130.941
Ao3042_01582	AO1008_08022	13.776	25.7989	21.8958	12.1848	14.7083	21.6113
Ao3042_01583	AO1008_08023	35.1225	51.3866	44.4394	26.5443	34.3754	37.2636
Ao3042_01584	AO1008_08024	57.175	56.9117	65.2362	51.8785	64.5447	57.3784
Ao3042_01585	AO1008_08025	30.4085	24.2065	30.7905	47.5261	31.8043	26.6852
Ao3042_01586	AO1008_08026	30.0372	12.875	7.97444	16.2572	14.5709	11.3008
Ao3042_01587	AO1008_08027	8.79726	7.26341	7.58314	13.4093	13.6916	10.5163
Ao3042_01590	AO1008_08030	656.548	837.781	936.686	1830.04	1543.89	1278.36
Ao3042_01591	AO1008_08031	113.293	23.6264	25.7577	78.3991	242.121	58.9932
Ao3042_01592	AO1008_08032	5.03426	5.90233	4.16072	1.76036	4.12852	3.93883
Ao3042_01593	AO1008_08033	0.0267378	0.0394213	0.201609	0	0	0
Ao3042_01594	AO1008_08034	0	0.23374	0	0	0.100189	0
Ao3042_01597	AO1008_08037	2.87152	5.34901	3.76924	4.35673	5.21744	7.01965
Ao3042_01598	AO1008_08038	2.62099	7.8847	20.9505	0.895375	3.76769	5.34912
Ao3042_01599	AO1008_08039	11.978	24.7723	21.5743	14.8616	21.9692	32.1076
Ao3042_01600	AO1008_08040	3.03697	7.55565	6.78219	1.58757	3.29897	2.89455
Ao3042_01602	AO1008_08042	0.145503	0	0	0.135944	0	0
Ao3042_01603	AO1008_08043	0	0	0	0	0	0
Ao3042_01604	AO1008_08044	0.956739	1.44789	0	0	2.48925	2.40451
Ao3042_01605	AO1008_08045	5.91892	5.65953	6.70632	12.219	11.5527	8.72407
Ao3042_01606	AO1008_08046	23.0257	21.9129	28.6459	31.0475	38.2606	45.1259
Ao3042_01607	AO1008_08047	12.3773	9.41693	10.8598	18.428	19.9839	14.3453
Ao3042_01608	AO1008_08048	23.1333	17.7985	22.7635	26.8824	18.7142	18.5682
Ao3042_01609	AO1008_08049	0	5.65158	3.4234	6.37056	8.267	1.35638
Ao3042_01610	AO1008_08050	14.2684	17.0489	45.957	20.3537	12.7721	15.557
Ao3042_01611	AO1008_08051	0.267255	3.85062	4.41302	19.8378	18.0272	36.7826
Ao3042_01612	AO1008_08052	1.47504	5.82312	7.61507	59.3998	49.9263	56.0596
Ao3042_01613	AO1008_08053	0.846864	0.20862	0.532769	0.197092	0.0894166	0.41783
Ao3042_01614	AO1008_08054	4.30825	1.15407	2.46781	7.2369	7.34132	4.74758
Ao3042_01615	AO1008_08055	2.1866	3.19839	2.86229	6.27783	2.13527	2.17188
Ao3042_01616	AO1008_08056	3.44403	7.2168	7.18192	15.9572	8.30151	5.51988
Ao3042_01618	AO1008_08058	1.29944	0.276196	1.40585	0	0.47389	1.28895
Ao3042_01620	AO1008_08060	43.0197	43.9052	101.367	4.63441	42.7853	11.9911
Ao3042_01621	AO1008_08061	22.4655	40.7092	128.859	1.11517	35.1986	3.18287
Ao3042_01624	AO1008_08064	0.531748	1.18016	5.35509	0.49545	1.46145	4.72628
Ao3042_01625	AO1008_08065	0.0429459	0.316495	0.364247	0	0.108487	0.021142
Ao3042_01626	AO1008_08066	0	0	0	0	0	0
Ao3042_01627	AO1008_08067	10.9583	3.82473	150.796	0.146036	0.297995	2.82531
Ao3042_01628	AO1008_08068	0.103793	0.102065	0	0.546587	0.349885	0.238592
Ao3042_01629	AO1008_08069	0.396612	0	0.149743	1.84686	1.20672	0.469824
Ao3042_01630	AO1008_08070	0	0	0	1.1609	0.452198	0.351469
Ao3042_01631	AO1008_08071	0.731575	0.405978	0.518067	0.681729	0.464081	0.903223
Ao3042_01632	AO1008_08072	0	0	0	0	0.0588462	0
Ao3042_01633	AO1008_08073	2.38155	2.06852	2.63118	0.929504	1.52118	2.36371
Ao3042_01634	AO1008_08074	2.14359	0.58019	0.369045	2.37257	2.98661	2.90069
Ao3042_01636	AO1008_08076	1.21749	6.32787	11.2269	1.2801	6.59037	4.67258
Ao3042_01637	AO1008_08077	0	0	0	0	0	0
Ao3042_01638	AO1008_08078	0	0	0	0	0	0
Ao3042_01639	AO1008_08079	23.0294	29.5433	118.306	27.4384	48.052	78.5124
Ao3042_01640	AO1008_08080	105.987	68.914	113.863	138.771	231.053	227.19
Ao3042_01641	AO1008_08081	5.28149	5.39003	2.92327	0.933397	3.11923	2.60823
Ao3042_01642	AO1008_08082	11.6094	8.63732	9.21785	1.5777	1.67321	4.0865
Ao3042_01643	AO1008_08083	0.700151	0	1.99745	1.32139	1.35486	1.04959
Ao3042_01644	AO1008_08084	59.1202	79.0925	111.801	76.3593	67.1343	47.897
Ao3042_01645	AO1008_08085	22.4064	34.3605	30.4099	16.9966	20.6621	17.8645
Ao3042_01646	AO1008_08086	60.6646	38.9658	40.7345	46.33	45.8375	40.2727
Ao3042_01647	AO1008_08087	3.90615	2.41122	2.6307	4.96478	4.93949	6.55923
Ao3042_01648	AO1008_08088	0.415459	0.41098	0.785571	1.81082	0.881154	3.8381
Ao3042_01649	AO1008_08089	0.7746	0.936735	0.93031	0.327769	1.24909	1.25075
Ao3042_01650	AO1008_08090	1.92467	2.66392	1.45529	0.359345	2.12128	4.8239
Ao3042_01651	AO1008_08091	0	0	0	0	0	0
Ao3042_01652	AO1008_08092	1.35247	23.5722	45.595	0.291019	1.84938	3.80416
Ao3042_01654	AO1008_05456	30.2057	22.1384	21.9012	35.859	34.8124	30.2315
Ao3042_01655	AO1008_05455	687.449	1004.92	905.109	1426.86	1068.87	923.45
Ao3042_01656	AO1008_05454	3.63843	2.03809	3.9004	4.39998	6.3656	5.05216
Ao3042_01658	AO1008_05452	1008.17	148.612	665.807	40.8358	379.479	75.0213
Ao3042_01659	AO1008_05451	48.1626	14.1624	41.0461	6.28785	22.2079	12.2602
Ao3042_01660	AO1008_05450	12.6547	31.8384	17.8796	2.88719	11.5732	26.6921
Ao3042_01661	AO1008_05449	0.230323	0.853256	1.52329	0.429751	0.731647	3.98536
Ao3042_01662	AO1008_05448	20.4875	43.9896	53.0135	53.7598	36.537	52.0273
Ao3042_01663	AO1008_05447	17.5476	24.7211	18.962	20.2893	25.9576	35.9651
Ao3042_01664	AO1008_05446	50.983	76.2664	90.1878	48.6771	47.325	112.859
Ao3042_01665	AO1008_05445	28.48	34.8669	34.3378	27.8925	30.5423	29.4725
Ao3042_01666	AO1008_05444	60.8616	31.5893	54.3727	109.409	89.5291	101.782
Ao3042_01667	AO1008_05443	13.1282	16.9951	21.7175	17.2054	15.6429	20.977
Ao3042_01668	AO1008_05442	44.1295	51.6967	74.8234	25.8534	27.3906	17.1664
Ao3042_01669	AO1008_05441	104.614	140.832	151.811	67.7985	89.0879	97.2616
Ao3042_01670	AO1008_05440	87.5287	63.8528	72.8842	102.14	89.8514	99.85
Ao3042_01671	AO1008_05439	41.6947	30.7009	27.8338	59.2822	61.4281	38.8905
Ao3042_01672	AO1008_05438	1592.81	2406.19	3459.62	356.763	606.435	2150.17
Ao3042_01673	AO1008_05437	13.983	7.57938	11.1848	30.0069	27.3684	15.4347
Ao3042_01674	AO1008_05436	389.76	441.366	375.857	906.166	374.999	629.114
Ao3042_01675	AO1008_05435	30.3406	67.0179	99.0932	16.1806	22.6147	37.9584
Ao3042_01676	AO1008_05434	18.0987	15.5002	15.8795	24.2569	27.7284	20.8033
Ao3042_01677	AO1008_05433	21.1556	19.1333	18.1413	24.9465	22.666	18.4722
Ao3042_01678	AO1008_05432	7.11948	6.16863	5.31217	10.7508	5.00474	16.7404
Ao3042_01679	AO1008_05431	12.8911	17.3824	27.17	12.0944	20.1225	37.0688
Ao3042_01680	AO1008_05430	9.22479	12.4898	11.2966	5.44096	10.2604	18.8307
Ao3042_01682	AO1008_05428	42.5656	35.848	20.9046	3.30242	14.0349	29.7185
Ao3042_01683	AO1008_05427	51.1988	48.0191	46.5474	58.3088	58.9124	85.6759
Ao3042_01684	AO1008_05426	53.3797	84.4041	57.8603	27.0164	34.6731	25.5193
Ao3042_01685	AO1008_05425	6.33959	12.3832	5.38545	3.68946	6.99064	10.6412
Ao3042_01686	AO1008_05424	87.2011	61.6584	54.2048	161.167	164.702	158.816
Ao3042_01687	AO1008_05423	12.8657	11.5019	20.9558	34.7597	26.4875	24.2313
Ao3042_01688	AO1008_05422	87.3941	79.7703	86.3096	115.557	111.564	113.018
Ao3042_01689	AO1008_05421	19.0991	13.8559	14.9664	20.1329	22.7853	17.9622
Ao3042_01690	AO1008_05420	16.7772	11.1383	13.7259	35.8769	30.8831	27.743
Ao3042_01691	AO1008_05419	1.16647	0.436547	0	0	1.12434	0.581324
Ao3042_01692	AO1008_05418	100.122	86.3565	124.28	68.8699	71.3045	100.331
Ao3042_01693	AO1008_05417	60.2822	62.6118	51.3973	40.7753	46.4709	55.2417
Ao3042_01694	AO1008_05416	185.295	212.592	175.565	441.446	205.754	366.34
Ao3042_01695	AO1008_05415	27.5769	15.2161	23.7743	14.9129	16.26	13.1431
Ao3042_01696	AO1008_05414	0.9162	0.457546	0	1.43781	1.57138	0.609184
Ao3042_01697	AO1008_05413	10.0134	10.2764	7.3748	11.4398	13.1513	13.396
Ao3042_01698	AO1008_05412	375.359	500.306	306.359	246.877	552.445	531.858
Ao3042_01699	AO1008_05411	58.9903	90.9355	153.264	47.7274	65.7233	87.9329
Ao3042_01700	AO1008_05410	5.24849	11.4632	44.678	3.75148	4.12945	6.26907
Ao3042_01701	AO1008_05409	28.8359	37.1912	43.8453	24.9143	28.1193	32.2663
Ao3042_01702	AO1008_05408	5.8227	3.89258	4.81845	12.8516	9.50539	5.74806
Ao3042_01703	AO1008_05407	33.7356	60.13	73.1836	14.9713	44.9821	60.2505
Ao3042_01704	AO1008_05406	0.558004	0.0871753	0.000265969	0.439068	1.28727	1.4726
Ao3042_01705	AO1008_05405	7.44016	9.91778	7.50303	11.0587	17.7332	25.0717
Ao3042_01708	AO1008_07015	0.501808	0.742259	0.315805	0	0.424223	0
Ao3042_01709	AO1008_07014	707.6	810.355	203.02	13.8953	60.8308	42.1556
Ao3042_01710	AO1008_07013	3.68877	1.71698	0.398204	0.491393	0.133834	0
Ao3042_01712	AO1008_07011	0	0	0	0	0	0
Ao3042_01713	#N/A	0.145013	0	0	0	0	0
Ao3042_01714	AO1008_07009	0.169558	0	0	0.317207	0.432405	0.336134
Ao3042_01715	AO1008_07008	23.3704	2.35807	0.925032	16.4436	20.2209	4.8409
Ao3042_01716	AO1008_07007	0.82813	1.23859	1.57182	1.29774	0.708816	0.274944
Ao3042_01718	AO1008_07005	18.0919	23.2823	12.8327	15.2168	23.809	14.4833
Ao3042_01719	AO1008_07004	0.416831	0.821418	0.393335	1.4874	1.84834	0.754043
Ao3042_01720	AO1008_07003	6.0911	4.99727	5.87976	21.5363	9.88953	8.0782
Ao3042_01721	AO1008_07002	0	0.176838	0	0	0	0
Ao3042_01722	AO1008_07001	123.053	74.2484	37.6253	137.83	308.851	529.471
Ao3042_01723	AO1008_07000	10.075	9.73419	14.3753	2.37795	2.78694	4.31718
Ao3042_01724	AO1008_06999	13.3194	11.004	6.04228	3.06193	3.29088	2.13517
Ao3042_01725	AO1008_06998	69.9813	98.6222	99.8148	76.8872	101.765	61.964
Ao3042_01726	AO1008_06997	4.34638	1.89566	1.19672	6.3451	9.58488	5.46395
Ao3042_01727	AO1008_06996	14.0106	8.27863	12.6948	14.9397	15.2764	16.7081
Ao3042_01728	AO1008_06995	13.4068	12.7182	14.5372	18.0183	20.0201	27.2971
Ao3042_01729	AO1008_06994	170.719	157.396	222.189	209.92	185.423	204.381
Ao3042_01730	AO1008_06993	117.724	92.6507	89.436	169.819	139.718	134.49
Ao3042_01732	AO1008_06991	263.224	223.964	146.564	226.056	252.784	196.052
Ao3042_01733	AO1008_06990	16.0336	34.6756	27.1803	8.55219	14.9929	20.3433
Ao3042_01734	AO1008_06989	4.62618	9.09004	11.5077	1.0077	10.5629	4.26885
Ao3042_01735	AO1008_06988	9.48531	9.60556	8.48883	6.6501	11.3771	9.97229
Ao3042_01737	AO1008_06986	71.7441	60.6934	58.9012	165.615	96.5314	72.159
Ao3042_01738	AO1008_06985	56.4217	95.1317	28.8752	277.376	161.058	184.524
Ao3042_01739	AO1008_06984	30.3048	20.8858	17.4083	17.7055	23.9721	53.8816
Ao3042_01740	AO1008_06983	46.1752	33.9615	15.2298	144.953	59.8187	108.209
Ao3042_01741	AO1008_06982	33.5888	23.2887	8.10551	148.019	63.0665	44.0186
Ao3042_01742	AO1008_06981	210.468	200.404	120.086	336.126	287.688	322.96
Ao3042_01743	AO1008_06980	2.75791	1.89676	0.803904	2.78391	4.06874	4.63514
Ao3042_01744	AO1008_06979	15.6086	16.5402	10.8638	37.4456	26.4115	13.8199
Ao3042_01745	AO1008_06978	4.30377	6.52019	8.31825	2.23937	4.06571	3.26355
Ao3042_01746	AO1008_06977	32.2077	17.9596	21.1617	52.6905	32.123	19.7131
Ao3042_01747	AO1008_06976	59.1093	38.7453	32.3923	28.4526	37.7267	39.7739
Ao3042_01750	AO1008_06973	0	0	0	0	0	0.542469
Ao3042_01751	AO1008_06972	9.29793	16.0698	28.0569	17.8917	7.60484	11.0695
Ao3042_01752	AO1008_06971	14.4875	28.5556	56.7608	5.04116	7.51055	10.7593
Ao3042_01753	AO1008_06970	0.782861	1.76812	2.23597	1.11036	0.506333	3.13548
Ao3042_01754	AO1008_06969	4.03345	3.64996	2.99554	3.71922	4.71127	8.42737
Ao3042_01755	AO1008_06968	14.1916	6.94061	9.2803	6.89132	3.7621	2.43361
Ao3042_01756	AO1008_06967	22.7101	6.74265	5.94629	6.71679	6.5161	9.32893
Ao3042_01757	AO1008_06966	107.752	87.3228	125.339	35.9392	48.0882	63.7063
Ao3042_01758	AO1008_06965	1.81107	1.16441	2.97291	5.57325	3.99283	3.88647
Ao3042_01759	AO1008_06964	6.00279	5.07011	9.4081	3.18779	4.35183	10.6507
Ao3042_01760	AO1008_06963	26.9087	21.7001	36.2932	34.9244	36.8273	62.6819
Ao3042_01761	AO1008_06962	4.15837	5.07138	2.24715	2.63675	4.16046	2.79426
Ao3042_01762	AO1008_06961	4.47819	4.65535	6.55065	2.27482	3.55389	7.91612
Ao3042_01763	AO1008_06960	0.0970073	0.2872	0	0	0	0.191677
Ao3042_01764	AO1008_06959	0.280581	1.04094	0.795844	0.131041	0.892736	0.972104
Ao3042_01765	AO1008_06958	0	0	0.436553	0	0	0
Ao3042_01766	AO1008_06957	0.249556	0.58948	0.564872	0.092835	0.126311	0.934896
Ao3042_01767	AO1008_06956	1.55149	1.96597	1.81284	0.550306	1.59168	4.44775
Ao3042_01768	AO1008_06955	3.10359	3.67676	1.56341	2.79734	5.77956	4.19169
Ao3042_01769	AO1008_06954	3.09739	2.53662	2.91057	1.23907	2.45731	1.40998
Ao3042_01770	AO1008_06953	15.0637	10.0956	22.637	0.851523	5.86168	1.67973
Ao3042_01771	AO1008_06952	16.4144	17.7823	48.5861	0.746457	9.02079	2.86797
Ao3042_01772	AO1008_06951	7.64132	2.26774	1.05082	7.52633	8.4866	7.15103
Ao3042_01773	AO1008_06950	5.0713	2.81654	5.58857	1.18225	2.01247	1.25304
Ao3042_01774	AO1008_06949	3.09315	1.60078	2.77346	3.38451	2.74456	1.22127
Ao3042_01775	AO1008_06948	0.580736	37.1084	161.599	0.180436	0	6.59793
Ao3042_01776	AO1008_06947	11.4488	12.335	21.9044	4.58224	10.5785	23.8761
Ao3042_01777	AO1008_06946	19.8067	23.1784	21.7866	21.4112	29.7936	22.4255
Ao3042_01778	AO1008_06945	56.8812	44.922	42.3556	37.552	39.2461	33.2576
Ao3042_01779	AO1008_06944	649.665	722.316	367.061	327.005	385.086	397.94
Ao3042_01780	AO1008_06943	16.3022	14.6781	14.6062	4.0568	11.0516	6.32982
Ao3042_01781	AO1008_06942	46.611	43.6729	37.4468	7.70718	23.1337	15.3168
Ao3042_01782	AO1008_06941	52.8532	52.8952	49.9457	53.0747	56.1949	77.3283
Ao3042_01783	AO1008_06940	266.674	336.904	491.595	188.993	288.568	392.365
Ao3042_01784	AO1008_06939	9.97541	12.1419	11.9722	5.21301	9.70009	9.66935
Ao3042_01785	AO1008_06938	5.83387	9.69329	9.09261	2.88926	7.65851	7.31391
Ao3042_01786	AO1008_06937	1.29207	1.06543	2.17196	0.536476	0.365502	1.98986
Ao3042_01787	AO1008_06936	10.9162	12.2119	31.3591	5.29889	8.06563	19.491
Ao3042_01788	AO1008_06935	0.27967	0	0	0	0.355925	0.138418
Ao3042_01789	AO1008_06934	9.0237	44.0304	12.1142	2.19779	19.9607	64.8295
Ao3042_01790	AO1008_06933	3.53324	3.98202	2.22361	0.783651	1.49353	2.32575
Ao3042_01791	AO1008_06932	12.6716	16.6369	22.7482	19.3734	21.9608	22.5614
Ao3042_01792	AO1008_06931	20.8997	10.0849	9.95241	13.7173	20.7507	5.83364
Ao3042_01793	AO1008_06930	9.43142	4.94479	10.9368	3.10471	4.24862	5.75317
Ao3042_01794	AO1008_06929	87.0136	108.746	104.198	65.859	76.2839	63.8756
Ao3042_01795	AO1008_06928	20.8204	9.82476	14.6824	18.4111	20.132	20.6346
Ao3042_01796	AO1008_06927	5.56534	7.14695	9.95766	3.51415	8.42849	2.97924
Ao3042_01797	AO1008_06926	0	0	0	0	0	0
Ao3042_01798	AO1008_06925	1.01386	0.333816	0.638568	0.420335	0.286235	0.668239
Ao3042_01799	AO1008_06924	28.0522	34.2032	36.0336	26.9721	31.0278	30.7476
Ao3042_01800	AO1008_06923	57.3637	68.556	45.5638	73.2325	69.3921	55.6424
Ao3042_01801	AO1008_06922	28.5272	23.0385	32.1294	15.7571	16.9122	16.5897
Ao3042_01802	AO1008_06921	0	0	0	0.208173	0	0
Ao3042_01803	AO1008_06920	11.1632	5.09403	4.392	15.5184	13.8103	8.08626
Ao3042_01804	AO1008_10609	10.1407	11.0645	12.5667	14.6443	10.5257	13.9042
Ao3042_01805	AO1008_10608	6.14709	3.82431	6.5935	7.82856	11.3096	11.9368
Ao3042_01806	AO1008_10607	25.6893	14.2245	15.013	23.9632	22.2599	18.363
Ao3042_01807	AO1008_10606	283.749	47.4543	40.3902	254.669	405.655	146.126
Ao3042_01809	AO1008_09909	0.142613	3.17494	114.349	0	0	3.67083
Ao3042_01810	AO1008_09910	2.90272	1.43156	0.498271	16.2269	7.25225	5.03821
Ao3042_01811	AO1008_09911	1.11247	0.236092	0.902009	2.37727	0.810015	1.10215
Ao3042_01812	AO1008_09912	2.50234	0	0.594292	3.24091	1.61019	2.80863
Ao3042_01813	AO1008_09913	0	0	0	0	0	0
Ao3042_01814	AO1008_09914	18.622	50.0317	51.5829	1.74205	7.21729	11.8818
Ao3042_01815	AO1008_09915	0	0	1.8058	0	0	0
Ao3042_01816	AO1008_09916	0.2255	0	0.213042	0	0	1.22618
Ao3042_01817	AO1008_09917	0	0.27031	0	0	0	0
Ao3042_01818	AO1008_09918	0.127425	2.07853	0.963476	1.1895	1.13428	2.26914
Ao3042_01819	AO1008_09919	0.479466	0.472707	0.754283	0.0744248	1.0131	1.10442
Ao3042_01820	AO1008_09920	1.16814	1.19665	4.24199	2.17694	0.341976	0.354983
Ao3042_01821	AO1008_09921	0.563024	2.22212	3.72151	0.262362	0.238143	0.463467
Ao3042_01823	AO1008_09923	3.19399	9.311	7.32893	4.29221	4.67114	7.24229
Ao3042_01824	AO1008_09765	44.1089	50.8117	47.1169	49.1012	50.5793	59.2698
Ao3042_01825	AO1008_09764	15.7057	5.67712	55.6408	0.369687	1.84669	9.01117
Ao3042_01826	AO1008_09763	6.75476	48.4158	41.3731	0	1.79893	3.98465
Ao3042_01828	AO1008_09761	1.45013	2.36781	1.09699	0.948382	0.553842	0.574311
Ao3042_01829	AO1008_09760	0.269935	0.854415	0.872585	0.21506	0.780153	0.151988
Ao3042_01830	AO1008_09759	0.16223	0	0	0	0	0
Ao3042_01831	AO1008_09758	0.125577	0.185528	1.42172	0.0584295	0	0.495488
Ao3042_01832	AO1008_09757	0.105825	0.626929	3.39863	0	0	0.104592
Ao3042_01833	AO1008_09756	122.936	93.303	145.071	8.58394	12.0682	12.5622
Ao3042_01834	#N/A	0	0	31.9274	0	0	4.5885
Ao3042_01835	AO1008_09754	9.60526	0.78359	0.500539	0.246802	0.873119	0.941837
Ao3042_01836	AO1008_09753	0	0	0	0	0	0
Ao3042_01837	AO1008_09752	0	0	0	0	0	0
Ao3042_01838	AO1008_09751	0.16693	3.22531	0.94766	0	0.212815	0
Ao3042_01839	AO1008_09750	0.414096	0.616876	1.56895	0.582071	0	0
Ao3042_01840	AO1008_09749	0	0	0	0	0	0
Ao3042_01841	AO1008_09748	0	0.185638	0.946616	0	0	0.247705
Ao3042_01842	AO1008_00577	2.8305	2.54526	1.62545	3.77899	3.19466	4.18788
Ao3042_01843	AO1008_00576	22.6935	31.4953	33.643	24.8666	28.7517	48.6729
Ao3042_01844	AO1008_00575	0	0	0.990058	0	0.222397	0
Ao3042_01845	AO1008_00574	0.143563	0	1.35747	0.134119	0	0
Ao3042_01846	AO1008_02452	30.1389	42.8845	30.3662	25.2894	20.1011	32.3913
Ao3042_01847	AO1008_02451	0.317067	0	0	0	0	0.157061
Ao3042_01848	AO1008_02450	9.35066	10.7316	8.39534	5.18784	8.41408	35.7176
Ao3042_01849	AO1008_02449	0.374419	9.01124	1.42519	0	0	0
Ao3042_01850	AO1008_02448	0.543626	1.07817	0	0	0	0
Ao3042_01851	AO1008_02447	0	0	0	0	0.361482	0.841209
Ao3042_01852	AO1008_02446	0.810463	3.25992	2.62544	0.648112	0.294244	0.457931
Ao3042_01853	AO1008_02445	0	0	0	0	0	0
Ao3042_01854	AO1008_02444	0	0	0	0	0	0
Ao3042_01855	AO1008_02443	1.65029	1.05536	1.34092	0.442467	2.41516	1.6407
Ao3042_01856	AO1008_02442	0	20.911	113.157	0	1.46543	5.68328
Ao3042_01857	AO1008_02441	44.8061	58.0336	31.2327	3.23539	9.32965	1.61372
Ao3042_01859	AO1008_02439	100.622	16.9708	3.78404	42.994	36.9328	5.377
Ao3042_01860	AO1008_02438	2.02126	0.692801	0.29413	1.88938	2.57497	2.31024
Ao3042_01861	AO1008_02437	15.1933	15.4812	28.4734	28.1251	34.9553	66.6728
Ao3042_01862	AO1008_02436	1.56267	3.75914	7.00973	0.18208	1.36358	2.99129
Ao3042_01864	AO1008_02434	0.142613	0.423326	0.80907	0	0.36306	0.9883
Ao3042_01865	AO1008_02433	0.785408	0	1.85932	1.47124	0	1.75376
Ao3042_01866	AO1008_02432	4.56002	9.89677	4.67704	7.29395	10.1887	8.10569
Ao3042_01867	AO1008_02431	0.656931	2.93789	2.9048	0	0	1.30523
Ao3042_01868	AO1008_02430	19.7288	53.0617	44.8254	15.7499	22.0651	47.5711
Ao3042_01869	AO1008_02429	17.8364	49.0632	59.694	1.16054	6.12141	13.5314
Ao3042_01870	AO1008_02428	0	0	0.612691	0	0	0
Ao3042_01871	AO1008_02427	0.369196	0.272707	1.27714	0.114515	0.155837	0.606939
Ao3042_01872	AO1008_02426	0.372107	0.963735	1.40544	0	0	0.551336
Ao3042_01873	AO1008_02425	0.996907	2.0782	0.755266	4.48247	4.07549	21.1748
Ao3042_01874	AO1008_02424	0.276043	0.825724	1.57182	2.33593	0.708816	4.949
Ao3042_01875	AO1008_02423	0.168909	0.249857	0	0.550716	0.642607	2.25152
Ao3042_01876	AO1008_02422	13.36	32.6792	25.9232	28.7896	40.3229	39.2239
Ao3042_01877	AO1008_02421	2.52607	4.8809	3.30006	2.59205	4.59403	10.4153
Ao3042_01878	AO1008_02420	0.735356	0.466736	0.198453	0	0.133396	0.415291
Ao3042_01879	AO1008_02419	12.1093	33.3159	21.2665	2.21241	5.3429	12.028
Ao3042_01880	AO1008_02418	240.783	115.497	74.2671	347.483	364.201	320.273
Ao3042_01881	AO1008_02417	354.188	415.748	325.069	116.673	247.977	344.218
Ao3042_01882	AO1008_02416	93.4078	67.0258	63.135	21.3546	42.1037	52.1889
Ao3042_01883	AO1008_02415	65.3661	59.35	69.1331	7.89883	27.4442	46.0443
Ao3042_01884	AO1008_02414	275.273	247.207	134.438	194.961	277.079	108.611
Ao3042_01885	AO1008_02413	1.38912	2.4934	4.7461	1.30622	1.42694	3.04414
Ao3042_01886	AO1008_02412	7.22943	14.5037	9.25619	2.86394	5.79536	9.68119
Ao3042_01887	AO1008_02411	0.134813	0	0.127206	0	0	0.66505
Ao3042_01888	AO1008_02410	8.61371	16.4475	21.8225	11.6453	23.3158	34.8892
Ao3042_01889	AO1008_02409	5.42452	9.05962	9.35751	3.16647	5.15868	5.55308
Ao3042_01890	AO1008_02408	0	0	0.143901	0	0	0
Ao3042_01891	AO1008_02407	1.55331	1.46695	2.40325	0.395717	1.79728	1.81725
Ao3042_01892	AO1008_02406	0	0	0	0	0	0
Ao3042_01893	AO1008_02405	0.660576	0	0.499533	0	1.17638	1.17658
Ao3042_01894	AO1008_02404	0.0938374	0	0	0	0	0
Ao3042_01895	AO1008_02403	0.184837	0	0.349946	0	0	0
Ao3042_01896	AO1008_02402	6.55127	6.88632	4.39449	9.71718	7.21565	9.02279
Ao3042_01897	AO1008_02401	0	0	0	0.713879	0	0
Ao3042_01898	AO1008_02400	76.6855	84.9599	27.5945	18.7819	28.4396	33.1802
Ao3042_01899	AO1008_02399	43.1205	49.3272	41.5792	57.0238	67.7287	52.1759
Ao3042_01900	AO1008_00603	30.5985	49.1708	36.362	10.5587	26.3143	22.843
Ao3042_01901	AO1008_00602	4.25322	4.11978	3.16114	4.78246	6.57734	3.23293
Ao3042_01902	AO1008_00601	14.6854	9.40123	7.14435	16.9873	15.159	7.24726
Ao3042_01903	AO1008_00600	3.51816	18.001	52.3662	3.47969	5.28023	3.89876
Ao3042_01904	AO1008_00599	7.6241	10.3177	11.1267	4.87101	6.46607	5.95641
Ao3042_01905	AO1008_00598	1.93826	1.27336	0.948433	0.267331	1.36445	7.155
Ao3042_01906	AO1008_00597	0	0	0	0	0	0
Ao3042_01907	AO1008_00596	0	0	0	0	0	0
Ao3042_01908	AO1008_00595	57.0527	78.2862	63.8312	80.2419	98.1589	176.185
Ao3042_01909	AO1008_00594	2.00576	1.32277	1.61992	2.29798	4.01304	5.73833
Ao3042_01910	AO1008_00593	15.118	24.0912	18.4395	15.617	15.5154	12.645
Ao3042_01911	AO1008_00592	0	0	0	0.116522	0	0
Ao3042_01912	AO1008_00591	0	0	0	0	0	0
Ao3042_01913	AO1008_00590	0	0	0	0	0	0
Ao3042_01914	AO1008_00589	6.74243	10.5789	10.4546	10.8829	16.0966	18.0975
Ao3042_01915	AO1008_00588	8.62213	11.3876	7.87479	6.35973	11.4087	11.598
Ao3042_01916	AO1008_00587	10.3308	6.30472	7.22289	9.86347	11.8903	8.41704
Ao3042_01917	AO1008_00586	164.572	203.804	200.972	315.513	233.998	235.811
Ao3042_01918	AO1008_00585	31.9952	36.2981	36.7797	32.0361	24.4445	25.1057
Ao3042_01919	AO1008_00584	348.355	244.701	204.716	6.01957	16.434	18.876
Ao3042_01920	AO1008_00583	1.42733	2.60808	9.66968	2.11172	10.4342	27.5228
Ao3042_01921	AO1008_00582	2.04117	1.96964	2.34608	1.65378	3.71497	7.53742
Ao3042_01922	AO1008_00581	0.163408	0.144603	0.123233	0	0	0.289746
Ao3042_01923	AO1008_00580	0.425068	0.697156	3.29599	0.043918	0.298761	0.838006
Ao3042_01924	AO1008_00579	0	3.30295	4.13499	0	0	0.72916
Ao3042_01925	AO1008_00578	2.05706	1.90662	2.9164	2.04037	3.76057	2.67118
Ao3042_01926	AO1008_07472	19.3011	19.275	12.5545	21.1414	32.4584	31.8498
Ao3042_01927	AO1008_07471	27.4986	17.0038	30.8739	36.4728	27.3383	33.5682
Ao3042_01928	AO1008_07470	36.2654	31.8164	37.2502	30.7517	33.6983	40.4719
Ao3042_01929	AO1008_07469	3.47665	6.45601	2.09986	6.16007	4.15194	4.56257
Ao3042_01930	AO1008_07468	11.1475	3.991	6.85519	16.7692	10.832	5.85018
Ao3042_01931	AO1008_07467	18.1513	18.3734	17.8478	15.7612	14.4743	16.4077
Ao3042_01932	AO1008_07466	16.8568	17.4729	15.107	29.2579	36.2973	12.8834
Ao3042_01933	AO1008_07465	13.8692	7.53402	14.8888	19.9058	15.4523	16.9573
Ao3042_01934	AO1008_07464	2.74761	5.22898	22.9415	2.28819	4.10439	5.67435
Ao3042_01935	AO1008_07463	192.302	186.888	229.672	163.671	157.543	148.926
Ao3042_01936	AO1008_07462	134.628	102.847	93.8561	96.6386	128.868	109.046
Ao3042_01937	AO1008_07461	61.9895	57.477	62.6188	62.3959	65.0736	97.1918
Ao3042_01938	AO1008_07460	40.3989	26.4356	22.6139	80.5314	43.5689	28.8383
Ao3042_01939	AO1008_07459	1119.59	1035.65	881.002	1847.13	1276.8	1041.78
Ao3042_01940	AO1008_07458	22.3905	44.5338	51.0855	79.0125	60.6512	48.2618
Ao3042_01941	AO1008_07457	14.1335	14.6808	19.8996	20.8903	24.5273	24.7823
Ao3042_01942	AO1008_07456	24.63	29.0239	43.6135	14.6097	25.4901	31.3492
Ao3042_01943	AO1008_07455	56.7776	29.8991	45.2617	70.0972	60.3652	38.5315
Ao3042_01944	AO1008_07454	16.5176	15.661	20.3354	52.3187	35.7736	44.0369
Ao3042_01945	AO1008_07453	13.2502	18.3965	37.2708	21.7798	18.9368	23.3593
Ao3042_01946	AO1008_07452	0.401135	0	0	0.626867	0	0
Ao3042_01947	AO1008_07451	30.5338	20.7121	18.3016	15.9347	20.8405	16.7092
Ao3042_01948	AO1008_07450	24.4293	20.0263	15.4112	27.797	21.0471	14.0213
Ao3042_01949	AO1008_07449	29.5388	25.7048	27.4832	46.8244	29.5521	31.4755
Ao3042_01950	AO1008_07448	1.3961	0.344057	0.878463	0.722278	1.17979	0.612472
Ao3042_01951	AO1008_07447	0	0.343527	0	0	0	0
Ao3042_01952	AO1008_07446	20.6404	21.6842	24.8239	22.3611	27.3793	28.9625
Ao3042_01953	AO1008_07445	13.0353	9.52436	14.8777	16.3722	19.3074	23.0391
Ao3042_01954	AO1008_07444	28.4412	23.4242	23.063	40.1199	35.4202	41.7094
Ao3042_01955	AO1008_07443	48.9921	66.3639	82.0899	67.6609	58.7591	110.247
Ao3042_01956	AO1008_07442	61.473	65.3988	52.7852	47.6443	57.0968	56.3874
Ao3042_01957	AO1008_07441	8.2021	7.39262	7.89654	15.5466	13.1474	13.1769
Ao3042_01958	AO1008_07440	9.82982	8.45594	6.92608	16.847	11.7389	8.16192
Ao3042_01959	AO1008_07439	150.174	158.315	167.699	520.511	357.288	374.815
Ao3042_01960	AO1008_07438	76.0473	47.2693	62.024	128.311	92.6666	93.8212
Ao3042_01961	AO1008_07437	3.16513	0.966731	8.49418	0	8.31913	4.48653
Ao3042_01962	AO1008_07436	116.594	146.089	137.299	189.378	176.085	181.087
Ao3042_01963	AO1008_07435	33.0332	39.2192	41.7918	23.5646	31.8295	44.0403
Ao3042_01964	AO1008_07434	13.6006	12.6247	11.6946	17.9132	15.7502	9.79766
Ao3042_01965	AO1008_07433	19.5799	29.1972	30.1778	58.3448	57.1023	45.6243
Ao3042_01966	AO1008_07432	27.4887	24.5568	26.7036	26.5433	36.2464	35.3086
Ao3042_01967	AO1008_07431	9.11352	8.46978	17.4231	13.871	14.902	14.1678
Ao3042_01968	AO1008_07430	28.3003	12.7897	13.9886	42.1772	48.3641	27.8525
Ao3042_01969	AO1008_07429	19.0555	6.67277	9.37817	13.757	17.7619	33.6073
Ao3042_01970	AO1008_07428	35.4707	23.8487	27.0645	30.6025	37.7686	39.2468
Ao3042_01971	AO1008_07427	27.9664	20.2183	25.812	31.1373	28.0415	29.5261
Ao3042_01972	AO1008_07426	2.26728	1.08078	2.62409	6.73505	1.05518	1.03877
Ao3042_01973	AO1008_07425	21.9423	17.9087	31.6053	27.401	27.5114	23.4276
Ao3042_01974	AO1008_07424	107.001	139.949	132.632	262.462	231.987	349.581
Ao3042_01975	AO1008_07423	15.4369	12.2113	16.6892	18.9877	19.1039	28.6233
Ao3042_01976	AO1008_07422	7.28279	6.86826	6.54502	4.6487	9.4904	13.3455
Ao3042_01977	AO1008_07421	13.8993	21.5882	26.7267	16.4079	19.7083	26.2887
Ao3042_01978	AO1008_07420	0	0	0	0.644787	0	0
Ao3042_01979	AO1008_07419	9.754	13.7443	10.6964	8.76502	16.6838	19.2934
Ao3042_01980	AO1008_07418	5.83004	16.9082	21.2028	1.83943	6.01137	11.8356
Ao3042_01981	AO1008_07417	10.0305	15.3099	17.6546	6.20336	7.58987	9.17292
Ao3042_01982	AO1008_07416	4.2173	4.67915	6.66071	5.89595	5.46837	8.41658
Ao3042_01983	AO1008_07415	64.1436	75.7062	93.5348	81.1277	71.1728	74.904
Ao3042_01984	AO1008_07414	24.9344	45.4931	48.9518	16.1607	21.1691	33.4121
Ao3042_01985	AO1008_07413	404.67	209.673	134.85	269.646	324.466	321.977
Ao3042_01986	AO1008_07412	13.0802	6.43112	8.41485	21.3119	19.1385	13.7992
Ao3042_01987	AO1008_07411	18.3722	17.0846	17.7635	18.0152	18.5489	20.5983
Ao3042_01988	AO1008_07410	27.7073	27.7715	27.2884	46.9806	35.5311	29.1763
Ao3042_01989	AO1008_07409	33.2685	21.6029	22.2464	41.2212	49.4762	53.4923
Ao3042_01990	AO1008_07408	106.5	35.6797	45.124	127.541	143.654	115.892
Ao3042_01991	AO1008_07407	27.7293	43.3023	27.5499	28.1475	32.4093	35.2183
Ao3042_01992	AO1008_07406	29.1715	34.4763	33.4044	50.8946	44.6975	58.911
Ao3042_01993	AO1008_07405	14.1202	7.14501	8.91501	20.0962	15.4531	11.1506
Ao3042_01994	AO1008_07404	23.149	22.5889	25.8647	28.4439	29.6897	44.4495
Ao3042_01995	AO1008_07403	15.2502	9.70235	10.5403	11.1155	10.3733	7.70031
Ao3042_01996	AO1008_07402	18.1817	11.8394	17.2962	23.8542	19.1168	18.0316
Ao3042_01997	AO1008_07401	3.4705	3.21908	3.65675	5.13127	5.40514	3.66269
Ao3042_01999	AO1008_07399	31.0706	17.872	21.7549	70.5428	52.4549	41.2587
Ao3042_02000	AO1008_07398	18.0407	10.1045	19.3543	22.9165	18.6236	30.015
Ao3042_02002	AO1008_07396	22.0297	21.8037	18.2076	26.9627	28.2443	12.4567
Ao3042_02003	AO1008_07395	69.665	54.9827	57.9459	66.8419	61.8822	46.9124
Ao3042_02004	AO1008_07394	13.8643	10.3221	11.3031	8.7934	11.2734	8.67916
Ao3042_02005	AO1008_07393	13.2158	31.1341	36.4644	12.4056	15.9845	21.586
Ao3042_02006	AO1008_07392	10.9544	10.3567	10.0992	19.5741	16.4697	16.0724
Ao3042_02007	AO1008_07391	26.7853	32.6908	41.8995	39.3672	36.1942	42.5713
Ao3042_02008	AO1008_07390	28.5758	21.2192	20.6339	30.8733	32.6813	27.2388
Ao3042_02009	AO1008_10582	14.5387	37.004	31.8566	12.6104	16.5343	49.8282
Ao3042_02010	AO1008_10581	13.8938	12.0752	14.267	13.4324	16.914	13.5447
Ao3042_02012	AO1008_10579	18.1327	24.5937	30.2439	17.2763	20.6108	16.9701
Ao3042_02013	AO1008_10578	60.8398	79.023	86.2101	52.7997	62.665	69.1758
Ao3042_02014	AO1008_10577	194.803	52.5425	5.61425	72.8136	275.713	37.5469
Ao3042_02015	AO1008_10236	16.0342	13.15	12.9106	20.0981	16.7545	13.1577
Ao3042_02016	AO1008_10235	87.2981	81.0866	73.0296	90.1743	81.796	50.6378
Ao3042_02017	AO1008_10234	9.0398	5.20651	6.58705	17.8069	15.4352	6.38699
Ao3042_02018	AO1008_10233	29.701	23.8897	26.3335	26.3476	26.2996	22.454
Ao3042_02019	AO1008_10232	35.824	38.28	72.5787	42.1621	63.3734	45.4227
Ao3042_02020	AO1008_10231	107.514	226.319	140.386	426.696	220.212	221.568
Ao3042_02021	AO1008_10230	271.63	362.379	576.814	62.3295	106.992	189.061
Ao3042_02022	AO1008_10229	9.20856	7.3558	13.877	17.8395	14.9643	15.3181
Ao3042_02023	AO1008_10228	53.9168	47.7226	51.2219	215.295	193.202	132.851
Ao3042_02024	AO1008_10227	87.2314	55.5567	53.8611	208.878	104.944	62.122
Ao3042_02025	AO1008_10226	48.1905	40.9496	54.947	25.3967	31.1662	32.5094
Ao3042_02026	AO1008_10225	15.9249	13.1325	13.8979	16.4439	20.0883	17.8271
Ao3042_02027	AO1008_10224	193.237	288.074	302.878	157.4	201.31	215.877
Ao3042_02028	AO1008_10223	25.2907	289.947	87.2116	5.25685	49.0558	137.032
Ao3042_02029	AO1008_10222	40.0859	75.5384	130.413	10.5612	36.61	68.1721
Ao3042_02031	AO1008_10220	66.9053	10.8484	19.9352	33.5595	63.5678	9.39027
Ao3042_02032	AO1008_10219	55.0281	42.2257	46.7864	45.4652	39.5348	70.7664
Ao3042_02033	AO1008_10218	83.0656	72.4163	65.7003	37.064	50.9138	77.3135
Ao3042_02034	AO1008_10217	277.034	140.568	101.719	622.123	666.672	383.638
Ao3042_02035	AO1008_10216	1.06277	0.393114	0.334463	0.742664	1.3481	1.74927
Ao3042_02036	AO1008_10215	18.2405	20.1095	27.874	5.79822	12.6967	14.1876
Ao3042_02037	AO1008_10214	56.6984	59.5361	90.8565	39.4271	60.8293	60.6296
Ao3042_02038	AO1008_10213	44.8608	64.2474	92.5201	68.9266	75.3503	66.6634
Ao3042_02039	AO1008_10212	783.23	595.455	871.154	790.845	996.751	434.242
Ao3042_02040	AO1008_10211	27.1858	18.001	24.169	20.7787	21.7979	18.6508
Ao3042_02041	AO1008_10210	158.889	121.194	185.037	157.183	233.07	153.938
Ao3042_02042	AO1008_10209	349.753	53.5861	90.5453	177.592	434.544	112.561
Ao3042_02043	AO1008_10208	101.256	74.7181	85.3073	73.6225	90.7379	77.0977
Ao3042_02044	AO1008_10207	50.9488	45.2563	36.6524	89.5353	44.1871	44.8572
Ao3042_02045	AO1008_10206	12.8445	10.8941	11.4791	35.0203	22.5887	13.7824
Ao3042_02046	AO1008_10205	125.928	69.1612	59.9133	143.103	90.128	49.881
Ao3042_02047	AO1008_10204	94.7877	44.5136	70.1239	27.7961	29.0616	35.469
Ao3042_02048	AO1008_10203	43.7479	33.0736	31.4438	48.8115	41.1534	52.5027
Ao3042_02049	AO1008_10202	51.9799	60.8695	69.1746	40.4928	59.2085	70.0525
Ao3042_02050	AO1008_10201	77.5475	47.2482	51.7766	86.5742	69.3397	65.9084
Ao3042_02051	AO1008_10200	56.5327	52.6657	47.4894	44.788	60.3552	67.283
Ao3042_02052	AO1008_10199	110.155	122.16	86.3995	84.0193	114.026	149.767
Ao3042_02053	AO1008_10198	26.875	20.1568	26.0163	53.706	57.4765	63.4257
Ao3042_02054	AO1008_10197	22.1236	10.7452	16.8707	31.8101	29.2541	25.7478
Ao3042_02055	AO1008_10196	31.9381	29.603	29.9173	31.759	37.0487	35.8591
Ao3042_02056	AO1008_10195	1.6693	0.744301	1.26355	0	0.638445	0.661768
Ao3042_02057	AO1008_10194	4.09958	4.6155	9.89086	1.58461	2.87883	6.71723
Ao3042_02058	AO1008_10193	0.549024	1.40002	1.12974	0.0464175	0.0631555	0.442846
Ao3042_02059	AO1008_10192	9.92161	14.8581	14.6455	16.0902	26.7429	20.5057
Ao3042_02061	AO1008_10190	0.726497	0.307387	0.196055	0.193543	0.79067	1.12823
Ao3042_02062	AO1008_10189	1.49808	2.96154	6.84301	0.582611	1.11108	2.9638
Ao3042_02063	AO1008_10188	3.32438	5.23461	6.41087	5.8536	5.03672	5.49152
Ao3042_02064	AO1008_10187	0	1.63778	0.832782	0.412053	0.562144	1.74629
Ao3042_02065	AO1008_10186	0	2.24086	0	0	0	0.741926
Ao3042_02066	AO1008_10185	100.393	177.421	169.065	36.6326	92.9632	131.202
Ao3042_02067	AO1008_10184	54.9922	32.4311	35.3346	100.902	68.4832	41.0641
Ao3042_02068	AO1008_10183	20.8823	15.8729	19.2448	39.358	26.8921	19.2414
Ao3042_02069	AO1008_10182	50.6106	53.8325	46.8452	150.382	94.7873	51.2823
Ao3042_02070	AO1008_10181	50.9848	23.5721	27.0632	25.1386	46.6121	34.4935
Ao3042_02071	AO1008_10180	7.97545	8.43419	12.0772	6.63373	12.4354	6.85365
Ao3042_02072	AO1008_10179	53.0256	46.3262	65.1246	50.903	79.123	57.365
Ao3042_02073	AO1008_10178	0	29.5807	10.378	0	0	30.5394
Ao3042_02074	AO1008_10177	50.9817	37.1797	33.4083	314.575	198.097	232.445
Ao3042_02075	AO1008_10176	69.1878	135.267	421.188	4.79591	28.4672	43.4223
Ao3042_02076	AO1008_10175	9.18038	2.45926	2.4928	0.927174	2.95656	1.63669
Ao3042_02077	AO1008_10174	0	0	0	0.180038	0.491021	0.763071
Ao3042_02078	AO1008_10173	55.4147	70.1595	68.4426	52.5473	66.5981	91.9333
Ao3042_02079	AO1008_10172	38.6996	42.9616	50.2967	60.8358	44.2533	36.5653
Ao3042_02080	AO1008_10171	72.1887	50.1478	56.6529	156.243	95.3757	67.2136
Ao3042_02081	AO1008_10170	9.62087	13.2738	16.4122	13.2385	16.4828	13.8628
Ao3042_02082	AO1008_10169	23.8926	24.8169	24.9759	33.7235	38.5237	39.925
Ao3042_02083	AO1008_10168	0.311356	2.3054	4.50927	0.580629	0.922449	2.25646
Ao3042_02084	AO1008_10167	0.858251	16.1889	166.044	1.21953	7.23396	4.73464
Ao3042_02085	AO1008_10166	0	1.10258	8.2373	0	0.135054	0.315332
Ao3042_02086	AO1008_10165	1.06194	0.263204	0.335015	0.165614	0.903143	0
Ao3042_02087	AO1008_10164	30.5131	14.6217	6.8922	2.14336	4.46611	3.07319
Ao3042_02088	AO1008_10163	0.0800525	1.90291	4.85168	0	0.408049	0.215911
Ao3042_02089	AO1008_10162	1.66439	4.95913	6.30627	0.19497	2.65939	0.206579
Ao3042_02090	AO1008_10161	7.39265	7.87662	7.81463	12.2498	14.2563	13.8321
Ao3042_02091	AO1008_10160	1.05335	2.60178	3.09641	0.436797	0.892397	1.50453
Ao3042_02092	AO1008_10159	10.0281	11.9236	10.0819	19.7078	9.47847	31.4605
Ao3042_02093	AO1008_10158	55.654	27.4786	31.9917	99.1792	104.244	72.9207
Ao3042_02094	AO1008_10157	24.3602	27.9275	80.6977	41.608	35.604	36.1468
Ao3042_02095	AO1008_10156	3.725	6.21029	9.45884	12.3811	8.28369	8.97816
Ao3042_02096	AO1008_10155	29.9678	19.3985	25.6425	4.74698	14.2605	8.56942
Ao3042_02097	AO1008_10154	10.025	4.78575	6.31391	0.727299	4.66958	0.440475
Ao3042_02098	AO1008_10153	0.733058	0.545268	0	1.20077	0.233885	0.727062
Ao3042_02099	AO1008_10152	0.738243	2.20447	0.933367	0.924155	0.630656	0.244767
Ao3042_02100	AO1008_10151	0.649292	0.192592	0	0	0	0
[truncated: 9,400 more rows]

## Sheet: Table S2
Table S2. The identified spots related to amino acid metabolism of the proteome analysis of A. oryzae 3.042 and 100-8 applying 2D PAGE and MALDI-TOF MS
Spot no.		Accession number	Putative function and protein name		ratio1)	Exp. pI	Exp. MW	Theor. pI	Theor. MW	Number of mass2)	Number of mass2)	PMF2)	PMF2)
in Fig.1							[kDa]		[kDa]	values searched	values matched	Sequence Cov.	Score
			Peptidase
152	1	AO090103000443		5-oxo-L-prolinase,5-oxoprolinase (ATP-hydrolysing)	up	6.06305	55.3112	5.62	139.522	29	17	0.15	129
153	1	AO090103000443		5-oxo-L-prolinase,5-oxoprolinase (ATP-hydrolysing)	up	6.10975	49.8174	5.62	139.522	31	14	0.14	95
154	1	AO090103000443		5-oxo-L-prolinase,5-oxoprolinase (ATP-hydrolysing)	up	5.92044	66.7298	5.62	139.522	18	13	0.14	132
176	1	AO090701000720		Xaa-Pro aminopeptidase	up	5.28278	57.422	5.47	67.077	12	6	0.09	63
172	1	AO090102000639		puromycin-sensitive aminopeptidase and related aminopeptidases	up	6.01811	74.5882	5.45	99.2161	31	23	0.3	256
109	1	AO090005001447		aminopeptidase I zinc metalloprotease (M18)	up	5.90871	51.7967	5.94	54.1867	27	16	0.37	183
110	1	AO090005001447		aminopeptidase I zinc metalloprotease (M18)	2.09957	6.40366	61.3464	5.94	54.1867	12	9	0.25	129
175	1	AO090120000110		aminopeptidase I zinc metalloprotease (M18)	6.36953	5.33516	26.7922	5.42	22.7886	21	10	0.63	153
173	1	AO090023000645		puromycin-sensitive aminopeptidase and related aminopeptidases	down	5.64838	86.9726	5.29	98.4566	23	18	0.24	202
			Amino acid metabolism
106	1	AO090003000208		4-hydroxyphenylpyruvate dioxygenase	up	6.6623	18.7583	5.62	45.5409	21	11	0.31	136
107	1	AO090003000208		4-hydroxyphenylpyruvate dioxygenase	up	6.75836	18.5101	5.62	45.5409	27	10	0.25	102
	2	AO090001000710		hexokinase Kxk, putative				5.17	54.6258	27	7	0.15	57
108	1	AO090003000208		4-hydroxyphenylpyruvate dioxygenase	down	5.29269	41.572	5.62	45.5409	21	13	0.4	175
123	1	AO090011000351		glycine dehydrogenase (decarboxylating)	up	5.92459	68.714	6.39	116.943	10	6	0.07	55
124	1	AO090005001302		glycine/serine hydroxymethyltransferase	up	5.96844	28.7814	7.24	52.2297	12	7	0.19	93
125	1	AO090005001302		glycine/serine hydroxymethyltransferase	up	6.38207	26.8293	7.24	52.2297	16	8	0.22	99
156	1	AO090009000314		methylmalonate semialdehyde dehydrogenase	up	5.39358	49.079	6.2	60.3496	21	12	0.26	140
158	1	AO090003000661		thiamine pyrophosphate-requiring enzyme	up	5.94337	60.9211	5.58	63.4571	20	15	0.38	209
159	1	AO090003000661		thiamine pyrophosphate-requiring enzyme	up	6.33798	48.5379	5.58	63.4571	30	16	0.43	189
160	1	AO090003000661		thiamine pyrophosphate-requiring enzyme	4.16728	5.98372	40.6209	5.58	63.4571	23	11	0.29	125
	2	AO090009000281		tubulin beta subunit; K07375 tubulin beta				4.83	48.9276	23	7	0.2	66
	3	AO090038000317		tubulin beta, putative; K07375 tubulin beta				4.93	50.5623	23	7	0.19	66
161	1	AO090003000661		thiamine pyrophosphate-requiring enzyme	2.59777	5.64908	27.2819	5.58	63.4571	19	10	0.23	103
162	1	AO090003000661		thiamine pyrophosphate-requiring enzyme	3.19668	6.15458	58.5372	5.58	63.4571	20	18	0.48	279
133	1	AO090020000015		metalloexopeptidases	2.09897	5.26833	32.0741	5.7	52.4375	17	10	0.26	133
			Amino acid biosynthesis
			Phenylalanine, tyrosine and tryptophan
155	1	AO090012000502		pentafunctional AROM polypeptide	up	6.79003	85.0508	6.48	174.517	15	11	0.09	103
104	1	AO090005000086		3-deoxy-D-arabino-heptulosonate 7-phosphate (DAHP) synthase	2.86338	6.76296	45.2524	6.28	39.6964	30	12	0.47	131
	2	AO090023000923		Glutamate/Leucine/Phenylalanine/Valine dehydrogenase, putative				5.68	49.531	30	7	0.21	59
			Valine,leucine and isoleucine
116	1	AO090023000127		dihydroxy-acid dehydratase	up	6.19483	61.8964	6.55	65.8806	15	7	0.17	74
128	1	AO090701000557		ketol-acid reductoisomerase	up	5.66685	29.7943	8.77	44.5088	7	5	5.02	60
129	1	AO090701000557		ketol-acid reductoisomerase	0.289643	6.47743	26.4762	8.77	44.5088	14	9	0.3	126
105	1	AO090005001122		3-isopropylmalate dehydrogenase	up	5.69623	33.6673	5.29	38.7551	27	8	0.28	71
			Threonine and methionine
126	1	AO090003000721		homoserine dehydrogenase	up	5.3627	43.798	8.45	42.5894	19	13	0.53	195
127	1	AO090003000721		homoserine dehydrogenase	2.74528	5.56762	43.8051	8.45	42.5894	29	12	0.49	147
	2	AO090023000923		Glutamate/Leucine/Phenylalanine/Valine dehydrogenase, putative; K00262 glutamate dehydrogenase (NAD				5.68	49.531	29	7	0.19	58
426	1	AO090038000417		S-adenosylhomocysteine hydrolase	up	5.51739	29.2098	5.8	49.5272	21	7	0.16	72
	2	AO090120000493		triosephosphate isomerase				5.46	27.5114	21	5	0.25	55
			Methionine and cysteine
115	1	AO090102000630		homocysteine synthase CysD	2.25381	6.56664	40.8143	5.97	47.0779	21	8	0.31	93
	2	AO090023000837		cobalamin-independent methionine synthase MetH/D				6.5	87.3547	21	9	0.2	88
137	1	AO090023000205		ATP citrate lyase subunit	up	6.2257	57.6083	5.94	52.8226	29	10	0.26	99
	2	AO090023000837		cobalamin-independent methionine synthase MetH/D				6.5	87.3547	29	10	0.17	81
484	1	AO090001000037		predicted protein	3.52615	6.34074	39.2775	6.13	34.4094	29	8	0.38	90
	2	AO090023000837		cobalamin-independent methionine synthase MetH/D				6.5	87.3547	29	10	0.15	66
135	1	AO090023000837		methionine synthase II (cobalamin-independent)	up	6.33957	34.1852	6.5	87.3547	15	9	0.18	104
136	1	AO090023000837		methionine synthase II (cobalamin-independent)	up	6.19955	37.6973	6.5	87.3547	12	7	0.14	81
138	1	AO090023000837		methionine synthase II (cobalamin-independent)	up	6.57291	29.0192	6.5	87.3547	17	10	0.21	114
139	1	AO090023000837		methionine synthase II (cobalamin-independent)	up	6.42067	32.2261	6.5	87.3547	29	12	0.21	114
	2	AO090038000357		S-adenosylmethionine synthetase				5.58	42.6269	29	6	0.18	57
140	1	AO090023000837		methionine synthase II (cobalamin-independent)	up	6.81414	63.7708	6.5	87.3547	25	15	0.29	165
141	1	AO090023000837		methionine synthase II (cobalamin-independent)	up	6.72799	69.7258	6.5	87.3547	30	21	0.37	253
142	1	AO090023000837		methionine synthase II (cobalamin-independent)	up	6.82978	81.3858	6.5	87.3547	28	23	0.42	298
143	1	AO090023000837		methionine synthase II (cobalamin-independent)	3.92213	6.56487	45.4142	6.5	87.3547	15	10	0.19	123
144	1	AO090023000837		methionine synthase II (cobalamin-independent)	4.3564	6.59391	68.4133	6.5	87.3547	50	33	0.43	337
145	1	AO090023000837		methionine synthase II (cobalamin-independent)	4.65998	6.63588	69.8864	6.5	87.3547	25	18	0.34	219
146	1	AO090023000837		methionine synthase II (cobalamin-independent)	2.51082	6.53755	67.1752	6.5	87.3547	43	29	0.4	305
147	1	AO090023000837		methionine synthase II (cobalamin-independent)	2.12798	5.77662	25.7063	6.5	87.3547	32	12	0.16	89
148	1	AO090023000837		methionine synthase II (cobalamin-independent)	0.426919	6.37094	20.3736	6.5	87.3547	19	8	0.1	55
149	1	AO090023000837		methionine synthase II (cobalamin-independent)	0.113964	6.87136	71.9293	6.5	87.3547	22	16	0.29	194
			Glutamate
118	1	AO090023000923		glutamate/leucine/phenylalanine/valine dehydrogenases	up	5.72303	44.3749	5.68	49.531	25	14	0.42	166
	2	AO090023000205		ATP citrate lyase subunit (Acl), putatibe				5.94	52.8226	25	7	0.2	67
119	1	AO090023000923		glutamate/leucine/phenylalanine/valine dehydrogenases	3.18474	5.91296	54.3038	5.68	49.531	26	14	0.43	162
120	1	AO090023000923		glutamate/leucine/phenylalanine/valine dehydrogenases	2.72911	6.54319	52.8912	5.68	49.531	41	15	0.38	137
	2	AO090023000837		cobalamin-independent methionine synthase MetH/D				6.5	87.3547	41	14	0.27	114
121	1	AO090023000923		glutamate/leucine/phenylalanine/valine dehydrogenases	down	4.7334	27.5462	5.68	49.531	19	10	0.32	117
122	1	AO090023000923		glutamate/leucine/phenylalanine/valine dehydrogenases	0.389526	5.67139	31.9145	5.68	49.531	18	11	0.33	121
117	1	AO090001000717		glutamate/leucine/phenylalanine/valine dehydrogenases	up	5.79026	43.7173	6.07	120.755	33	17	0.18	136
			Histidine
114	1	AO090005000135		ATP phosphoribosyltransferase	2.7295	5.1447	34.784	5.04	32.9424	25	6	0.3	64
			Arginine
112	1	AO090023000395		argininosuccinate synthase	up	5.41296	52.0183	5.42	47.2307	30	11	0.29	113
	2	AO090103000007		Hsp70 chaperone (HscA), putative				5.29	67.1676	30	10	0.22	88
113	1	AO090023000395		argininosuccinate synthase	1.81308	5.41959	52.9457	5.42	47.2307	19	10	0.28	124
111	1	AO090020000418		argininosuccinate lyase	0.282409	5.98379	57.2513	5.77	52.1007	28	21	0.56	281
			Serine
164	1	AO090009000711		D-3-phosphoglycerate dehydrogenase, D-isomer-specific 2-hydroxy acid dehydrogenase superfamily	up	5.19622	26.7262	5.09	35.0883	11	5	0.26	70
165	1	AO090009000711		D-3-phosphoglycerate dehydrogenase, D-isomer-specific 2-hydroxy acid dehydrogenase superfamily	down	5.15146	27.949	5.09	35.0883	35	7	0.31	66
			Lysine
131	1	AO090003000729		lysine-ketoglutarate reductase/saccharopine dehydrogenase	up	5.21414	32.3272	5.57	41.5475	28	11	0.28	109
132	1	AO090003001086		lysine-ketoglutarate reductase/saccharopine dehydrogenase	0.423403	5.96129	56.3134	5.57	49.7204	21	9	0.2	95
*	White columns indicate that the up-regulated spots in A. oryzae 100-8
	Gray columns indicate that the down-regulated spots in A. oryzae 100-8
	Up indicates the spots only expressed in A. oryzae 100-8
	Down indicates the spots only expressed in A. oryzae 3.042
1)	Average ratios of A. oryzae 100-8 and 3.042 from statistical analysis of 2-DE gels
2)	MS Data from MALDI-TOF/TOF

## Sheet: Table S3
Table S3. Corresponding enzymes (coding genes) of biochemical reactions potentially catalyzing these reactions.
Reactions and CDSs depicted in Figure 2 are indicated.
Reaction number in Figure 2	Reaction identifier defined as in KEGG	Coded equation as in KEGG. C##### is identifier for compound	Definition of the reaction	EC number	Reversibility(1:irreversible, 0: reversible)	CDS in A. oryzae
1	R00355	C00049 + C00026 <=> C00036 + C00025	L-Aspartate + 2-Oxoglutarate <=> Oxaloacetate + L-Glutamate	2.6.1.1	0	AO090011000679, AO090003001171, AO090120000135	AO1008_05657, AO1008_11609
2	R00248	C00025 + C00006 + C00001 <=> C00026 + C00014 + C00005 + C00080	L-Glutamate + NADP+ + H2O <=> 2-Oxoglutarate + NH3 + NADPH + H+	1.4.1.4	0	AO090023000923	AO1008_09334
3	R00670	C00077 <=> C00134 + C00011	L-Ornithine <=> Putrescine + CO2	4.1.1.17	0	AO090023000771	AO1008_09191
4	R00253	C00002 + C00025 + C00014 <=> C00008 + C00009 + C00064	ATP + L-Glutamate + NH3 <=> ADP + Orthophosphate + L-Glutamine	6.3.1.2	1	AO090011000308, AO090009000558	AO1008_11218
5	R00261	C00025 <=> C00334 + C00011	L-Glutamate <=> 4-Aminobutanoate + CO2	4.1.1.15	1	AO090003000666, AO090103000342, AO090005000539	AO1008_05313
6	R01648	C00334 -> C00232	4-Aminobutanoate + 2-Oxoglutarate <=> Succinate semialdehyde + L-Glutamate	2.6.1.19	0	AO090701000206	AO1008_07339
	R10178	C00334 -> C00232	4-Aminobutanoate + Pyruvate <=> Succinate semialdehyde + L-Alanine	2.6.1.19	0	AO090701000206	AO1008_07339
7	R00259	C00024 + C00025 <=> C00010 + C00624	Acetyl-CoA + L-Glutamate <=> CoA + N-Acetyl-L-glutamate	2.3.1.1	1	AO090701000729, AO090026000498	AO1008_10228, AO1008_06002
8	R02283	C00437 + C00026 <=> C01250 + C00025	N-Acetylornithine + 2-Oxoglutarate <=> N-Acetyl-L-glutamate 5-semialdehyde + L-Glutamate	2.6.1.11	1	AO090026000394	AO1008_06084
9	R02282	C00437 + C00025 <=> C00077 + C00624	N-Acetylornithine + L-Glutamate <=> L-Ornithine + N-Acetyl-L-glutamate	2.3.1.35	0	AO090701000729	AO1008_10228
10	R01398	C00169 + C00077 <=> C00009 + C00327	Carbamoyl phosphate + L-Ornithine <=> Orthophosphate + L-Citrulline	2.1.3.3	1	AO090023000856	AO1008_09272
11	R00256	C00064 + C00001 <=> C00025 + C00014	L-Glutamine + H2O <=> L-Glutamate + NH3	6.3.5.5	1	AO090011000630, AO090701000214, AO090023000483	AO1008_07332
12	R00734	C00082 + C00026 <=> C01179 + C00025	L-Tyrosine + 2-Oxoglutarate <=> 3-(4-Hydroxyphenyl)pyruvate + L-Glutamate	2.6.1.1	0	AO090011000679, AO090003001171, AO090120000135	AO1008_05657, AO1008_11609
13	R02521	C01179 + C00007 <=> C00544 + C00011	3-(4-Hydroxyphenyl)pyruvate + Oxygen <=> Homogentisate + CO2	1.13.11.27	1	AO090003000208, AO090038000266, AO090103000429	AO1008_04402
14	R02519	C00544 + C00007 <=> C01036	Homogentisate + Oxygen <=> 4-Maleylacetoacetate	1.13.11.5	1	AO090012000156, AO090003000210	AO1008_04404
15	R01364	C00164 + C00122 <=> C01061 + C00001	Acetoacetate + Fumarate <=> 4-Fumarylacetoacetate + H2O	3.7.1.2	1	AO090003000211	AO1008_04405
16	R02382	C00483 + C00001 + C00007 <=> C03765 + C00014 + C00027	Tyramine + H2O + Oxygen <=> 4-Hydroxyphenylacetaldehyde + NH3 + Hydrogen peroxide	1.4.3.21	1	AO090138000079, AO090005000103, AO090011000229, AO090701000307, AO090003000356, AO090103000401, AO090701000490	AO1008_09501, AO1008_04660, AO1008_04534
17	R04300	C03758 + C00001 + C00007 <=> C04043 + C00014 + C00027	Dopamine + H2O + Oxygen <=> 3,4-Dihydroxyphenylacetaldehyde + NH3 + Hydrogen peroxide	1.4.3.21	1	AO090138000079, AO090005000103, AO090011000229, AO090701000307, AO090003000356, AO090103000401, AO090701000490	AO1008_09501, AO1008_04660, AO1008_04534
18	R04880	C05576 + C00003 <=> C05577 + C00004 + C00080	3,4-Dihydroxyphenylethyleneglycol + NAD+ <=> 3,4-Dihydroxymandelaldehyde + NADH + H+	1.1.1.1	0	AO090009000634, AO090010000616, AO090038000108, AO090701000373	AO1008_03689, AO1008_09989
19	R02291	C00441 + C00009 + C00006 <=> C03082 + C00005 + C00080	L-Aspartate 4-semialdehyde + Orthophosphate + NADP+ <=> 4-Phospho-L-aspartate + NADPH + H+	1.2.1.11	1	AO090020000314	AO1008_11523
20	R00996	C00188 <=> C00109 + C00014	L-Threonine <=> 2-Oxobutanoate + NH3	4.3.1.19	1	AO090023000756	AO1008_09177
21	R00751	C00188 <=> C00037 + C00084	L-Threonine <=> Glycine + Acetaldehyde	4.1.2.5	0	AO090012000408, AO090005000497	AO1008_02381, AO1008_02685
22	R06171	C05519 <=> C00037 + C00084	L-Allothreonine <=> Glycine + Acetaldehyde	4.1.2.5	0	AO090012000408, AO090005000497	AO1008_02381, AO1008_02685
23	R00897	C00979 + C00283 <=> C00097 + C00033	O-Acetyl-L-serine + Hydrogen sulfide <=> L-Cysteine + Acetate	2.5.1.74	1	AO090005000626, AO090102000276	AO1008_04992
24	R00897	C00979 + C00283 <=> C00097 + C00033	O-Acetyl-L-serine + Hydrogen sulfide <=> L-Cysteine + Acetate	2.5.1.74	1	AO090005000626, AO090102000276	AO1008_04992
25	R01289	C00065 + C00155 <=> C00542 + C00001	L-Serine + L-Homocysteine <=> Cystathionine + H2O	4.2.1.22	1	AO090011000931	AO1008_09043
26	R00220	C00065 <=> C00022 + C00014	L-Serine <=> Pyruvate + NH3	4.3.1.19	0	AO090023000756	AO1008_09177
27	R00891	C00065 + C00283 <=> C00097 + C00001	L-Serine + Hydrogen sulfide <=> L-Cysteine + H2O	4.2.1.22	1	AO090011000931	AO1008_09043
28	R01290	C00065 + C00155 <=> C02291 + C00001	L-Serine + L-Homocysteine <=> L-Cystathionine + H2O	4.2.1.22	1	AO090011000931	AO1008_09043
29	R00678	C00078 + C00007 <=> C02700	L-Tryptophan + Oxygen <=> L-Formylkynurenine	1.13.11.52	1	AO090020000618, AO090003001248, AO090038000578	AO1008_08815
30	R03936	C02700 + C00001 <=> C05653 + C00041	L-Formylkynurenine + H2O <=> Formylanthranilate + L-Alanine	3.7.1.3	1	AO090011000602, AO090003001247	AO1008_04147
31	R00715	C00449 + C00003 + C00001 <=> C00047 + C00026 + C00004 + C00080	N6-(L-1,3-Dicarboxypropyl)-L-lysine + NAD+ + H2O <=> L-Lysine + 2-Oxoglutarate + NADH + H+	1.5.1.7	1	AO090003000729	AO1008_06789
32	R00355	C00049 + C00026 <=> C00036 + C00025	L-Aspartate + 2-Oxoglutarate <=> Oxaloacetate + L-Glutamate	2.6.1.1	0	AO090011000679, AO090003001171, AO090120000135	AO1008_05657, AO1008_11609
33	R01372	C00166 + C00007 <=> C05852 + C00011	Phenylpyruvate + Oxygen <=> 2-Hydroxyphenylacetate + CO2	1.13.11.27	1	AO090003000208, AO090038000266, AO090103000429	AO1008_04402
34	R02613	C05332 + C00007 + C00001 <=> C00601 + C00014 + C00027	Phenethylamine + Oxygen + H2O <=> Phenylacetaldehyde + NH3 + Hydrogen peroxide	1.4.3.21	0	AO090138000079, AO090005000103, AO090011000229, AO090701000307, AO090003000356, AO090103000401, AO090701000490	AO1008_09501, AO1008_04660, AO1008_04534
35	R02199	C00123 + C00026 <=> C00233 + C00025	L-Leucine + 2-Oxoglutarate <=> 4-Methyl-2-oxopentanoate + L-Glutamate	2.6.1.42	1	AO090011000598, AO090005000936, AO090023000977	AO1008_05374
36	R01090	C00407 + C00026 <=> C00671 + C00025	L-Isoleucine + 2-Oxoglutarate <=> (S)-3-Methyl-2-oxopentanoic acid + L-Glutamate	2.6.1.42	1	AO090011000598, AO090005000936, AO090023000977	AO1008_05374
37	R01214	C00183 + C00026 <=> C00141 + C00025	L-Valine + 2-Oxoglutarate <=> 3-Methyl-2-oxobutanoic acid + L-Glutamate	2.6.1.42	1	AO090011000598, AO090005000936, AO090023000977	AO1008_05374
38	R07603	C00671 + C00068 <=> C15978 + C00011	(S)-3-Methyl-2-oxopentanoic acid + Thiamin diphosphate <=> 2-Methyl-1-hydroxybutyl-ThPP + CO2+ CO2	1.2.4.4	1	AO090023000349, AO090001000555	AO1008_07795
39	R07601	C00233 + C00068 <=> C15974 + C00011	4-Methyl-2-oxopentanoate + Thiamin diphosphate <=> 3-Methyl-1-hydroxybutyl-ThPP + CO2	1.2.4.4	1	AO090023000349, AO090001000555	AO1008_07795
40	R07599	C00141 + C00068 <=> C15976 + C00011	3-Methyl-2-oxobutanoic acid + Thiamin diphosphate <=> 2-Methyl-1-hydroxypropyl-ThPP + CO2	1.2.4.4	1	AO090023000349, AO090001000555	AO1008_07795
41	R04225	C00671 + C15972 <=> C15979 + C00011	(S)-3-Methyl-2-oxopentanoic acid + Enzyme N6-(lipoyl)lysine <=> [Dihydrolipoyllysine-residue (2-methylpropanoyl)transferase] S-(2-methylbutanoyl)dihydrolipoyllysine + CO2	1.2.4.4	1	AO090023000349, AO090001000555	AO1008_07795
42	R01702	C00233 + C15972 <=> C15975 + C00011	4-Methyl-2-oxopentanoate + Enzyme N6-(lipoyl)lysine <=> [Dihydrolipoyllysine-residue (2-methylpropanoyl)transferase] S-(3-methylbutanoyl)dihydrolipoyllysine + CO2	1.2.4.4	1	AO090023000349, AO090001000555	AO1008_07795
43	R01701	C00141 + C15972 <=> C15977 + C00011	3-Methyl-2-oxobutanoic acid + Enzyme N6-(lipoyl)lysine <=> [Dihydrolipoyllysine-residue (2-methylpropanoyl)transferase] S-(2-methylpropanoyl)dihydrolipoyllysine + CO2	1.2.4.4	1	AO090023000349, AO090001000555	AO1008_07795
44	R02662	C00630 + C15973 <=> C00010 + C15977	2-Methylpropanoyl-CoA + Enzyme N6-(dihydrolipoyl)lysine <=> CoA + [Dihydrolipoyllysine-residue (2-methylpropanoyl)transferase] S-(2-methylpropanoyl)dihydrolipoyllysine	2.3.1.168	1	AO090003001008	AO1008_05517
45	R04096	C02939 + C04253 <=> C03069 + C04570	3-Methylbutanoyl-CoA + Electron-transferring flavoprotein <=> 3-Methylcrotonyl-CoA + Reduced electron-transferring flavoprotein	1.3.8.4	1	AO090020000493	AO1008_00532
46	R04138	C00002 + C03069 + C00288 <=> C00008 + C00009 + C03231	ATP + 3-Methylcrotonyl-CoA + HCO3- <=> ADP + Orthophosphate + 3-Methylglutaconyl-CoA	6.4.1.4	1	AO090020000492, AO090020000495	AO1008_00531, AO1008_00534
47	R01360	C00356 <=> C00024 + C00164	(S)-3-Hydroxy-3-methylglutaryl-CoA <=> Acetyl-CoA + Acetoacetate (S)-3-Hydroxy-3-methylglutaryl-CoA <=> Acetyl-CoA + Acetoacetate	4.1.3.4	1	AO090026000392, AO090038000541	AO1008_06086
48	R04188	C03284 + C00026 <=> C06002 + C00025	L-3-Amino-isobutanoate + 2-Oxoglutarate <=> (S)-Methylmalonate semialdehyde + L-Glutamate	2.6.1.22	0	AO090701000206	AO1008_07339
